# Supplementary material
Source: PubMed Central journal article supplement (PMC4006951)
Supplement: NIHMS572543-supplement-suppl_material.pdf [file NIHMS572543-supplement-suppl_material.pdf]

## SUPPLEMENTAL MATERIAL

### SUPPLEMENTAL METHODS

#### Clinic-based derivation cohorts

All samples were from individuals of self-reported European ancestry. Patients were classified into etiologic subtypes according to the Trial of Org 10172 in Acute Stroke Treatment (TOAST)<sup>1</sup>. This classification includes six categories: (1) large-artery occlusive disease (large vessel disease, LAS), (2) cardioembolism (cardiogenic stroke, CES), (3) small vessel disease (lacunar stroke, SVS), (4) other determined etiology, (5) etiology unknown despite diagnostic efforts, or (6) more than one etiology. Individuals with other determined etiology were excluded prior to genotyping.

Details of individual WTCCC2 populations can be found in.<sup>2</sup> In brief, the four discovery case cohorts and matching control cohorts were as follows:

**WTCCC2-UK** (2374 cases in total, mean age 72.2± 12.5 years, 1104 females)

(a) St George's Stroke Study, London, UK: St George's Ischemic stroke patients of European descent attending a cerebrovascular service were recruited 1995-2008. All cases were phenotyped by one experienced stroke neurologist with review of original imaging.

(b) Oxford Vascular Study, UK: Patients of European descent with acute ischemic stroke or TIA with evidence of infarction on brain imaging were recruited during 2002-2008 as part of a population-based study of all TIA and stroke in about 91,000 people in Oxfordshire, UK. All cases were phenotyped by one experienced stroke neurologist with review of original imaging.

(c) Edinburgh Stroke Study, Scotland, UK: Between 2002 and 2005 consecutive, consenting patients with stroke who were admitted to or seen as outpatients at the Western General Hospital, Edinburgh were prospectively recruited. Cases in this study were those of European descent with a clinically evident stroke, demonstrated by brain imaging (CT or MRI) to be ischemic (ie, primary hemorrhage excluded). An experienced stroke physician assessed each patient as soon as possible after the stroke, prospectively recording demographic and clinical details, including vascular risk factors and results of brain imaging and other investigations.

**WTCCC2-Munich sample** (1174 cases, mean age 66.7 ± 12.9 years, 448 female)

Munich, Germany: 1,174 white European patients were recruited consecutively from a single dedicated Stroke Unit (Klinikum der Universität München, Ludwig-Maximilians-University, Munich) from 2002-2008.

#### **Discovery cohort controls**

The control data set for the UK discovery samples was previously described<sup>2</sup> totaling 5,667 samples (2,742 females) from the 1958 Birth Cohort (58C) and the National Blood service (NBS). The control data set for the German cases was taken from the MONICA/KORA Augsburg Study of independent population based controls from the same region of Germany (840 samples, 404 females). No phenotypic data was available for the controls, in line with WTCCC1 and the other disease group analyses in WTCCC2. Only gender was inferable from provided genotype information, and age was inferred from the 58C as this was a birth year based study.

#### **DNA preparation and genotyping**

Genomic DNA for all Discovery cases was shipped to the Sanger Institute, Cambridge. Where there was sufficient DNA, quality was validated using the Sequenom iPLEX assay designed to genotype four gender SNPs and 26 SNPs present on the Illumina Beadchips. DNA concentrations were quantified using a PicoGreen assay (Invitrogen) and an aliquot assayed by agarose gel electrophoresis. A DNA sample was considered to pass quality control if the DNA concentration was greater than or equal to 50 ng/l, the DNA was not degraded, the gender assignment from the iPLEX assay matched that provided in the patient data manifest and genotypes were obtained for at least two thirds of the SNPs on the iPLEX.

Genotyping of the samples was carried out at the WTSI on the Illumina BeadArray platform. Cases were genotyped on the Illumina Human660-Quad array and the controls were genotyped on the Illumina 1.2M-Duo array. Normalised probe intensities were exported using the BeadStudio program and genotypes called separately in the 58C, NBS and PD datasets using the native GENCALL algorithm<sup>3</sup>. British controls were genotyped using the Illumina Human1.2M-Duo. German controls were genotyped on the Illumina Human 550k platform. Quality control procedures in the WTCCC2 excluded SNPs not genotyped on all case and control collections and SNPs with Fisher information measure <0.98, genotype call rate <0.95, MAF <0.01 or Hardy-Weinberg P-value <1E-20 in either the case or control collections. Samples were also removed if they exhibited discrepancies between inferred and recorded gender or cryptic relatedness with other WTCCC2 samples (pairwise identity-by-descent >0.05). In total, 108 samples were removed due to poor quality.

## Quality Control

Genotype data quality control was via the protocol that was established for the WTCCC2 studies. A few refinements to the conventional fixed-threshold based quality control have been made to obtain the more powerful sets of samples and SNPs for subsequent analysis. For the purposes of quality control SNPs were excluded from analysis if, in any of the data sets (58C, stroke, NBS or KORA), they had a minor allele frequency (MAF) less than 1%, a significant departure from Hardy Weinberg Equilibrium ( $P < 10^{-5}$ ) or a significant association with the plate on which the samples were assayed ( $P < 10^{-6}$ ). We also excluded SNPs for which the observed statistical (Fisher) information about the allele frequency was less than 98% of the information contained in a hypothetical sample of the same size and expected MAF but with no missing data. In total after QC 561,991 SNPs were available common to all chips used for genotyping. More information about quality control can be seen in <sup>2</sup>.

## Imputation

Autosomal genotype imputation was performed using MACH based on HapMap Phase 2 European (CEU) reference data. Overall imputation quality was very good, with an average info score of 0.93. Only variants with an info score  $> 0.3$  were used in subsequent analyses. Standard QC, as illustrated in the Methods section, was used in each imputed cohort separately and in the merged cohorts. Before QC, the SNP set consisted of 2,543,909 SNPs, after QC, the final set included 2,419,891 SNPs. All SNPs not present in the imputation panel were removed from analysis. All individuals included in the analysis had information available on all SNPs used.

## Clinic-based replication cohorts

**MGH-GASROS (Massachusetts General Hospital- Genes Associated with Stroke Risk and Outcomes Study, 767 cases, mean age 66.6+-14.5, 329 female):** We analyzed phenotype and genotype data for ischemic stroke cases and controls enrolled in the Genes Affecting Stroke Risk and Outcome Study (GASROS)<sup>4</sup> at Massachusetts General Hospital (MGH) and additional stroke free controls from the Genetics of Cerebral Hemorrhage on Anticoagulation (GOCHA) study<sup>5</sup> in the USA (participating sites included Massachusetts General Hospital, Beth Israel Deaconess Medical Center, Mayo Clinic Jacksonville, and the universities of Michigan, Virginia, Florida at Jacksonville, Washington and Utah).

All included cases were  $\geq 18$  years presenting with ischemic stroke and admitted to the MGH Stroke Unit through the Emergency Department, or evaluated in the MGH Neurology outpatient clinics, as well as on the inpatient Medical and Vascular Surgical services from January 2003 to July 2008. Ischemic stroke was defined as either (1) a radiographically proven (head CT or MRI) infarct associated with the appropriate clinical stroke syndrome, or (2) a fixed neurological deficit persisting more than 24 hours, consistent with a vascular pattern of involvement and without radiographic evidence of demyelinating disease, or other non-vascular structural disease. All subjects were evaluated by a neurologist upon presentation and clinical and laboratory data were collected during the admission for qualifying ischemic stroke event. All patients had brain imaging (CT and/or MRI) as well as ancillary diagnostic investigations where clinically relevant.

Controls were enrolled from the population that gave rise to the cases at MGH and participating institutions. Controls were confirmed to have no medical history of acute ischemic stroke (AIS) or intracerebral hemorrhage (ICH) by means of interview and review of medical records.

Peripheral whole blood was collected from cases and controls at each participating institution at the time of consent. Blood samples were subsequently shipped to the Massachusetts General Hospital, the coordinating center, and genotyping was carried out at the Broad Institute. DNA was isolated from fresh or frozen blood, quantified with a quantification kit (Qiagen, Valencia, CA, USA) and normalized to a concentration of 30 ng/ $\mu$ L. Genotyping was performed using Illumina (San Diego, CA, USA) HumanHap 610 Quad (GASROS cases and GOCHA controls) or Affymetrix 6.0 Beadchip arrays (portion of GASROS cases).

GW data went through a series of quality control metrics aimed at identifying individual subjects with poor quality genotyping, as well as SNPs with evidence of inadequate / incomplete capture. QC procedures excluded SNPs missing in  $> 5\%$  of samples, with a MAF  $< 1\%$ , or with an excessive deviation from HWE  $p < 1E-06$ .

Individuals were removed if their inferred genotype gender was discordant with the recorded gender, or they had more than 5% missing genotype data. Individuals were also excluded if they were found to have familial relatedness - first cousin relationship or closer (one of each pair demonstrating identity-by-descent  $\text{pi-hat} > 0.15$

was removed) - as their inclusion might unduly influence our findings. Additionally, Principal Component Analysis (PCA) was performed on GW data using HapMap Phase 3 populations to identify subjects of non-European descent. These subjects were therefore removed from all further analysis. QC and PCA were performed using PLINK v1.6 using previously validated protocols<sup>6</sup>.

IMPUTE2 software was utilized to impute unobserved SNPs based on reference panels from the HapMap3 and 1000 Genomes Project Phase pilot (June 2010).

**ASGC (Australian Stroke Genetics Collaborative, 1177 cases, mean age 72.9+-13.2, 535 female)** : ASGC stroke cases comprised European-ancestry stroke patients admitted to four clinical centres across Australia (The Neurosciences Department at Gosford Hospital, Gosford, New South Wales (NSW); the Neurology Department at John Hunter Hospital, Newcastle, NSW; The Queen Elizabeth Hospital, Adelaide; and the Royal Perth Hospital, Perth) between 2003 and 2008. Stroke was defined by WHO criteria as a sudden focal neurologic deficit of vascular origin, lasting more than 24 hours and confirmed by imaging such as computerized tomography (CT) and/or magnetic resonance imaging (MRI) brain scan. Other investigative tests such as electrocardiogram, carotid doppler and transoesophageal echocardiogram were conducted to define IS mechanism as clinically appropriate. Cases were excluded from participation if aged <18 years, diagnosed with hemorrhagic stroke or transient ischemic attack rather than IS, or were unable to undergo baseline brain imaging. Based on these criteria, a total of 1230 IS cases were included in the current study. IS subtypes were assigned using TOAST criteria, based on clinical, imaging and risk factor data.<sup>1</sup>

ASGC controls were participants in the Hunter Community Study (HCS), a population-based cohort of individuals aged 55-85 years, predominantly of European Caucasian ancestry and residing in the Hunter Region, NSW, Australia. Detailed recruitment methods for the HCS have been previously described<sup>7</sup>. Briefly, participants were randomly selected from the NSW State electoral roll and contacted by mail between 2004 and 2007. Consenting participants completed five detailed self-report questionnaires and attended the HCS data collection centre, at which time a series of clinical measures were obtained. A total of 1280 HCS participants were genotyped for the current study.

All study participants gave informed consent for participation in genetic studies. Approval for the individual studies was obtained from relevant institutional ethics committees.

**GEOS (Genetics of Early-Onset Stroke, 448 cases, 41.0+-6.9, 184 female)**: GEOS is a population-based case-control study designed to identify genes associated with early-onset stroke in patients with first-ever ischemic stroke aged 15-49 years from the greater Baltimore- Washington area between 1992 and 2008. Only patients of European descent are included in this analysis.

Cases were identified through discharge surveillance from 59 participating hospitals and direct physician referral from a defined geographic region. Abstracted medical records were reviewed and adjudicated for ischemic stroke subtype by two neurologists, with discrepancies resolved by a third neurologist. Controls with no history of ischemic stroke were identified through random digit dialing and were frequency-matched to cases based on sex, age, geographic location and, during the later study periods, ethnicity.

**ISGS/SWISS (Ischemic Stroke Genetics Study/ Siblings with Ischemic Stroke Study, total 1,070 cases, mean age 66.5+-13.6, 528 female)**: The Siblings with Ischemic Stroke Study (SWISS) is a multicenter affected sibling pair study enrolling probands with ischemic stroke at 66 US medical centers and 4 Canadian medical centers.<sup>8</sup> All probands are adult men and women over the age of 18 years diagnosed with ischemic stroke confirmed by a study neurologist on the basis of history, physical examination and CT or MR imaging of the brain. Additionally all probands were required to have at least one living sibling with a history of stroke. Siblings were enrolled using proband-initiated contact or direct contact when permitted by Institutional Review Boards<sup>9</sup>. Clinical exclusion criteria mirrored that in ISGS. Concordant siblings had their diagnosis of ischemic stroke confirmed by review of medical records by a central vascular neurology committee. Subtype diagnoses were assigned to the index strokes of probands and concordant siblings according to TOAST criteria<sup>10</sup>. Readily available US controls were utilized, including stroke-free participants from the Baltimore Longitudinal Study of Aging and the National Institute of Neurological Diseases and Stroke neurologically normal control series taken from the Coriell Cell Repositories. All controls had been previously genotyped and described in detail elsewhere. The Ischemic Stroke Genetic Study (ISGS) is a multicenter study where inpatient cases were recruited from five United States academic medical centers<sup>11</sup>. Cases are adult men and women over the age of 18 years diagnosed with first-ever ischemic stroke confirmed by a study neurologist on the basis of history, physical examination and CT or MR imaging of the brain who were enrolled within 30 days of onset of stroke symptoms. Cases exclusion criteria include: a mechanical aortic or mitral valve at the time of the index ischemic stroke, central nervous system vasculitis, bacterial endocarditis, cerebral autosomal dominant arteriopathy with subcortical

infarcts and leukoencephalopathy (CADASIL), Fabry disease, homocystinuria, mitochondrial encephalopathy with lactic acidosis and stroke-like episodes (MELAS), or sickle cell anemia. Stroke severity at enrollment was assessed using the NIH Stroke Scale with the diagnostic evaluation including head CT (95%) or MRI (83%), electrocardiography (92%), cervical arterial imaging (86%), and echocardiography (74%). Medical records from all cases were centrally reviewed by a vascular neurology committee and assigned ischemic stroke subtype diagnoses according to criteria from the Trial of ORG10172 (TOAST), the Oxfordshire Community Stroke Project, and the Baltimore-Washington Young Stroke Study.

**BRAINS (Bio-Repository of DNA in Stroke, 394 cases, mean age 74.4+-7.2, 184 female):** The Bio-Repository of DNA in Stroke (BRAINS) is an international study recruiting highly phenotyped patients with stroke. For the purposes of the current work all patients were Caucasians.

Diagnosis of stroke was confirmed using positive imaging (MRI or CT) and ischemic stroke subtypes were assigned using TOAST criteria <sup>1</sup>, based on clinical, imaging and risk factor data. Controls were European-Ancestry, stroke-free participants from the shared WTCCC controls, a prospectively collected cohort of individuals born in 1958 (1958 Birth Cohort). The cohort has been described in detail elsewhere <sup>12</sup>.

### **Population based replication cohorts**

#### **ARIC (Atherosclerosis Risk in Communities Study):**

The ARIC study is a prospective population-based study of atherosclerosis and clinical atherosclerotic diseases in 15,792 men and women, including 11,478 non-Hispanic white participants, drawn from 4 U.S. communities (Suburban Minneapolis, Minnesota; Washington County, Maryland; Forsyth County, North Carolina, and Jackson, Mississippi). In the first three communities, the sample reflects the demographic composition of the community. In Jackson, only black residents were enrolled. Ancestry was self-reported during an interview. Over 99% self-identified as either white or black. Only self-identified whites were included in the analyses.<sup>13</sup>

Hospitalized strokes that occurred by December 31, 2008 (median follow-up, 19.9 years) were included in the analyses. During annual telephone contacts, trained interviewers asked each ARIC participant to list all hospitalizations during the past year. Hospital records for any hospitalizations identified were then obtained. Moreover, all local hospitals annually provided lists of stroke discharges (International Classification of Diseases, Ninth Revision, Clinical Modification codes 430 to 438), which were surveyed for ARIC participant discharges. Details on quality assurance for ascertainment and classification of stroke are described elsewhere.<sup>14</sup> Briefly, the stroke diagnosis was assigned according to criteria adapted from the National Survey of Stroke.<sup>15</sup> Strokes secondary to trauma, neoplasm, hematologic abnormality, infection, or vasculitis were excluded, and a focal deficit lasting <24 hours was not considered to be a stroke. Out-of-hospital stroke was not ascertained and validated; thus, these potential stroke events are not included. Strokes were classified into hemorrhagic stroke (subarachnoid and intracerebral hemorrhage) and ischemic stroke (thrombotic and embolic brain infarction). A stroke was classified as ischemic when a brain CT or MRI revealed acute infarction and showed no evidence of hemorrhage. All definite ischemic strokes were further classified as lacunar, nonlacunar thrombotic, or cardioembolic on the basis of the recorded neuroimaging results. A stroke was classified as “lacunar” when 2 criteria were met: (1) typical location of the infarct (basal ganglia, brain stem, thalamus, internal capsule, or cerebral white matter); and (2) infarct size of  $\leq 2$  cm or unstated size.<sup>16</sup> Definite or probable “cardioembolic” stroke required either (1) autopsy evidence of an infarcted area in the brain and a source of possible cerebral emboli in a vessel or the presence of an embolus in the brain or (2) medical record evidence of a possible noncarotid source of embolus such as moderate or greater valvular heart disease, atrial fibrillation, cardiac or arterial procedure (eg, cardiac catheterization, open heart surgery, cerebral angiography, and carotid endarterectomy), or intracardiac thrombus. Definite or probable ischemic strokes that were not classified as lacunar or cardioembolic, including atherothrombotic and unclassified thrombotic strokes, were labeled “nonlacunar.” Hemorrhagic strokes identified by ARIC were censored at the time of their occurrence.

#### **CHS (Cardiovascular Health Study):**

The CHS is a population-based cohort study of risk factors for CHD and stroke in adults  $\geq 65$  years conducted across four field centers.<sup>17</sup> The original predominantly Caucasian cohort of 5,201 persons was recruited in 1989-1990 from random samples of the Medicare eligibility lists; subsequently, an additional predominantly African-American cohort of 687 persons were enrolled for a total sample of 5,888. DNA was extracted from blood samples drawn on all participants at their baseline examination in 1989-90. In 2007-2008, genotyping was performed at the General Clinical Research Center's Phenotyping/Genotyping Laboratory at Cedars-Sinai using the Illumina 370CNV BeadChip system on 3980 CHS participants who were free of CVD at baseline, consented to genetic testing, and had DNA available for genotyping.

A total of 1908 persons were excluded from the GWAS study sample due to the presence at study baseline of coronary heart disease, congestive heart failure, peripheral vascular disease, valvular heart disease, stroke or transient ischemic attack or lack of available DNA. Because the other cohorts were predominantly white, the

African American participants were excluded from this analysis to reduce the possibility of confounding by population structure.

In CHS, genotyping was performed at the General Clinical Research Center's Phenotyping/Genotyping Laboratory at Cedars-Sinai using the Illumina 370CNV BeadChip system. Genotypes were called using the Illumina BeadStudio software as above. Participants were excluded if they had Samples were excluded from analysis for sex mismatch, discordance with prior genotyping, or call rate < 95%. To date, genome-wide genotyping has been successful among 3,268 of 3,373 white participants on whom genotyping was attempted; the latter constitute the CHS sample for this study.

In CHS, the following exclusions were applied to identify a final set of 306,655 autosomal SNPs: call rate < 97%, HWE  $P < 10^{-5}$ , > 2 duplicate errors or Mendelian inconsistencies (for reference CEPH trios), heterozygote frequency = 0, SNP not found in HapMap.

Imputation was performed using BIMBAM v0.99 with reference to HapMap CEU using release 22, build 36 using one round of imputations and the default expectation-maximization warm-ups and runs.

CHS was approved by institutional review committees at each site, the subjects gave informed consent, and those included in the present analysis consented to the use of their genetic information for the study of cardiovascular disease.

**FHS (Framingham Heart Study):** The FHS is a three-generation, single-site, community-based, ongoing cohort study that was initiated in 1948 to investigate prospectively the risk factors for CVD including stroke. It now comprises 3 generations of participants (N=10,333): the Original cohort followed since 1948; their Offspring and spouses of the Offspring, followed since 1971; and children from the largest Offspring families enrolled in 2000 (Gen 3). Gen 3 participants were not included in this analysis since they are young (mean age  $40 \pm 9$  years at enrollment) and few have suffered strokes. The Original cohort enrolled 5209 men and women who comprised two-thirds of the adult population then residing in Framingham, MA. Survivors continue to receive biennial examinations and have completed 31 examinations. The Offspring cohort comprises 5124 persons (including 3514 biological offspring) who have been examined approximately once every 4 years for a total of 9 examinations. The population of Framingham was virtually entirely white (Europeans of English, Scots, Irish and Italian descent) in 1948 when the Original cohort was recruited. At the initial examination participants were asked for country of birth. At a later examination (the 8th) the Offspring cohort participants were asked to identify their race from the following choices: Caucasian or white, African-American or black, Asian, Native Hawaiian or other Pacific Islander, American Indian or Alaska native or 'prefer not to answer'. They were also asked to identify their ethnicity as either 'Hispanic or Latino' or neither. Almost all the FHS Original and Offspring participants are white/Caucasian and none were excluded from the discovery cohort. FHS participants had DNA extracted and provided consent for genotyping in the 1990s. All available eligible participants were genotyped at Affymetrix (Santa Clara, CA) through an NHLBI funded SNP-Health Association Resource (SHARe) project using the Affymetrix GeneChip® Human Mapping 500K Array Set and 50K Human Gene Focused Panel.® In 272 persons (31 with stroke), small amounts of DNA were extracted from stored whole blood and required whole genome amplification prior to genotyping. Cell lines were available for most of the remaining participants. Genotyping was successful in 5282 participants (2888 women, mean age  $66.1 \pm 12.6$  years). We also excluded 155 persons with prevalent ischemic stroke and 184 persons who did not have stroke surveillance on follow-up after genotyping; the remaining 4,371 subjects constitute the FHS sample for this study in whom we observed 198 incident ischemic strokes. Our stroke surveillance methods and protocols for determining the diagnosis and type of stroke have been previously published. All clinical events were ascertained by 2 or more neurologists at a consensus review. Stroke was defined as an acute onset focal neurological deficit of presumed or definite vascular etiology, persisting for more than 24 hours. An ischemic stroke was diagnosed if CT or MRI imaging confirmed an infarction or if CT showed no evidence of hemorrhage in the presence of a clinically definite stroke. We also utilized the data on clinical features and when available, examinations by Framingham study neurologists, brain MRI and CT, carotid ultrasound or MR angiography, echocardiography, ECG, cardiac monitoring, medication use, other laboratory criteria, other noninvasive vascular studies and information from lumbar puncture or autopsy studies to determine stroke subtype utilizing criteria analogous to the TOAST criteria. Ischemic strokes were thus further categorized as atherothrombotic (large artery or lacunar) or cardioembolic based on all available information.

#### **Rotterdam Study:**

The Rotterdam Study is a population-based cohort study among inhabitants of a district of Rotterdam (Ommoord), The Netherlands, and aims to examine the determinants of disease and health in the elderly with a focus on neurogeriatric, cardiovascular, bone, and eye disease.<sup>18</sup> All inhabitants aged  $\geq 55$  years (n = 10,275) were invited and the participation rate was 78%, yielding a total of 7983 subjects. All participants gave written informed consent to retrieve information from treating physicians. Baseline measurements were obtained from 1990 to 1993 and consisted of an interview at home and two visits to the research center for physical examination. At this baseline examination ancestry was determined by self-report. Participants were asked to identify with one of the following categories that best described their ancestry: Dutch, Caucasian, Asian, Indian,

Indonesian, Mediterranean, Negroid. Less than 1% of participants chose an ancestry other than Dutch or Caucasian. All Rotterdam study participants were included in the discovery cohort. Survivors have been re-examined three times: in 1993-1995, 1997-1999, and 2002-2004. All persons attending the baseline examination in 1990-93 consented to genotyping and had DNA extracted. This DNA was genotyped using the Illumina Infinium II HumanHap550chip v3.0@ array in 2007-2008 according to the manufacturer's protocols. Genotyping was attempted in persons with high-quality extracted DNA (n=6449). From these 6449, samples with low call rate (<97.5%, n=209), with excess autosomal heterozygosity (> 0.336, n=21), with sex-mismatch (n=36), or if there were outliers identified by the IBS clustering analysis (>3 standard deviations from population mean, n=102 or IBS probabilities > 97%, n=129) were excluded from the study population with some persons meeting more than one exclusion criterion; in total, 5974 samples were available with good quality genotyping data. Of these, 170 persons were excluded for prevalent stroke and 41 persons for lack of adequate follow-up after genotyping. The remaining 5763 persons constitute the Rotterdam Study sample for the present analyses. All participants have been continuously monitored for major events (including stroke) through automated linkage of the study database with files from general practitioners and the municipality. In addition physician files from nursing homes and general practitioner records of participants who moved out of the Ommoord district were reviewed twice a year. For suspected stroke and TIA events, additional information (including neuroimaging) was obtained from hospital records and research physicians discussed available information with an experienced stroke neurologist to verify all diagnoses.<sup>19, 20</sup> Follow-up was complete up to January 1, 2009.

## **Membership of Wellcome Trust Case Control Consortium 2**

### Management Committee

Peter Donnelly (Chair)<sup>1,2</sup>, Ines Barroso (Deputy Chair)<sup>3</sup>, Jenefer M Blackwell<sup>4,5</sup>, Elvira Bramon<sup>6</sup>, Matthew A Brown<sup>7</sup>, Juan P Casas<sup>8</sup>, Aiden Corvin<sup>9</sup>, Panos Deloukas<sup>3</sup>, Audrey Duncanson<sup>10</sup>, Janusz Jankowski<sup>11</sup>, Hugh S Markus<sup>12</sup>, Christopher G Mathew<sup>13</sup>, Colin NA Palmer<sup>14</sup>, Robert Plomin<sup>15</sup>, Anna Rautanen<sup>1</sup>, Stephen J Sawcer<sup>16</sup>, Richard C Trembath<sup>13</sup>, Ananth C Viswanathan<sup>17</sup>, Nicholas W Wood<sup>18</sup>

### Data and Analysis Group

Chris C A Spencer<sup>1</sup>, Gavin Band<sup>1</sup>, Céline Bellenguez<sup>1</sup>, Colin Freeman<sup>1</sup>, Garrett Hellenthal<sup>1</sup>, Eleni Giannoulou<sup>1</sup>, Matti Pirinen<sup>1</sup>, Richard Pearson<sup>1</sup>, Amy Strange<sup>1</sup>, Zhan Su<sup>1</sup>, Damjan Vukcevic<sup>1</sup>, Peter Donnelly<sup>1,2</sup>

### DNA, Genotyping, Data QC and Informatics Group

Cordelia Langford<sup>3</sup>, Sarah E Hunt<sup>3</sup>, Sarah Edkins<sup>3</sup>, Rhian Gwilliam<sup>3</sup>, Hannah Blackburn<sup>3</sup>, Suzannah J Bumpstead<sup>3</sup>, Serge Dronov<sup>3</sup>, Matthew Gillman<sup>3</sup>, Emma Gray<sup>3</sup>, Naomi Hammond<sup>3</sup>, Alagurevathi Jayakumar<sup>3</sup>, Owen T McCann<sup>3</sup>, Jennifer Liddle<sup>3</sup>, Simon C Potter<sup>3</sup>, Radhi Ravindrarajah<sup>3</sup>, Michelle Ricketts<sup>3</sup>, Matthew Waller<sup>3</sup>, Paul Weston<sup>3</sup>, Sara Widaa<sup>3</sup>, Pamela Whittaker<sup>3</sup>, Ines Barroso<sup>3</sup>, Panos Deloukas<sup>3</sup>.

### Publications Committee

Christopher G Mathew (Chair)<sup>13</sup>, Jenefer M Blackwell<sup>4,5</sup>, Matthew A Brown<sup>7</sup>, Aiden Corvin<sup>9</sup>, Chris C A Spencer<sup>1</sup>

1 Wellcome Trust Centre for Human Genetics, University of Oxford, Roosevelt Drive, Oxford OX3 7BN, UK; 2 Dept Statistics, University of Oxford, Oxford OX1 3TG, UK; 3 Wellcome Trust Sanger Institute, Wellcome Trust Genome Campus, Hinxton, Cambridge CB10 1SA, UK; 4 Telethon Institute for Child Health Research, Centre for Child Health Research, University of Western Australia, 100 Roberts Road, Subiaco, Western Australia 6008; 5 Cambridge Institute for Medical Research, University of Cambridge School of Clinical Medicine, Cambridge CB2 0XY, UK; 6 Department of Psychosis Studies, NIHR Biomedical Research Centre for Mental Health at the Institute of Psychiatry, King's College London and The South London and Maudsley NHS Foundation Trust, Denmark Hill, London SE5 8AF, UK; 7 University of Queensland Diamantina Institute, Brisbane, Queensland, Australia; 8 Dept Epidemiology and Population Health, London School of Hygiene and Tropical Medicine, London WC1E 7HT and Dept Epidemiology and Public Health, University College London WC1E 6BT, UK; 9 Neuropsychiatric Genetics Research Group, Institute of Molecular Medicine, Trinity College Dublin, Dublin 2, Eire; 10 Molecular and Physiological Sciences, The Wellcome Trust, London NW1 2BE; 11 Department of Oncology, Old Road Campus, University of Oxford, Oxford OX3 7DQ, UK, Digestive Diseases Centre, Leicester Royal Infirmary, Leicester LE7 7HH, UK and Centre for Digestive Diseases, Queen Mary University of London, London E1 2AD, UK; 12 Clinical Neurosciences, St George's University of London, London SW17 0RE; 13 King's College London Dept Medical and Molecular Genetics, King's Health Partners, Guy's Hospital, London SE1 9RT, UK; 14 Biomedical Research Centre, Ninewells Hospital and Medical School, Dundee DD1 9SY, UK; 15 King's College London Social, Genetic and Developmental Psychiatry Centre, Institute of Psychiatry, Denmark Hill, London SE5 8AF, UK; 16 University of Cambridge Dept Clinical Neurosciences, Addenbrooke's Hospital, Cambridge CB2 0QQ, UK; 17 NIHR Biomedical Research Centre for Ophthalmology, Moorfields Eye Hospital NHS Foundation Trust and UCL Institute of Ophthalmology, London EC1V 2PD, UK; 18 Dept Molecular Neuroscience, Institute of Neurology, Queen Square, London WC1N 3BG, UK.

## Supplementary References

1. Adams HP, Jr., Bendixen BH, Kappelle LJ, Biller J, Love BB, Gordon DL, et al. Classification of subtype of acute ischemic stroke. Definitions for use in a multicenter clinical trial. Toast. Trial of org 10172 in acute stroke treatment. *Stroke; a journal of cerebral circulation*. 1993;24:35-41
2. Bellenguez C, Bevan S, Gschwendtner A, Spencer CC, Burgess AI, Pirinen M, et al. Genome-wide association study identifies a variant in *hdac9* associated with large vessel ischemic stroke. *Nature genetics*. 2012;44:328-333
3. Oliphant A, Barker DL, Stuelpnagel JR, Chee MS. Beadarray technology: Enabling an accurate, cost-effective approach to high-throughput genotyping. *Biotechniques*. 2002;Suppl:56-58, 60-51
4. Anderson CD, Biffi A, Rahman R, Ross OA, Jagiella JM, Kissela B, et al. Common mitochondrial sequence variants in ischemic stroke. *Annals of neurology*. 2011;69:471-480
5. Exploiting common genetic variation to make anticoagulation safer. *Stroke; a journal of cerebral circulation*. 2009;40:S64-66
6. Biffi A, Anderson CD, Desikan RS, Sabuncu M, Cortellini L, Schmansky N, et al. Genetic variation and neuroimaging measures in alzheimer disease. *Archives of neurology*. 2010;67:677-685
7. McEvoy M, Smith W, D'Este C, Duke J, Peel R, Schofield P, et al. Cohort profile: The hunter community study. *International journal of epidemiology*. 2010;39:1452-1463
8. Meschia JF, Nalls M, Matarin M, Brott TG, Brown RD, Jr., Hardy J, et al. Siblings with ischemic stroke study: Results of a genome-wide scan for stroke loci. *Stroke; a journal of cerebral circulation*. 2011;42:2726-2732
9. Chen DT, Worrall BB, Brown RD, Jr., Brott TG, Kissela BM, Olson TS, et al. The impact of privacy protections on recruitment in a multicenter stroke genetics study. *Neurology*. 2005;64:721-724
10. Meschia JF, Barrett KM, Chukwudelunzu F, Brown WM, Case LD, Kissela BM, et al. Interobserver agreement in the trial of org 10172 in acute stroke treatment classification of stroke based on retrospective medical record review. *Journal of stroke and cerebrovascular diseases : the official journal of National Stroke Association*. 2006;15:266-272
11. Meschia JF, Brott TG, Brown RD, Jr., Crook RJ, Frankel M, Hardy J, et al. The ischemic stroke genetics study (isgs) protocol. *BMC Neurol*. 2003;3:4
12. Yadav S, Schanz R, Maheshwari A, Khan MS, Slark J, de Silva R, et al. Bio-repository of DNA in stroke (brains): A study protocol. *BMC medical genetics*. 2011;12:34
13. The atherosclerosis risk in communities (aric) study: Design and objectives. The aric investigators. *American journal of epidemiology*. 1989;129:687-702
14. Rosamond WD, Folsom AR, Chambless LE, Wang CH, McGovern PG, Howard G, et al. Stroke incidence and survival among middle-aged adults: 9-year follow-up of the atherosclerosis risk in communities (aric) cohort. *Stroke; a journal of cerebral circulation*. 1999;30:736-743
15. The national survey of stroke. National institute of neurological and communicative disorders and stroke. *Stroke; a journal of cerebral circulation*. 1981;12:I1-91
16. Ay H, Furie KL, Singhal A, Smith WS, Sorensen AG, Koroshetz WJ. An evidence-based causative classification system for acute ischemic stroke. *Annals of neurology*. 2005;58:688-697
17. Fried LP, Borhani NO, Enright P, Furberg CD, Gardin JM, Kronmal RA, et al. The cardiovascular health study: Design and rationale. *Annals of epidemiology*. 1991;1:263-276
18. Hofman A, van Duijn CM, Franco OH, Ikram MA, Janssen HL, Klaver CC, et al. The rotterdam study: 2012 objectives and design update. *European journal of epidemiology*. 2011;26:657-686

19. Bots ML, Looman SJ, Koudstaal PJ, Hofman A, Hoes AW, Grobbee DE. Prevalence of stroke in the general population. The rotterdam study. *Stroke; a journal of cerebral circulation*. 1996;27:1499-1501
20. Hollander M, Koudstaal PJ, Bots ML, Grobbee DE, Hofman A, Breteler MM. Incidence, risk, and case fatality of first ever stroke in the elderly population. The rotterdam study. *Journal of neurology, neurosurgery, and psychiatry*. 2003;74:317-321



**SUPPLEMENTAL FIGURES**

**Supplementary Figure I: Meta-Analysis of the cGRS in population-based cohorts from CHARGE.** Hazard ratios for all four population-based replication cohorts are displayed as well as the meta-analysis hazard ratio. Between-study heterogeneity was not significant ( $I^2=19.9\%$ )

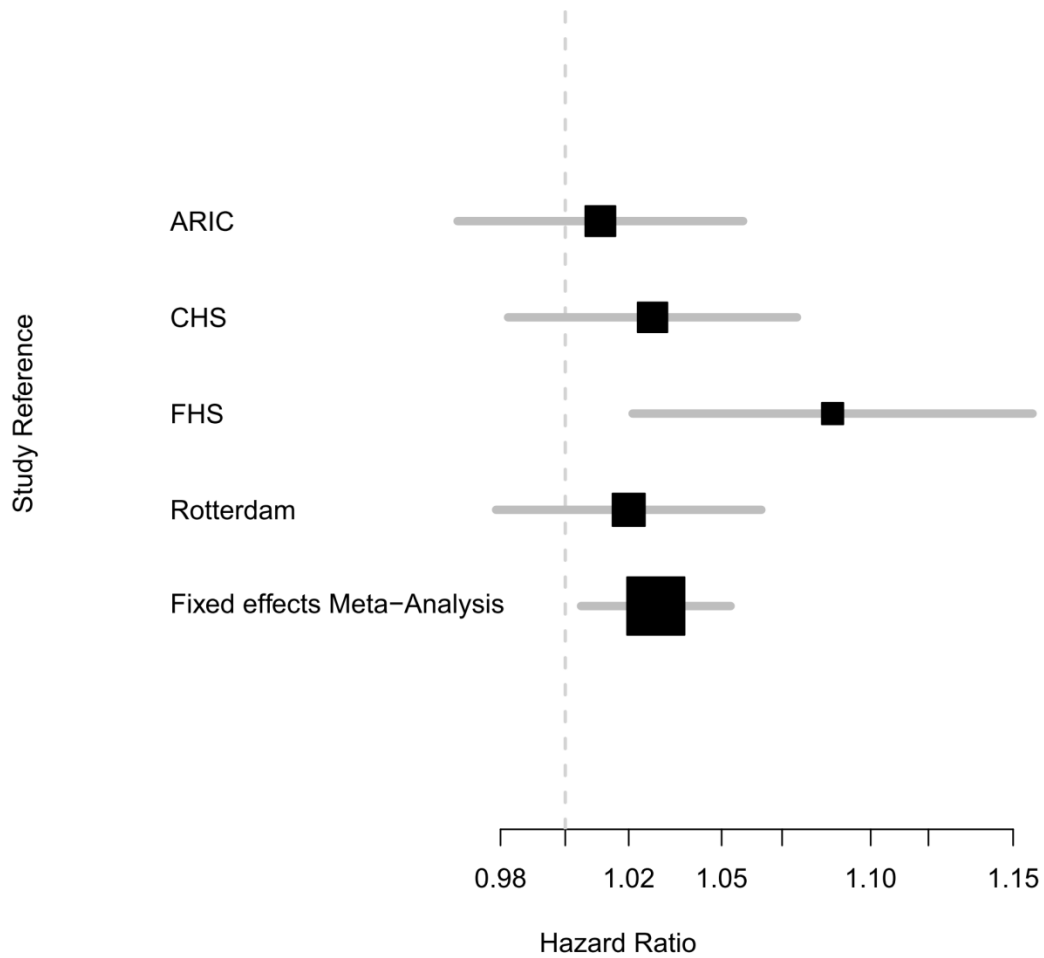

## SUPPLEMENTAL TABLES

**Supplementary Table I.** SNPs considered in the construction of the wGRS

| Disease/trait | Risk factor status    | Chromosomal band | Gene             | SNP/ risk allele | Weight (beta) | Discovery set                                                 | Replication set                                               | PubMed ID | Journal             |
|---------------|-----------------------|------------------|------------------|------------------|---------------|---------------------------------------------------------------|---------------------------------------------------------------|-----------|---------------------|
| alcohol abuse | less well established | 7q31.32          | RPL18P4 - PTPRZ1 | rs10253361-T     | -0,1          | 8,754 European ancestry family members                        | 3,393 Australian individuals                                  | 21529783  | Biol Psychiatry     |
| alcohol abuse | less well established | 9q22.2           | GADD45G - IL6RP1 | rs10908907-G     | 0,1           | 8,754 European ancestry family members                        | 3,393 Australian individuals                                  | 21529783  | Biol Psychiatry     |
| alcohol abuse | less well established | 4q13.3           | MUC7             | rs1109501-G      | 0,1           | 8,754 European ancestry family members                        | 3,393 Australian individuals                                  | 21529783  | Biol Psychiatry     |
| alcohol abuse | less well established | Xp22.2           | CLCN4 - MID1     | rs12388359-T     | 0,1           | 476 European ancestry cases, 1,358 European ancestry controls | 1,024 European ancestry cases, 996 European ancestry controls | 19581569  | Arch Gen Psychiatry |
| alcohol abuse | less well established | 5q15             | ERAP1            | rs13160562-G     | 0,1           | 476 European ancestry cases, 1,358 European ancestry controls | 1,024 European ancestry cases, 996 European ancestry controls | 19581569  | Arch Gen Psychiatry |
| alcohol abuse | less well established | 14q22.1          | DDHD1 - RPS3AP46 | rs1380131-C      | 0,1           | 8,754 European ancestry family members                        | 3,393 Australian individuals                                  | 21529783  | Biol Psychiatry     |
| alcohol abuse | less well established | 5q32             | PPP2R2B          | rs1864982-A      | 0,1           | 476 European ancestry cases, 1,358 European ancestry controls | 1,024 European ancestry cases, 996 European ancestry controls | 19581569  | Arch Gen Psychiatry |
| alcohol abuse | less well established | 1p13.2           | TSPAN2 - NGF     | rs195204-T       | 0,1           | 8,754 European ancestry family members                        | 3,393 Australian individuals                                  | 21529783  | Biol Psychiatry     |
| alcohol abuse | less well established | 6p21.31          | ANKS1A           | rs2140418-C      | 0,1           | 8,754 European ancestry family members                        | 3,393 Australian individuals                                  | 21529783  | Biol Psychiatry     |
| alcohol abuse | less well established | 6p21.31          | ANKS1A           | rs2140418-C      | 0,1           | 8,754 European ancestry family members                        | 3,393 Australian individuals                                  | 21529783  | Biol Psychiatry     |

|               |                       |         |                     |             |      |                                                               |                                                               |          |                          |
|---------------|-----------------------|---------|---------------------|-------------|------|---------------------------------------------------------------|---------------------------------------------------------------|----------|--------------------------|
| alcohol abuse | less well established | 14q21.1 | OR10V7P - YWHAQP1   | rs2154294-G | 0,1  | 8,754 European ancestry family members                        | 3,393 Australian individuals                                  | 21529783 | Biol Psychiatry          |
| alcohol abuse | less well established | 3q22.1  | NPHP3-AS1 - TMEM108 | rs2369955-A | -0,1 | 8,754 European ancestry family members                        | 3,393 Australian individuals                                  | 21529783 | Biol Psychiatry          |
| alcohol abuse | less well established | 7q11.23 | HIP1                | rs237238-A  | 0,1  | 8,754 European ancestry family members                        | 3,393 Australian individuals                                  | 21529783 | Biol Psychiatry          |
| alcohol abuse | less well established | 5p13.1  | DAB2 - PTGER4       | rs2548145-G | -0,1 | 8,754 European ancestry family members                        | 3,393 Australian individuals                                  | 21529783 | Biol Psychiatry          |
| alcohol abuse | less well established | 21q21.1 | NCAM2 - MAPK6PS2    | rs2827312-G | 0,1  | 8,754 European ancestry family members                        | 3,393 Australian individuals                                  | 21529783 | Biol Psychiatry          |
| alcohol abuse | less well established | 14q24.2 | MAP3K9 - PCNX       | rs36563-A   | 0,1  | 476 European ancestry cases, 1,358 European ancestry controls | 1,024 European ancestry cases, 996 European ancestry controls | 19581569 | Arch Gen Psychiatry      |
| alcohol abuse | less well established | 3q27.1  | CHRD - EPHB3        | rs3930234-C | 0,1  | 8,754 European ancestry family members                        | 3,393 Australian individuals                                  | 21529783 | Biol Psychiatry          |
| alcohol abuse | less well established | 21q22.3 | COL6A1 - COL6A2     | rs4293630-A | 0,1  | 8,754 European ancestry family members                        | 3,393 Australian individuals                                  | 21529783 | Biol Psychiatry          |
| alcohol abuse | less well established | 2q23.3  | MMADHC - TRNAE38P   | rs6716455-G | 0,1  | 8,754 European ancestry family members                        | 3,393 Australian individuals                                  | 21529783 | Biol Psychiatry          |
| alcohol abuse | less well established | 2q23.3  | MMADHC - TRNAE38P   | rs6716455-G | 0,1  | 8,754 European ancestry family members                        | 3,393 Australian individuals                                  | 21529783 | Biol Psychiatry          |
| alcohol abuse | less well established | 6q25.1  | ESR1                | rs6902771-C | 0,1  | 476 European ancestry cases, 1,358 European ancestry controls | 1,024 European ancestry cases, 996 European ancestry controls | 19581569 | Arch Gen Psychiatry      |
| alcohol abuse | less well established | 7q11.22 | AUTS2               | rs6943555-A | -0,1 | 26,316 European ancestry individuals                          | 21,185 European ancestry individuals                          | 21471458 | Proc Natl Acad Sci U S A |
| alcohol abuse | less well established | 2q35    | MREG - PECR         | rs7590720-G | 0,1  | 476 European ancestry cases, 1,358 European ancestry controls | 1,024 European ancestry cases, 996 European ancestry controls | 19581569 | Arch Gen Psychiatry      |

|                     |                       |          |                   |              |             |                                                                  |                                                                  |          |                 |
|---------------------|-----------------------|----------|-------------------|--------------|-------------|------------------------------------------------------------------|------------------------------------------------------------------|----------|-----------------|
| alcohol abuse       | less well established | 18q21.2  | DCC               | rs768048-C   | 0,1         | 8,754 European ancestry family members                           | 3,393 Australian individuals                                     | 21529783 | Biol Psychiatry |
| alcohol abuse       | less well established | 15q26.1  | C15orf32          | rs8040009-T  | -0,1        | 8,754 European ancestry family members                           | 3,393 Australian individuals                                     | 21529783 | Biol Psychiatry |
| alcohol abuse       | less well established | 15q26.2  | -                 | rs933769-T   | -0,1        | 8,754 European ancestry family members                           | 3,393 Australian individuals                                     | 21529783 | Biol Psychiatry |
| alcohol abuse       | less well established | 13q12.2  | RASL11A - GTF3A   | rs9512637-C  | -0,1        | 8,754 European ancestry family members                           | 3,393 Australian individuals                                     | 21529783 | Biol Psychiatry |
| alcohol abuse       | less well established | 13q32.1  | MBNL2             | rs9556711-G  | -0,1        | 8,754 European ancestry family members                           | 3,393 Australian individuals                                     | 21529783 | Biol Psychiatry |
| alcohol abuse       | less well established | 13q32.1  | MBNL              | rs9556711-G  | -0,1        | 8,754 European ancestry family members                           | 3,393 Australian individuals                                     | 21529783 | Biol Psychiatry |
| atrial fibrillation | established           | 4q25     | PITX2 - RPL36AP23 | rs10033464-T | 0,3293      | 550 cases,4,476 controls                                         | 3,363 cases,17,616 controls                                      | 17603472 | Nature          |
| atrial fibrillation | established           | 20q13.13 | SULF2 - SRMP1     | rs13038095-T | 0,476234179 | 1,335 European descent cases, 12,844 European descent controls   | 1,164 European descent cases, 3,607 European descent controls    | 20173747 | Nat Genet       |
| atrial fibrillation | established           | 1q21.3   | KCNN3             | rs13376333-T | 0,444686821 | 1,335 European descent cases, 12,844 European descent controls   | 1,164 European descent cases, 3,607 European descent controls    | 20173747 | Nat Genet       |
| atrial fibrillation | established           | 4q25     | PITX2 - RPL36AP23 | rs1448817-G  | 0,350656871 | 550 cases,4,476 controls                                         | 3,363 cases,17,616 controls                                      | 17603472 | Nature          |
| atrial fibrillation | established           | 4q25     | PITX2 - RPL36AP23 | rs16997168-T | 0,223143551 | 550 cases,4,476 controls                                         | 3,363 cases,17,616 controls                                      | 17603472 | Nature          |
| atrial fibrillation | established           | 4q25     | PITX2 - RPL36AP23 | rs17042171-A | 0,50077     | 3,413 cases, 37,105 referents                                    | 2,145 cases, 4,073 controls                                      | 19597492 | Nat Genet       |
| atrial fibrillation | established           | 1p36.22  | MTHFR             | rs17375901-T | 0,231111    | 3,413 cases, 37,105 referents                                    | 2,145 cases, 4,073 controls                                      | 19597492 | Nat Genet       |
| atrial fibrillation | established           | 16q22.3  | ZFHX3             | rs2106261-T  | 0,22314     | 6,707 European ancestry cases, 52,426 European ancestry controls | 5,381 European ancestry cases, 10,030 European ancestry controls | 22544366 | Nat Genet       |

|                     |             |         |                   |              |             |                                                                          |                                                                                                              |          |                         |
|---------------------|-------------|---------|-------------------|--------------|-------------|--------------------------------------------------------------------------|--------------------------------------------------------------------------------------------------------------|----------|-------------------------|
| atrial fibrillation | established | 16q22.3 | ZFHX3             | rs2106261-T  | 0,22314     | 3,413 cases, 37,105 referents                                            | 2,145 cases, 4,073 controls                                                                                  | 19597492 | Nat Genet               |
| atrial fibrillation | established | 4q25    | PITX2 - RPL36AP23 | rs2200733-T  | 0,54232429  | 2,385 European ancestry cases, 33,752 European ancestry controls         | up to 2,427 European ancestry cases, 3,379 European ancestry controls                                        | 19597491 | Nat Genet               |
| atrial fibrillation | established | 4q25    | PITX2 - RPL36AP23 | rs2200733-T  | 0,54232429  | 1,661 cases,10,815 controls                                              | 4,576 cases,19,343 controls                                                                                  | 18991354 | Ann Neurol              |
| atrial fibrillation | established | 4q25    | PITX2 - RPL36AP23 | rs2200733-T  | 0,54232429  | 550 cases,4,476 controls                                                 | 3,363 cases,17,616 controls                                                                                  | 17603472 | Nature                  |
| atrial fibrillation | established | 4q25    | PITX2 - RPL36AP23 | rs2220427-T  | 0,350656871 | 550 cases,4,476 controls                                                 | 3,363 cases,17,616 controls                                                                                  | 17603472 | Nature                  |
| atrial fibrillation | established | 4q25    | PITX2 - RPL36AP23 | rs2723316-T  | 0,182321556 | 550 cases,4,476 controls                                                 | 3,363 cases,17,616 controls                                                                                  | 17603472 | Nature                  |
| atrial fibrillation | established | 4q25    | PITX2 - RPL36AP23 | rs6843082-G  | 0,708035793 | 1,335 European descent cases, 12,844 European descent controls           | 1,164 European descent cases, 3,607 European descent controls                                                | 20173747 | Nat Genet               |
| atrial fibrillation | established | 16q22.3 | ZFHX3             | rs7193343-T  | 0,190620359 | 2,385 European ancestry cases, 33,752 European ancestry controls         | up to 2,427 European ancestry cases, 3,379 European ancestry controls                                        | 19597491 | Nat Genet               |
| atrial fibrillation | established | 4q21    | ARHGAP24          | rs958800-T   | 0,165514438 | 550 cases,4,476 controls                                                 | 3,363 cases,17,616 controls                                                                                  | 17603472 | Nature                  |
| BMI+weight          | established | 14q31.1 | NRXN3             | rs10150332-C | 0,1         | Up to 123,865 European ancestry individuals                              | Up to 125,931 European ancestry individuals                                                                  | 20935630 | Nat Genet               |
| BMI+weight          | established | 3p13    | UQCRHP4 - FOXP1   | rs1024889-G  | 0,1         | Up to 3,925 European individuals                                         | NR                                                                                                           | 19851299 | Obesity (Silver Spring) |
| BMI+weight          | established | 4q26    | TRAM1L1 - RPSAP35 | rs10433903-T | 0,1         | 775 European ancestry cases, 3,197 European ancestry controls            | NR                                                                                                           | 19553259 | Hum Mol Genet           |
| BMI+weight          | established | 10p15.1 | KLF6 - AKR1E2     | rs10458787-G | 0,1         | 11,536 European descent family members                                   | NR                                                                                                           | 20397748 | Twin Res Hum Genet      |
| BMI+weight          | established | 10p13   | FAM188A - PTER    | rs10508503-C | 0,1         | 695 obese adults, 685 obese children, 731 lean adults, 685 lean children | 1,171 obese adults, 896 obese children, 1,114 lean adults, 1,297 lean children, 4,417 adults, 5,291 children | 19151714 | Nat Genet               |
| BMI+weight          | established | 11p14.1 | BDNF              | rs10767664-  | 0,1         | Up to 123,865 European                                                   | Up to 125,931 European                                                                                       | 20935630 | Nat Genet               |

|            |             |          |                    |              |      |                                                                                                          |                                                                                                                                                                 |          |                         |
|------------|-------------|----------|--------------------|--------------|------|----------------------------------------------------------------------------------------------------------|-----------------------------------------------------------------------------------------------------------------------------------------------------------------|----------|-------------------------|
|            |             |          |                    | A            |      | ancestry individuals                                                                                     | ancestry individuals                                                                                                                                            |          |                         |
| BMI+weight | established | 1p21.3   | EEF1A1P11 - RPL7P9 | rs10783050-C | 0,1  | 80,969 individuals                                                                                       | 11,036 individuals                                                                                                                                              | 19079260 | Nat Genet               |
| BMI+weight | established | 11p11.2  | MTCH2              | rs10838738-G | 0,1  | 32,387 individuals                                                                                       | 59,092 individuals                                                                                                                                              | 19079261 | Nat Genet               |
| BMI+weight | established | 12p11.21 | BICD1              | rs10844154-C | 0,1  | Up to 3,925 European individuals                                                                         | NR                                                                                                                                                              | 19851299 | Obesity (Silver Spring) |
| BMI+weight | established | 18q21.32 | RPS3AP49 - MC4R    | rs10871777-A | 0,1  | 1,138 French and German extremely obese children, 1,120 French and German normal or underweight children | 1,892 European ancestry obese or overweight children and adolescents, 3,763 European ancestry normal or underweight controls, 715 families with obese offspring | 20421936 | PLoS Genet              |
| BMI+weight | established | 1q25.2   | SEC16B             | rs10913469-C | 0,1  | 80,969 individuals                                                                                       | 11,036 individuals                                                                                                                                              | 19079260 | Nat Genet               |
| BMI+weight | established | 1q25.2   | SEC16B             | rs10913469-C | 0,1  | 80,969 individuals                                                                                       | 11,036 individuals                                                                                                                                              | 19079260 | Nat Genet               |
| BMI+weight | established | 4p12     | GNPDA2 - GABRG1    | rs10938397-G | 0,1  | Up to 123,865 European ancestry individuals                                                              | Up to 125,931 European ancestry individuals                                                                                                                     | 20935630 | Nat Genet               |
| BMI+weight | established | 4p12     | GNPDA2 - GABRG1    | rs10938397-G | 0,1  | 32,387 individuals                                                                                       | 59,092 individuals                                                                                                                                              | 19079261 | Nat Genet               |
| BMI+weight | established | 9p21.1   | LINGO2             | rs10968576-G | 0,1  | Up to 123,865 European ancestry individuals                                                              | Up to 125,931 European ancestry individuals                                                                                                                     | 20935630 | Nat Genet               |
| BMI+weight | established | 9p13.3   | FAM214B - UNC13B   | rs10972341-G | 0,1  | Up to 3,925 European individuals                                                                         | NR                                                                                                                                                              | 19851299 | Obesity (Silver Spring) |
| BMI+weight | established | 10q22.1  | PALD1 - PRF1       | rs10999409-T | 0,1  | 775 European ancestry cases, 3,197 European ancestry controls                                            | NR                                                                                                                                                              | 19553259 | Hum Mol Genet           |
| BMI+weight | established | 19q13.11 | KCTD15 - RPS4XP20  | rs11084753-G | 0,1  | 32,387 individuals                                                                                       | 59,092 individuals                                                                                                                                              | 19079261 | Nat Genet               |
| BMI+weight | established | 16q12.2  | FTO                | rs1121980-T  | 0,1  | 16,876 individuals                                                                                       | 60,352 individuals                                                                                                                                              | 18454148 | Nat Genet               |
| BMI+weight | established | 16q12.2  | FTO                | rs1121980-T  | 0,1  | 487 young cases, 442 controls                                                                            | 2,269 individuals in 644 families                                                                                                                               | 18159244 | PLoS One                |
| BMI+weight | established | 3q28     | LPP                | rs1152846-G  | -0,1 | Up to 3,925 European individuals                                                                         | NR                                                                                                                                                              | 19851299 | Obesity (Silver Spring) |
| BMI+weight | established | 3q28     | LPP                | rs1152846-   | -0,1 | Up to 3,925 European                                                                                     | NR                                                                                                                                                              | 19851299 | Obesity (Silver         |

|            |             |          |                 |              |      |                                                                          |                                                                                                              |          |                         |
|------------|-------------|----------|-----------------|--------------|------|--------------------------------------------------------------------------|--------------------------------------------------------------------------------------------------------------|----------|-------------------------|
|            |             |          |                 | G            |      | individuals                                                              |                                                                                                              |          | Spring)                 |
| BMI+weight | established | 14q12    | PRKD1 - RPS6P24 | rs11847697-T | 0,1  | Up to 123,865 European ancestry individuals                              | Up to 125,931 European ancestry individuals                                                                  | 20935630 | Nat Genet               |
| BMI+weight | established | 11p14.2  | ANO3            | rs12295638-C | 0,1  | 775 European ancestry cases, 3,197 European ancestry controls            | NR                                                                                                           | 19553259 | Hum Mol Genet           |
| BMI+weight | established | 16p12.3  | GPRC5B - GPR139 | rs12444979-C | 0,1  | Up to 123,865 European ancestry individuals                              | Up to 125,931 European ancestry individuals                                                                  | 20935630 | Nat Genet               |
| BMI+weight | established | 5q35.3   | OR2Y1 - MGAT1   | rs12517906-G | -0,1 | Up to 3,925 European individuals                                         | NR                                                                                                           | 19851299 | Obesity (Silver Spring) |
| BMI+weight | established | 5q35.3   | OR2Y1 - MGAT1   | rs12517906-G | -0,1 | Up to 3,925 European individuals                                         | NR                                                                                                           | 19851299 | Obesity (Silver Spring) |
| BMI+weight | established | 3p24.3   | RFTN1           | rs12635698-C | 0,1  | 775 European ancestry cases, 3,197 European ancestry controls            | NR                                                                                                           | 19553259 | Hum Mol Genet           |
| BMI+weight | established | 18q21.32 | RPS3AP49 - MC4R | rs12970134-A | 0,1  | 80,969 individuals                                                       | 11,036 individuals                                                                                           | 19079260 | Nat Genet               |
| BMI+weight | established | 18q21.32 | RPS3AP49 - MC4R | rs12970134-A | 0,1  | 80,969 individuals                                                       | 11,036 individuals                                                                                           | 19079260 | Nat Genet               |
| BMI+weight | established | 3p12.1   | CADM2           | rs13078807-G | 0,1  | Up to 123,865 European ancestry individuals                              | Up to 125,931 European ancestry individuals                                                                  | 20935630 | Nat Genet               |
| BMI+weight | established | 4q24     | SLC39A8         | rs13107325-T | 0,1  | Up to 123,865 European ancestry individuals                              | Up to 125,931 European ancestry individuals                                                                  | 20935630 | Nat Genet               |
| BMI+weight | established | 16q12.2  | FTO             | rs1421085-C  | 0,1  | 695 obese adults, 685 obese children, 731 lean adults, 685 lean children | 1,171 obese adults, 896 obese children, 1,114 lean adults, 1,297 lean children, 4,417 adults, 5,291 children | 19151714 | Nat Genet               |
| BMI+weight | established | 16q23.2  | MAF - DYNLRB2   | rs1424233-A  | 0,1  | 695 obese adults, 685 obese children, 731 lean adults, 685 lean children | 1,171 obese adults, 896 obese children, 1,114 lean adults, 1,297 lean children, 4,417 adults, 5,291 children | 19151714 | Nat Genet               |
| BMI+weight | established | 3p24.2   | RARB            | rs1435703-T  | 0,1  | 775 European ancestry cases, 3,197 European ancestry controls            | NR                                                                                                           | 19553259 | Hum Mol Genet           |
| BMI+weight | established | 11q14.1  | TENM4 - RPS28P7 | rs1458095-G  | 0,1  | Up to 3,925 European individuals                                         | NR                                                                                                           | 19851299 | Obesity (Silver Spring) |

|            |             |          |                       |              |      |                                                                                                          |                                                                                                                                                                 |          |                         |
|------------|-------------|----------|-----------------------|--------------|------|----------------------------------------------------------------------------------------------------------|-----------------------------------------------------------------------------------------------------------------------------------------------------------------|----------|-------------------------|
| BMI+weight | established | 1p31.1   | TNNI3K;FPGT-TNNI3K    | rs1514175-A  | 0,1  | Up to 123,865 European ancestry individuals                                                              | Up to 125,931 European ancestry individuals                                                                                                                     | 20935630 | Nat Genet               |
| BMI+weight | established | 1p21.3   | EEF1A1P11 - RPL7P9    | rs1555543-C  | 0,1  | Up to 123,865 European ancestry individuals                                                              | Up to 125,931 European ancestry individuals                                                                                                                     | 20935630 | Nat Genet               |
| BMI+weight | established | 16q12.2  | FTO                   | rs1558902-A  | 0,1  | 31,373 European ancestry individuals                                                                     | 38,641 European ancestry individuals                                                                                                                            | 19557197 | PLoS Genet              |
| BMI+weight | established | 16q12.2  | FTO                   | rs1558902-A  | 0,1  | Up to 123,865 European ancestry individuals                                                              | Up to 125,931 European ancestry individuals                                                                                                                     | 20935630 | Nat Genet               |
| BMI+weight | established | 16q12.2  | FTO                   | rs1558902-A  | 0,1  | 1,138 French and German extremely obese children, 1,120 French and German normal or underweight children | 1,892 European ancestry obese or overweight children and adolescents, 3,763 European ancestry normal or underweight controls, 715 families with obese offspring | 20421936 | PLoS Genet              |
| BMI+weight | established | 18q21.32 | RPS3AP49 - MC4R       | rs17782313-C | 0,1  | 695 obese adults, 685 obese children, 731 lean adults, 685 lean children                                 | 1,171 obese adults, 896 obese children, 1,114 lean adults, 1,297 lean children, 4,417 adults, 5,291 children                                                    | 19151714 | Nat Genet               |
| BMI+weight | established | 18q21.32 | RPS3AP49 - MC4R       | rs17782313-C | 0,1  | 32,387 individuals                                                                                       | 59,092 individuals                                                                                                                                              | 19079261 | Nat Genet               |
| BMI+weight | established | 18q21.32 | RPS3AP49 - MC4R       | rs17782313-C | 0,1  | 16,876 individuals                                                                                       | 60,352 individuals                                                                                                                                              | 18454148 | Nat Genet               |
| BMI+weight | established | 18q21.32 | RPS3AP49 - MC4R       | rs17782313-C | 0,1  | 133,653 European ancestry individuals                                                                    | 50,074 European ancestry individuals                                                                                                                            | 20881960 | Nature                  |
| BMI+weight | established | 18q11.2  | NPC1                  | rs1805081-A  | 0,1  | 695 obese adults, 685 obese children, 731 lean adults, 685 lean children                                 | 1,171 obese adults, 896 obese children, 1,114 lean adults, 1,297 lean children, 4,417 adults, 5,291 children                                                    | 19151714 | Nat Genet               |
| BMI+weight | established | 10q22.1  | ADAMTS14              | rs1816002-G  | 0,1  | Up to 3,925 European individuals                                                                         | NR                                                                                                                                                              | 19851299 | Obesity (Silver Spring) |
| BMI+weight | established | 18q11.2  | ZNF521 - SS18         | rs1840440-G  | 0,1  | Up to 3,925 European individuals                                                                         | NR                                                                                                                                                              | 19851299 | Obesity (Silver Spring) |
| BMI+weight | established | 19q13.41 | SIGLEC23P - SIGLEC24P | rs1878047-G  | -0,1 | Up to 3,925 European individuals                                                                         | NR                                                                                                                                                              | 19851299 | Obesity (Silver Spring) |
| BMI+weight | established | 9p22.3   | HMG2N2P16 -           | rs1927702-   | 0,1  | Up to 3,925 European                                                                                     | NR                                                                                                                                                              | 19851299 | Obesity (Silver         |



|            |             |          |                        |             |      |                                                               |                                             |          |                         |
|------------|-------------|----------|------------------------|-------------|------|---------------------------------------------------------------|---------------------------------------------|----------|-------------------------|
|            |             |          | BNC2                   | G           |      | individuals                                                   |                                             |          | Spring)                 |
| BMI+weight | established | 1p21.3   | EEF1A1P11 - RPL7P9     | rs1973993-C | 0,1  | 80,969 individuals                                            | 11,036 individuals                          | 19079260 | Nat Genet               |
| BMI+weight | established | 6p21.31  | NUDT3;RPS10-NUDT3      | rs206936-G  | 0,1  | Up to 123,865 European ancestry individuals                   | Up to 125,931 European ancestry individuals | 20935630 | Nat Genet               |
| BMI+weight | established | 5q13.3   | POC5                   | rs2112347-T | 0,1  | Up to 123,865 European ancestry individuals                   | Up to 125,931 European ancestry individuals | 20935630 | Nat Genet               |
| BMI+weight | established | 5q23.2   | CEP120                 | rs2115172-A | 0,1  | 80,969 individuals                                            | 11,036 individuals                          | 19079260 | Nat Genet               |
| BMI+weight | established | 15q23    | MAP2K5                 | rs2241423-G | 0,1  | Up to 123,865 European ancestry individuals                   | Up to 125,931 European ancestry individuals | 20935630 | Nat Genet               |
| BMI+weight | established | 6p21.31  | MLN                    | rs2274459-A | 0,1  | 775 European ancestry cases, 3,197 European ancestry controls | NR                                          | 19553259 | Hum Mol Genet           |
| BMI+weight | established | 6q22.33  | MESTP1 - ARHGAP18      | rs2275215-T | -0,1 | 11,536 European descent family members                        | NR                                          | 20397748 | Twin Res Hum Genet      |
| BMI+weight | established | 19q13.32 | QPCTL                  | rs2287019-C | 0,1  | Up to 123,865 European ancestry individuals                   | Up to 125,931 European ancestry individuals | 20935630 | Nat Genet               |
| BMI+weight | established | 4q34.3   | RPL19P8 - MGC45800     | rs2383393-G | 0,1  | Up to 3,925 European individuals                              | NR                                          | 19851299 | Obesity (Silver Spring) |
| BMI+weight | established | 1p31.1   | NEGR1 - RPL31P12       | rs2568958-A | 0,1  | 80,969 individuals                                            | 11,036 individuals                          | 19079260 | Nat Genet               |
| BMI+weight | established | 1p31.1   | NEGR1 - RPL31P12       | rs2568958-A | 0,1  | 80,969 individuals                                            | 11,036 individuals                          | 19079260 | Nat Genet               |
| BMI+weight | established | 1q41     | LYPLAL1 - ZC3H11B      | rs2605100-G | 0,1  | 38,580 European ancestry individuals                          | Up to 102,064 European ancestry individuals | 19557161 | PLoS Genet              |
| BMI+weight | established | 13q12.12 | C1QTNF9B - ANKRD20A19P | rs2765086-G | -0,1 | Up to 3,925 European individuals                              | NR                                          | 19851299 | Obesity (Silver Spring) |
| BMI+weight | established | 1p31.1   | RPL31P12 - KRT8P21     | rs2815752-A | 0,1  | Up to 123,865 European ancestry individuals                   | Up to 125,931 European ancestry individuals | 20935630 | Nat Genet               |
| BMI+weight | established | 1p31.1   | RPL31P12 - KRT8P21     | rs2815752-A | 0,1  | 32,387 individuals                                            | 59,092 individuals                          | 19079261 | Nat Genet               |
| BMI+weight | established | 6p21.33  | NCR3 - UQCRHP1         | rs2844479-T | 0,1  | 80,969 individuals                                            | 11,036 individuals                          | 19079260 | Nat Genet               |
| BMI+weight | established | 2p25.3   | FAM150B - TMEM18       | rs2867125-C | 0,1  | Up to 123,865 European ancestry individuals                   | Up to 125,931 European ancestry individuals | 20935630 | Nat Genet               |
| BMI+weight | established | 2q22.2   | RPS16P3 - KYNU         | rs2890652-C | 0,1  | Up to 123,865 European ancestry individuals                   | Up to 125,931 European ancestry individuals | 20935630 | Nat Genet               |

|            |             |          |                   |             |      |                                                               |                                             |          |                         |
|------------|-------------|----------|-------------------|-------------|------|---------------------------------------------------------------|---------------------------------------------|----------|-------------------------|
| BMI+weight | established | 19q13.11 | KCTD15 - RPS4XP20 | rs29941-C   | 0,1  | 80,969 individuals                                            | 11,036 individuals                          | 19079260 | Nat Genet               |
| BMI+weight | established | 19q13.11 | KCTD15 - RPS4XP20 | rs29941-C   | 0,1  | 80,969 individuals                                            | 11,036 individuals                          | 19079260 | Nat Genet               |
| BMI+weight | established | 19q13.11 | KCTD15 - RPS4XP20 | rs29941-C   | 0,1  | Up to 123,865 European ancestry individuals                   | Up to 125,931 European ancestry individuals | 20935630 | Nat Genet               |
| BMI+weight | established | 5q23.3   | FBN2              | rs374748-G  | 0,1  | 775 European ancestry cases, 3,197 European ancestry controls | NR                                          | 19553259 | Hum Mol Genet           |
| BMI+weight | established | 19p13.3  | AP3D1 - DOT1L     | rs3803915-C | -0,1 | Up to 3,925 European individuals                              | NR                                          | 19851299 | Obesity (Silver Spring) |
| BMI+weight | established | 19q13.32 | ZC3H4             | rs3810291-A | 0,1  | Up to 123,865 European ancestry individuals                   | Up to 125,931 European ancestry individuals | 20935630 | Nat Genet               |
| BMI+weight | established | 11p11.2  | MTCH2             | rs3817334-T | 0,1  | Up to 123,865 European ancestry individuals                   | Up to 125,931 European ancestry individuals | 20935630 | Nat Genet               |
| BMI+weight | established | 1p36.33  | AGRN - C1orf159   | rs3934834-G | 0,1  | Up to 3,925 European individuals                              | NR                                          | 19851299 | Obesity (Silver Spring) |
| BMI+weight | established | 13q12.2  | MTIF3             | rs4771122-G | 0,1  | Up to 123,865 European ancestry individuals                   | Up to 125,931 European ancestry individuals | 20935630 | Nat Genet               |
| BMI+weight | established | 5q23.2   | RPL28P3 - RPSAP37 | rs4836133-A | 0,1  | Up to 123,865 European ancestry individuals                   | Up to 125,931 European ancestry individuals | 20935630 | Nat Genet               |
| BMI+weight | established | 11p15.4  | STK33             | rs4929949-C | 0,1  | Up to 123,865 European ancestry individuals                   | Up to 125,931 European ancestry individuals | 20935630 | Nat Genet               |
| BMI+weight | established | 1q25.2   | FAM5B - SEC16B    | rs543874-G  | 0,1  | Up to 123,865 European ancestry individuals                   | Up to 125,931 European ancestry individuals | 20935630 | Nat Genet               |
| BMI+weight | established | 18q21.32 | RPS3AP49 - MC4R   | rs571312-A  | 0,1  | Up to 123,865 European ancestry individuals                   | Up to 125,931 European ancestry individuals | 20935630 | Nat Genet               |
| BMI+weight | established | 20p12.1  | MACROD2           | rs6110577-C | 0,1  | 775 European ancestry cases, 3,197 European ancestry controls | NR                                          | 19553259 | Hum Mol Genet           |
| BMI+weight | established | 11p14.1  | BDNF              | rs6265-G    | 0,1  | 80,969 individuals                                            | 11,036 individuals                          | 19079260 | Nat Genet               |
| BMI+weight | established | 11p14.1  | BDNF              | rs6265-G    | 0,1  | 80,969 individuals                                            | 11,036 individuals                          | 19079260 | Nat Genet               |
| BMI+weight | established | 16q12.2  | FTO               | rs6499640-A | 0,1  | 80,969 individuals                                            | 11,036 individuals                          | 19079260 | Nat Genet               |
| BMI+weight | established | 16q12.2  | FTO               | rs6499640-A | 0,1  | 80,969 individuals                                            | 11,036 individuals                          | 19079260 | Nat Genet               |
| BMI+weight | established | 2p25.3   | FAM150B -         | rs6548238-  | 0,1  | 32,387 individuals                                            | 59,092 individuals                          | 19079261 | Nat Genet               |

|            |             |          |                     |             |     |                                                               |                                             |          |                         |
|------------|-------------|----------|---------------------|-------------|-----|---------------------------------------------------------------|---------------------------------------------|----------|-------------------------|
|            |             |          | TMEM18              | C           |     |                                                               |                                             |          |                         |
| BMI+weight | established | 2p16.1   | EML6                | rs6726292-G | 0,1 | 775 European ancestry cases, 3,197 European ancestry controls | NR                                          | 19553259 | Hum Mol Genet           |
| BMI+weight | established | 2p23.3   | ADCY3 - DNAJC27     | rs713586-C  | 0,1 | Up to 123,865 European ancestry individuals                   | Up to 125,931 European ancestry individuals | 20935630 | Nat Genet               |
| BMI+weight | established | 12q13.12 | BCDIN3D - RPL35AP28 | rs7138803-A | 0,1 | 31,373 European ancestry individuals                          | 38,641 European ancestry individuals        | 19557197 | PLoS Genet              |
| BMI+weight | established | 12q13.12 | BCDIN3D - RPL35AP28 | rs7138803-A | 0,1 | Up to 123,865 European ancestry individuals                   | Up to 125,931 European ancestry individuals | 20935630 | Nat Genet               |
| BMI+weight | established | 12q13.12 | BCDIN3D - RPL35AP28 | rs7138803-A | 0,1 | 80,969 individuals                                            | 11,036 individuals                          | 19079260 | Nat Genet               |
| BMI+weight | established | 12q13.12 | BCDIN3D - RPL35AP28 | rs7138803-A | 0,1 | 80,969 individuals                                            | 11,036 individuals                          | 19079260 | Nat Genet               |
| BMI+weight | established | 17q24.1  | CEP112              | rs7209395-G | 0,1 | Up to 3,925 European individuals                              | NR                                          | 19851299 | Obesity (Silver Spring) |
| BMI+weight | established | 13q12.2  | MTIF3 - LNX2        | rs7336332-G | 0,1 | 80,969 individuals                                            | 11,036 individuals                          | 19079260 | Nat Genet               |
| BMI+weight | established | 16p11.2  | SH2B1               | rs7359397-T | 0,1 | Up to 123,865 European ancestry individuals                   | Up to 125,931 European ancestry individuals | 20935630 | Nat Genet               |
| BMI+weight | established | 10p11.21 | MTRNR2L7 - TLK2P2   | rs7474896-T | 0,1 | 775 European ancestry cases, 3,197 European ancestry controls | NR                                          | 19553259 | Hum Mol Genet           |
| BMI+weight | established | 11p14.1  | BDNF-AS             | rs7481311-T | 0,1 | 80,969 individuals                                            | 11,036 individuals                          | 19079260 | Nat Genet               |
| BMI+weight | established | 11p14.1  | BDNF-AS             | rs7481311-T | 0,1 | 80,969 individuals                                            | 11,036 individuals                          | 19079260 | Nat Genet               |
| BMI+weight | established | 16p11.2  | SH2B1               | rs7498665-G | 0,1 | 80,969 individuals                                            | 11,036 individuals                          | 19079260 | Nat Genet               |
| BMI+weight | established | 16p11.2  | SH2B1               | rs7498665-G | 0,1 | 80,969 individuals                                            | 11,036 individuals                          | 19079260 | Nat Genet               |
| BMI+weight | established | 16p11.2  | SH2B1               | rs7498665-G | 0,1 | 32,387 individuals                                            | 59,092 individuals                          | 19079261 | Nat Genet               |
| BMI+weight | established | 2p25.3   | FAM150B - TMEM18    | rs7561317-G | 0,1 | 80,969 individuals                                            | 11,036 individuals                          | 19079260 | Nat Genet               |
| BMI+weight | established | 2p25.3   | FAM150B - TMEM18    | rs7561317-G | 0,1 | 80,969 individuals                                            | 11,036 individuals                          | 19079260 | Nat Genet               |

|            |             |         |                   |             |      |                                                                               |                                             |          |                           |
|------------|-------------|---------|-------------------|-------------|------|-------------------------------------------------------------------------------|---------------------------------------------|----------|---------------------------|
| BMI+weight | established | 2q33.3  | NRP2 - INO80D     | rs7603514-A | 0,1  | 775 European ancestry cases, 3,197 European ancestry controls                 | NR                                          | 19553259 | Hum Mol Genet             |
| BMI+weight | established | 3q27.2  | ETV5 - DGKG       | rs7647305-C | 0,1  | 80,969 individuals                                                            | 11,036 individuals                          | 19079260 | Nat Genet                 |
| BMI+weight | established | 3q27.2  | ETV5 - DGKG       | rs7647305-C | 0,1  | 80,969 individuals                                                            | 11,036 individuals                          | 19079260 | Nat Genet                 |
| BMI+weight | established | 8p23.1  | TNKS - MSRA       | rs7826222-G | 0,1  | 38,580 European ancestry individuals                                          | Up to 102,064 European ancestry individuals | 19557161 | PLoS Genet                |
| BMI+weight | established | 10q22.2 | DUPD1             | rs7919006-G | -0,1 | Up to 3,925 European individuals                                              | NR                                          | 19851299 | Obesity (Silver Spring)   |
| BMI+weight | established | 16q12.2 | FTO               | rs8050136-A | 0,1  | 2,272 Caucasian individuals, 933 Norwegian individuals                        | 502 non-Hispanic whites                     | 21037115 | Am J Respir Cell Mol Biol |
| BMI+weight | established | 16q12.2 | FTO               | rs8050136-A | 0,1  | 80,969 individuals                                                            | 11,036 individuals                          | 19079260 | Nat Genet                 |
| BMI+weight | established | 16q12.2 | FTO               | rs8050136-A | 0,1  | 80,969 individuals                                                            | 11,036 individuals                          | 19079260 | Nat Genet                 |
| BMI+weight | established | 16q12.2 | FTO               | rs8050136-A | 0,1  | 29,069 European ancestry individuals, 7,557 Asian Indian ancestry individuals | 39,576 European ancestry individuals        | 21706003 | Nat Genet                 |
| BMI+weight | established | 2q36.1  | RPL23P5 - HSPA9P1 | rs824931-G  | 0,1  | Up to 3,925 European individuals                                              | NR                                          | 19851299 | Obesity (Silver Spring)   |
| BMI+weight | established | 2p16.1  | EIF3FP3 - BCL11A  | rs887912-T  | 0,1  | Up to 123,865 European ancestry individuals                                   | Up to 125,931 European ancestry individuals | 20935630 | Nat Genet                 |
| BMI+weight | established | 3q25.31 | LEKR1 - CCNL1     | rs900400-C  | -0,1 | 10,623 European descent individuals                                           | 27,591 European descent individuals         | 20372150 | Nat Genet                 |
| BMI+weight | established | 11p14.1 | BDNF-AS           | rs925946-T  | 0,1  | 80,969 individuals                                                            | 11,036 individuals                          | 19079260 | Nat Genet                 |
| BMI+weight | established | 11p14.1 | BDNF-AS           | rs925946-T  | 0,1  | 80,969 individuals                                                            | 11,036 individuals                          | 19079260 | Nat Genet                 |
| BMI+weight | established | 3q27.2  | ETV5 - DGKG       | rs9816226-T | 0,1  | Up to 123,865 European ancestry individuals                                   | Up to 125,931 European ancestry individuals | 20935630 | Nat Genet                 |
| BMI+weight | established | 6p12.3  | TFAP2B            | rs987237-G  | 0,1  | Up to 123,865 European ancestry individuals                                   | Up to 125,931 European ancestry individuals | 20935630 | Nat Genet                 |
| BMI+weight | established | 6p12.3  | TFAP2B            | rs987237-G  | 0,1  | 38,580 European ancestry individuals                                          | Up to 102,064 European ancestry individuals | 19557161 | PLoS Genet                |
| BMI+weight | established | 3q21.1  | ADCY5             | rs9883204-C | -0,1 | 10,623 European descent individuals                                           | 27,591 European descent individuals         | 20372150 | Nat Genet                 |

|            |             |         |              |              |             |                                                                                                                      |                                                                                                                        |          |               |
|------------|-------------|---------|--------------|--------------|-------------|----------------------------------------------------------------------------------------------------------------------|------------------------------------------------------------------------------------------------------------------------|----------|---------------|
| BMI+weight | established | 16q12.2 | FTO          | rs9939609-A  | 0,1         | 32,387 individuals                                                                                                   | 59,092 individuals                                                                                                     | 19079261 | Nat Genet     |
| BMI+weight | established | 16q12.2 | FTO          | rs9939609-A  | 0,1         | 10,657 adults                                                                                                        | 19,424 adults,10,172 children                                                                                          | 17434869 | Science       |
| BMI+weight | established | 16q12.2 | FTO          | rs9941349-T  | 0,1         | 775 European ancestry cases, 3,197 European ancestry controls                                                        | NR                                                                                                                     | 19553259 | Hum Mol Genet |
| BMI+weight | established | 6p21.31 | ITPR3        | rs999943-T   | 0,1         | 775 European ancestry cases, 3,197 European ancestry controls                                                        | NR                                                                                                                     | 19553259 | Hum Mol Genet |
| CAD        | established | 2q37.1  | INPP5D       | rs10933436-A | 0,058268908 | 22,233 European ancestry cases, 64,762 European ancestry controls                                                    | 28,834 cases, 27,674 controls, 2,115 individuals.                                                                      | 21378990 | Nat Genet     |
| CAD        | established | 7q22.3  | BCAP29       | rs10953541-C | 0,076961041 | 8,424 European ancestry cases, 7,268 European ancestry controls, 6,996 South Asian cases, 7,794 South Asian controls | 18,049 European ancestry cases, 16,357 European ancestry controls, 3,359 South Asian cases, 2,828 South Asian controls | 21378988 | Nat Genet     |
| CAD        | established | 1p32.3  | BSND - PCSK9 | rs11206510-T | 0,076961041 | 22,233 European ancestry cases, 64,762 European ancestry controls                                                    | 28,834 cases, 27,674 controls, 2,115 individuals.                                                                      | 21378990 | Nat Genet     |
| CAD        | established | 19p13.2 | SMARCA4      | rs1122608-G  | 0,131028262 | 22,233 European ancestry cases, 64,762 European ancestry controls                                                    | 28,834 cases, 27,674 controls, 2,115 individuals.                                                                      | 21378990 | Nat Genet     |
| CAD        | established | 7q32.2  | ZC3HC1       | rs11556924-C | 0,08618     | 22,233 European ancestry cases, 64,762 European ancestry controls                                                    | 28,834 cases, 27,674 controls, 2,115 individuals.                                                                      | 21378990 | Nat Genet     |
| CAD        | established | 6q23.2  | TCF21        | rs12190287-C | 0,07696     | 22,233 European ancestry cases, 64,762 European ancestry controls                                                    | 28,834 cases, 27,674 controls, 2,115 individuals.                                                                      | 21378990 | Nat Genet     |
| CAD        | established | 17p13.3 | SMG6         | rs1231206-A  | 0,067658648 | 22,233 European ancestry cases, 64,762                                                                               | 28,834 cases, 27,674 controls, 2,115 individuals.                                                                      | 21378990 | Nat Genet     |

|     |             |          |                  |              |             |                                                                                                                      |                                                                                                                        |          |                       |
|-----|-------------|----------|------------------|--------------|-------------|----------------------------------------------------------------------------------------------------------------------|------------------------------------------------------------------------------------------------------------------------|----------|-----------------------|
|     |             |          |                  |              |             | European ancestry controls                                                                                           |                                                                                                                        |          |                       |
| CAD | established | 10q24.32 | CNNM2            | rs12413409-G | 0,113328    | 8,424 European ancestry cases, 7,268 European ancestry controls, 6,996 South Asian cases, 7,794 South Asian controls | 18,049 European ancestry cases, 16,357 European ancestry controls, 3,359 South Asian cases, 2,828 South Asian controls | 21378988 | Nat Genet             |
| CAD | established | 10q24.32 | CNNM2            | rs12413409-G | 0,113328    | 22,233 European ancestry cases, 64,762 European ancestry controls                                                    | 28,834 cases, 27,674 controls, 2,115 individuals.                                                                      | 21378990 | Nat Genet             |
| CAD | established | 6p24.1   | PHACTR1          | rs12526453-C | 0,095310179 | 22,233 European ancestry cases, 64,762 European ancestry controls                                                    | 28,834 cases, 27,674 controls, 2,115 individuals.                                                                      | 21378990 | Nat Genet             |
| CAD | established | 17p11.2  | PEMT - RAI1      | rs12936587-G | 0,0676586   | 22,233 European ancestry cases, 64,762 European ancestry controls                                                    | 28,834 cases, 27,674 controls, 2,115 individuals.                                                                      | 21378990 | Nat Genet             |
| CAD | established | 6p24.1   | PHACTR1          | rs1332844-T  | 0,204360015 | 8,424 European ancestry cases, 7,268 European ancestry controls, 6,996 South Asian cases, 7,794 South Asian controls | 18,049 European ancestry cases, 16,357 European ancestry controls, 3,359 South Asian cases, 2,828 South Asian controls | 21378988 | Nat Genet             |
| CAD | established | 9p21.3   | UBA52P6 - DMRTA1 | rs1333049-C  | 0,3852624   | 2,078 European descent cases, 2,953 European descent controls                                                        | 19,350 European descent cases, 35,408 European descent controls                                                        | 21606135 | Circ Cardiovasc Genet |
| CAD | established | 9p21.3   | UBA52P6 - DMRTA1 | rs1333049-C  | 0,3852624   | 1,926 cases, 2,938 controls                                                                                          | 875 cases, 1,644 controls                                                                                              | 17634449 | N Engl J Med          |
| CAD | established | 9p21.3   | UBA52P6 - DMRTA1 | rs1333049-C  | 0,3852624   | 1,926 cases, 2,938 controls                                                                                          | (see Samani 2007)                                                                                                      | 17554300 | Nature                |
| CAD | established | 10q23.31 | LIPA             | rs1412444-T  | 0,095310179 | 2,078 European descent cases, 2,953 European descent controls                                                        | 19,350 European descent cases, 35,408 European descent controls                                                        | 21606135 | Circ Cardiovasc Genet |
| CAD | established | 10q23.31 | LIPA             | rs1412444-T  | 0,095310179 | 8,424 European ancestry cases, 7,268                                                                                 | 18,049 European ancestry cases, 16,357 European                                                                        | 21378988 | Nat Genet             |

|     |             |          |                    |              |             |                                                                                 |                                                                        |          |                      |
|-----|-------------|----------|--------------------|--------------|-------------|---------------------------------------------------------------------------------|------------------------------------------------------------------------|----------|----------------------|
|     |             |          |                    |              |             | European ancestry controls, 6,996 South Asian cases, 7,794 South Asian controls | ancestry controls, 3,359 South Asian cases, 2,828 South Asian controls |          |                      |
| CAD | established | 6q14.1   | FAM46A - IBTK      | rs16893526-G | 0,122217632 | 2,078 European descent cases, 2,953 European descent controls                   | 19,350 European descent cases, 35,408 European descent controls        | 21606135 | Circ Cardioasc Genet |
| CAD | established | 1p32.2   | PPAP2B             | rs17114036-A | 0,157       | 22,233 European ancestry cases, 64,762 European ancestry controls               | 28,834 cases, 27,674 controls, 2,115 individuals.                      | 21378990 | Nat Genet            |
| CAD | established | 15q22.33 | SMAD3              | rs17228212-C | 0,190620359 | 1,926 cases, 2,938 controls                                                     | 875 cases, 1,644 controls                                              | 17634449 | N Engl J Med         |
| CAD | established | 10q11.21 | HNRNPA3P1 - CXCL12 | rs1746048-C  | 0,086177696 | 22,233 European ancestry cases, 64,762 European ancestry controls               | 28,834 cases, 27,674 controls, 2,115 individuals.                      | 21378990 | Nat Genet            |
| CAD | established | 1q41     | MIA3               | rs17465637-C | 0,182321556 | 22,233 European ancestry cases, 64,762 European ancestry controls               | 28,834 cases, 27,674 controls, 2,115 individuals.                      | 21378990 | Nat Genet            |
| CAD | established | 1q41     | MIA3               | rs17465637-C | 0,182321556 | 1,926 cases, 2,938 controls                                                     | 875 cases, 1,644 controls                                              | 17634449 | N Engl J Med         |
| CAD | established | 6p21.31  | ANKS1A             | rs17609940-G | 0,06765     | 22,233 European ancestry cases, 64,762 European ancestry controls               | 28,834 cases, 27,674 controls, 2,115 individuals.                      | 21378990 | Nat Genet            |
| CAD | established | 1q43     | FMN2               | rs17672135-T | 0,357674444 | 1,926 cases, 2,938 controls                                                     | (see Samani 2007)                                                      | 17554300 | Nature               |
| CAD | established | 17p13.3  | SMG6               | rs216172-C   | 0,0676586   | 22,233 European ancestry cases, 64,762 European ancestry controls               | 28,834 cases, 27,674 controls, 2,115 individuals.                      | 21378990 | Nat Genet            |
| CAD | established | 12q24.31 | HNF1A              | rs2259816-T  | 0,076961041 | 6,990 cases, 8,955 controls                                                     | 12,417 cases, 12,411 controls                                          | 19198612 | Nat Genet            |
| CAD | established | 3q22.3   | MRAS               | rs2306374-C  | 0,113328685 | 22,233 European ancestry cases, 64,762 European ancestry                        | 28,834 cases, 27,674 controls, 2,115 individuals.                      | 21378990 | Nat Genet            |

|     |             |          |                     |             |             |                                                                                                                      |                                                                                                                        |          |                       |
|-----|-------------|----------|---------------------|-------------|-------------|----------------------------------------------------------------------------------------------------------------------|------------------------------------------------------------------------------------------------------------------------|----------|-----------------------|
|     |             |          |                     |             |             | controls                                                                                                             |                                                                                                                        |          |                       |
| CAD | established | 10p11.23 | KIAA1462            | rs2505083-C | 0,067658648 | 8,424 European ancestry cases, 7,268 European ancestry controls, 6,996 South Asian cases, 7,794 South Asian controls | 18,049 European ancestry cases, 16,357 European ancestry controls, 3,359 South Asian cases, 2,828 South Asian controls | 21378988 | Nat Genet             |
| CAD | established | 14q32.2  | HHIPL1              | rs2895811-C | 0,0676586   | 22,233 European ancestry cases, 64,762 European ancestry controls                                                    | 28,834 cases, 27,674 controls, 2,115 individuals.                                                                      | 21378990 | Nat Genet             |
| CAD | established | 2q36.3   | NYAP2 - IRS1        | rs2943634-C | 0,190620359 | 1,926 cases, 2,938 controls                                                                                          | 875 cases, 1,644 controls                                                                                              | 17634449 | N Engl J Med          |
| CAD | established | 12q24.12 | SH2B3               | rs3184504-T | 0,067658648 | 22,233 European ancestry cases, 64,762 European ancestry controls                                                    | 28,834 cases, 27,674 controls, 2,115 individuals.                                                                      | 21378990 | Nat Genet             |
| CAD | established | 6q25.3   | FNDC1               | rs365302-C  | 0,104360015 | 2,078 European descent cases, 2,953 European descent controls                                                        | 19,350 European descent cases, 35,408 European descent controls                                                        | 21606135 | Circ Cardiovasc Genet |
| CAD | established | 10p11.23 | KIAA1462            | rs3739998-C | 0,139761942 | 1,157 European cases, 1,748 European controls                                                                        | 7,887 European cases, 8,244 European controls                                                                          | 21088011 | Eur Heart J           |
| CAD | established | 6q25.3   | LPA                 | rs3798220-C | 0,41210965  | 22,233 European ancestry cases, 64,762 European ancestry controls                                                    | 28,834 cases, 27,674 controls, 2,115 individuals.                                                                      | 21378990 | Nat Genet             |
| CAD | established | 15q25.1  | ADAMTS7             | rs3825807-A | 0,076961041 | 22,233 European ancestry cases, 64,762 European ancestry controls                                                    | 28,834 cases, 27,674 controls, 2,115 individuals.                                                                      | 21378990 | Nat Genet             |
| CAD | established | 15q25.1  | ADAMTS7 - RPL21P116 | rs4380028-C | 0,067658648 | 8,424 European ancestry cases, 7,268 European ancestry controls, 6,996 South Asian cases, 7,794 South Asian controls | 18,049 European ancestry cases, 16,357 European ancestry controls, 3,359 South Asian cases, 2,828 South Asian controls | 21378988 | Nat Genet             |
| CAD | established | 17q21.32 | UBE2Z               | rs46522-T   | 0,058268    | 22,233 European ancestry cases, 64,762                                                                               | 28,834 cases, 27,674 controls, 2,115 individuals.                                                                      | 21378990 | Nat Genet             |



|     |             |          |                    |             |             |                                                                                                                      |                                                                                                                        |          |              |
|-----|-------------|----------|--------------------|-------------|-------------|----------------------------------------------------------------------------------------------------------------------|------------------------------------------------------------------------------------------------------------------------|----------|--------------|
|     |             |          |                    |             |             | European ancestry controls                                                                                           |                                                                                                                        |          |              |
| CAD | established | 13q34    | COL4A1;COL4A2      | rs4773144-G | 0,0676586   | 22,233 European ancestry cases, 64,762 European ancestry controls                                                    | 28,834 cases, 27,674 controls, 2,115 individuals.                                                                      | 21378990 | Nat Genet    |
| CAD | established | 11q24.2  | ST3GAL4            | rs4937126-G | 0,058268908 | 22,233 European ancestry cases, 64,762 European ancestry controls                                                    | 28,834 cases, 27,674 controls, 2,115 individuals.                                                                      | 21378990 | Nat Genet    |
| CAD | established | 9p21.3   | CDKN2B-AS1         | rs4977574-G | 0,254642218 | 22,233 European ancestry cases, 64,762 European ancestry controls                                                    | 28,834 cases, 27,674 controls, 2,115 individuals.                                                                      | 21378990 | Nat Genet    |
| CAD | established | 9p21.3   | CDKN2B-AS1         | rs4977574-G | 0,254642218 | 8,424 European ancestry cases, 7,268 European ancestry controls, 6,996 South Asian cases, 7,794 South Asian controls | 18,049 European ancestry cases, 16,357 European ancestry controls, 3,359 South Asian cases, 2,828 South Asian controls | 21378988 | Nat Genet    |
| CAD | established | 10q11.21 | HNRNPA3P1 - CXCL12 | rs501120-T  | 0,285178942 | 1,926 cases, 2,938 controls                                                                                          | 875 cases, 1,644 controls                                                                                              | 17634449 | N Engl J Med |
| CAD | established | 9q34.2   | ABO - LCN1P2       | rs579459-C  | 0,09531     | 22,233 European ancestry cases, 64,762 European ancestry controls                                                    | 28,834 cases, 27,674 controls, 2,115 individuals.                                                                      | 21378990 | Nat Genet    |
| CAD | established | 1p13.3   | PSRC1              | rs599839-A  | 0,254642218 | 22,233 European ancestry cases, 64,762 European ancestry controls                                                    | 28,834 cases, 27,674 controls, 2,115 individuals.                                                                      | 21378990 | Nat Genet    |
| CAD | established | 1p13.3   | PSRC1              | rs599839-A  | 0,254642218 | 1,926 cases, 2,938 controls                                                                                          | 875 cases, 1,644 controls                                                                                              | 17634449 | N Engl J Med |
| CAD | established | 1p13.3   | CELSR2             | rs646776-T  | 0,131028262 | 8,424 European ancestry cases, 7,268 European ancestry controls, 6,996 South Asian cases, 7,794 South Asian controls | 18,049 European ancestry cases, 16,357 European ancestry controls, 3,359 South Asian cases, 2,828 South Asian controls | 21378988 | Nat Genet    |

|     |             |          |                   |             |             |                                                                                                                      |                                                                                                                        |          |                       |
|-----|-------------|----------|-------------------|-------------|-------------|----------------------------------------------------------------------------------------------------------------------|------------------------------------------------------------------------------------------------------------------------|----------|-----------------------|
| CAD | established | 2q33.2   | WDR12             | rs6725887-C | 0,131028262 | 22,233 European ancestry cases, 64,762 European ancestry controls                                                    | 28,834 cases, 27,674 controls, 2,115 individuals.                                                                      | 21378990 | Nat Genet             |
| CAD | established | 22q12.1  | SEZ6L             | rs688034-T  | 0,104360015 | 1,926 cases, 2,938 controls                                                                                          | (see Samani 2007)                                                                                                      | 17554300 | Nature                |
| CAD | established | 6q25.1   | MTHFD1L           | rs6922269-A | 0,207014169 | 1,926 cases, 2,938 controls                                                                                          | 875 cases, 1,644 controls                                                                                              | 17634449 | N Engl J Med          |
| CAD | established | 3p25.1   | BTD               | rs7651039-C | 0,058268908 | 22,233 European ancestry cases, 64,762 European ancestry controls                                                    | 28,834 cases, 27,674 controls, 2,115 individuals.                                                                      | 21378990 | Nat Genet             |
| CAD | established | 7q31.2   | ASZ1              | rs7808424-G | 0,095310179 | 22,233 European ancestry cases, 64,762 European ancestry controls                                                    | 28,834 cases, 27,674 controls, 2,115 individuals.                                                                      | 21378990 | Nat Genet             |
| CAD | established | 9p21.3   | CDKN2B-AS1        | rs7865618-A | 0,165514438 | 2,078 European descent cases, 2,953 European descent controls                                                        | 19,350 European descent cases, 35,408 European descent controls                                                        | 21606135 | Circ Cardiovasc Genet |
| CAD | established | 16q23.3  | CDH13             | rs8055236-G | 0,647103242 | 1,926 cases, 2,938 controls                                                                                          | (see Samani 2007)                                                                                                      | 17554300 | Nature                |
| CAD | established | 11q23.3  | ZNF259            | rs964184-G  | 0,1222176   | 22,233 European ancestry cases, 64,762 European ancestry controls                                                    | 28,834 cases, 27,674 controls, 2,115 individuals.                                                                      | 21378990 | Nat Genet             |
| CAD | established | 11q22.3  | DYNC2H1 - PDGFD   | rs974819-T  | 0,067658648 | 8,424 European ancestry cases, 7,268 European ancestry controls, 6,996 South Asian cases, 7,794 South Asian controls | 18,049 European ancestry cases, 16,357 European ancestry controls, 3,359 South Asian cases, 2,828 South Asian controls | 21378988 | Nat Genet             |
| CAD | established | 3q22.3   | MRAS              | rs9818870-T | 0,139761942 | 6,990 cases, 8,955 controls                                                                                          | 12,417 cases, 12,411 controls                                                                                          | 19198612 | Nat Genet             |
| CAD | established | 21q22.11 | LINC00310 - KCNE2 | rs9982601-T | 0,165514438 | 22,233 European ancestry cases, 64,762 European ancestry controls                                                    | 28,834 cases, 27,674 controls, 2,115 individuals.                                                                      | 21378990 | Nat Genet             |
| DBP | established | 12p24.21 | TBX3 - UBA52P7    | rs10850411- | 0,2527      | 69,395 European                                                                                                      | Up to 133,361 European                                                                                                 | 19430479 | Nature                |

|     |             |          |                    |              |         |                                      |                                                                        |          |           |
|-----|-------------|----------|--------------------|--------------|---------|--------------------------------------|------------------------------------------------------------------------|----------|-----------|
|     |             |          |                    | T            |         | ancestry individuals                 | ancestry individuals                                                   |          |           |
| DBP | established | 10p12.31 | CACNB2             | rs11014166-A | 0,1     | 29,136 individuals                   | 34,433 individuals                                                     | 19430479 | Nat Genet |
| DBP | established | 10p12.31 | CACNB2             | rs11014166-A | 0,1     | 29,136 individuals                   | 34,433 individuals                                                     | 19430479 | Nat Genet |
| DBP | established | 10p12.31 | CACNB2             | rs11014166-A | 0,1     | 29,136 individuals                   | 34,433 individuals                                                     | 19430479 | Nat Genet |
| DBP | established | 11p15.1  | PLEKHA7            | rs11024074-T | -0,1    | 29,136 individuals                   | 34,433 individuals                                                     | 19430479 | Nat Genet |
| DBP | established | 10q24.32 | NT5C2              | rs11191548-T | 0,4638  | 74,064 European ancestry individuals | 48,607 European ancestry individuals                                   | 21909110 | Nat Genet |
| DBP | established | 10q24.32 | NT5C2              | rs11191548-T | 0,4638  | 69,395 European ancestry individuals | Up to 133,361 European ancestry individuals                            | 21909115 | Nature    |
| DBP | established | 10q24.32 | NT5C2              | rs11191548-T | 0,4638  | 34,433 individuals                   | Up to 100,347 white individuals, up to 12,889 Indian Asian individuals | 19430483 | Nat Genet |
| DBP | established | 5p13.3   | -                  | rs1173771-G  | 0,2608  | 74,064 European ancestry individuals | 48,607 European ancestry individuals                                   | 21909110 | Nat Genet |
| DBP | established | 5p13.3   | -                  | rs1173771-G  | 0,2608  | 74,064 European ancestry individuals | 48,607 European ancestry individuals                                   | 21909110 | Nat Genet |
| DBP | established | 5p13.3   | -                  | rs1173771-G  | 0,2608  | 69,395 European ancestry individuals | Up to 133,361 European ancestry individuals                            | 21909115 | Nature    |
| DBP | established | 5p13.3   | -                  | rs1173771-G  | 0,2608  | 69,395 European ancestry individuals | Up to 133,361 European ancestry individuals                            | 21909115 | Nature    |
| DBP | established | 5p13.3   | -                  | rs1173771-G  | 0,2608  | 69,395 European ancestry individuals | Up to 133,361 European ancestry individuals                            | 21909115 | Nature    |
| DBP | established | 5q33.3   | RPLP2P2 - EBF1     | rs11953630-T | -0,2811 | 69,395 European ancestry individuals | Up to 133,361 European ancestry individuals                            | 21909115 | Nature    |
| DBP | established | 5q33.3   | RPLP2P2 - EBF1     | rs11953630-T | -0,2811 | 69,395 European ancestry individuals | Up to 133,361 European ancestry individuals                            | 21909115 | Nature    |
| DBP | established | 5q33.3   | RPLP2P2 - EBF1     | rs11953630-T | -0,2811 | 69,395 European ancestry individuals | Up to 133,361 European ancestry individuals                            | 21909115 | Nature    |
| DBP | established | 17q21.33 | ZNF652             | rs12940887-T | 0,2705  | 74,064 European ancestry individuals | 48,607 European ancestry individuals                                   | 21909110 | Nat Genet |
| DBP | established | 3p24.1   | UBA52P4 - RPS27P11 | rs13082711-T | -0,2377 | 74,064 European ancestry individuals | 48,607 European ancestry individuals                                   | 21909110 | Nat Genet |
| DBP | established | 3p24.1   | UBA52P4 - RPS27P11 | rs13082711-T | -0,2377 | 69,395 European ancestry individuals | Up to 133,361 European ancestry individuals                            | 21909115 | Nature    |

|     |             |         |                    |              |         |                                      |                                                                        |          |           |
|-----|-------------|---------|--------------------|--------------|---------|--------------------------------------|------------------------------------------------------------------------|----------|-----------|
| DBP | established | 3p24.1  | UBA52P4 - RPS27P11 | rs13082711-T | -0,2377 | 69,395 European ancestry individuals | Up to 133,361 European ancestry individuals                            | 21909115 | Nature    |
| DBP | established | 4q24    | SLC39A8            | rs13107325-T | -0,6842 | 74,064 European ancestry individuals | 48,607 European ancestry individuals                                   | 21909110 | Nat Genet |
| DBP | established | 4q24    | SLC39A8            | rs13107325-T | -0,6842 | 69,395 European ancestry individuals | Up to 133,361 European ancestry individuals                            | 21909115 | Nature    |
| DBP | established | 4q24    | SLC39A8            | rs13107325-T | -0,6842 | 69,395 European ancestry individuals | Up to 133,361 European ancestry individuals                            | 21909115 | Nature    |
| DBP | established | 4q24    | SLC39A8            | rs13107325-T | -0,6842 | 69,395 European ancestry individuals | Up to 133,361 European ancestry individuals                            | 21909115 | Nature    |
| DBP | established | 4q32.1  | GUCY1A3            | rs13139571-C | 0,2601  | 74,064 European ancestry individuals | 48,607 European ancestry individuals                                   | 21909110 | Nat Genet |
| DBP | established | 4q32.1  | GUCY1A3            | rs13139571-C | 0,2601  | 69,395 European ancestry individuals | Up to 133,361 European ancestry individuals                            | 21909115 | Nature    |
| DBP | established | 4q32.1  | GUCY1A3            | rs13139571-C | 0,2601  | 69,395 European ancestry individuals | Up to 133,361 European ancestry individuals                            | 21909115 | Nature    |
| DBP | established | 20p12.2 | FAT1P1 - RPS11P1   | rs1327235-G  | 0,3016  | 74,064 European ancestry individuals | 48,607 European ancestry individuals                                   | 21909110 | Nat Genet |
| DBP | established | 20p12.2 | FAT1P1 - RPS11P1   | rs1327235-G  | 0,3016  | 69,395 European ancestry individuals | Up to 133,361 European ancestry individuals                            | 21909115 | Nature    |
| DBP | established | 20p12.2 | FAT1P1 - RPS11P1   | rs1327235-G  | 0,3016  | 69,395 European ancestry individuals | Up to 133,361 European ancestry individuals                            | 21909115 | Nature    |
| DBP | established | 15q24.1 | CSK                | rs1378942-C  | 0,1     | 74,064 European ancestry individuals | 48,607 European ancestry individuals                                   | 21909110 | Nat Genet |
| DBP | established | 15q24.1 | CSK                | rs1378942-C  | 0,1     | 69,395 European ancestry individuals | Up to 133,361 European ancestry individuals                            | 21909115 | Nature    |
| DBP | established | 15q24.1 | CSK                | rs1378942-C  | 0,1     | 34,433 individuals                   | Up to 100,347 white individuals, up to 12,889 Indian Asian individuals | 19430483 | Nat Genet |
| DBP | established | 15q24.1 | CSK                | rs1378942-C  | 0,1     | 69,395 European ancestry individuals | Up to 133,361 European ancestry individuals                            | 21909115 | Nature    |
| DBP | established | 4q21.21 | PRDM8 - FGF5       | rs1458038-T  | 0,4567  | 74,064 European ancestry individuals | 48,607 European ancestry individuals                                   | 21909110 | Nat Genet |
| DBP | established | 4q21.21 | PRDM8 - FGF5       | rs1458038-T  | 0,4567  | 69,395 European ancestry individuals | Up to 133,361 European ancestry individuals                            | 21909115 | Nature    |
| DBP | established | 4q21.21 | PRDM8 - FGF5       | rs1458038-T  | 0,4567  | 69,395 European ancestry individuals | Up to 133,361 European ancestry individuals                            | 21909115 | Nature    |
| DBP | established | 10q21.2 | C10orf107          | rs1530440-   | -0,1    | 34,433 individuals                   | Up to 100,347 white                                                    | 19430483 | Nat Genet |

|     |             |          |                     |              |         |                                         |                                                                              |          |           |
|-----|-------------|----------|---------------------|--------------|---------|-----------------------------------------|------------------------------------------------------------------------------|----------|-----------|
|     |             |          |                     | T            |         |                                         | individuals, up to 12,889<br>Indian Asian individuals                        |          |           |
| DBP | established | 17q21.33 | ZNF652              | rs16948048-G | 0,1     | 34,433 individuals                      | Up to 100,347 white<br>individuals, up to 12,889<br>Indian Asian individuals | 19430483 | Nat Genet |
| DBP | established | 4q21.21  | PRDM8 - FGF5        | rs16998073-T | 0,1     | 34,433 individuals                      | Up to 100,347 white<br>individuals, up to 12,889<br>Indian Asian individuals | 19430483 | Nat Genet |
| DBP | established | 12q21.33 | ATP2B1 -<br>MRPL2P1 | rs17249754-G | 0,5217  | 74,064 European<br>ancestry individuals | 48,607 European ancestry<br>individuals                                      | 21909110 | Nat Genet |
| DBP | established | 12q21.33 | ATP2B1 -<br>MRPL2P1 | rs17249754-G | 0,5217  | 74,064 European<br>ancestry individuals | 48,607 European ancestry<br>individuals                                      | 21909110 | Nat Genet |
| DBP | established | 1p36.22  | MTHFR               | rs17367504-G | -0,5466 | 74,064 European<br>ancestry individuals | 48,607 European ancestry<br>individuals                                      | 21909110 | Nat Genet |
| DBP | established | 1p36.22  | MTHFR               | rs17367504-G | -0,5466 | 34,433 individuals                      | Up to 100,347 white<br>individuals, up to 12,889<br>Indian Asian individuals | 19430483 | Nat Genet |
| DBP | established | 6p22.2   | HFE                 | rs1799945-G  | 0,4573  | 69,395 European<br>ancestry individuals | Up to 133,361 European<br>ancestry individuals                               | 21909115 | Nature    |
| DBP | established | 6p22.2   | HFE                 | rs1799945-G  | 0,4573  | 69,395 European<br>ancestry individuals | Up to 133,361 European<br>ancestry individuals                               | 21909115 | Nature    |
| DBP | established | 6p22.2   | HFE                 | rs1799945-G  | 0,4573  | 69,395 European<br>ancestry individuals | Up to 133,361 European<br>ancestry individuals                               | 21909115 | Nature    |
| DBP | established | 10p12.31 | CACNB2              | rs1813353-T  | 0,4148  | 29,136 individuals                      | 34,433 individuals                                                           | 19430479 | Nat Genet |
| DBP | established | 3q26.2   | MECOM               | rs1918974-T  | -0,1    | 34,433 individuals                      | Up to 100,347 white<br>individuals, up to 12,889<br>Indian Asian individuals | 19430483 | Nat Genet |
| DBP | established | 12q24.21 | TBX3 - UBA52P7      | rs2384550-A  | -0,1    | 29,136 individuals                      | 34,433 individuals                                                           | 19430479 | Nat Genet |
| DBP | established | 12q24.21 | TBX3 - UBA52P7      | rs2384550-A  | -0,1    | 74,064 European<br>ancestry individuals | 48,607 European ancestry<br>individuals                                      | 21909110 | Nat Genet |
| DBP | established | 15q26.1  | FES                 | rs2521501-T  | 0,3585  | 74,064 European<br>ancestry individuals | 48,607 European ancestry<br>individuals                                      | 21909110 | Nat Genet |
| DBP | established | 15q26.1  | FES                 | rs2521501-T  | 0,3585  | 69,395 European<br>ancestry individuals | Up to 133,361 European<br>ancestry individuals                               | 21909115 | Nature    |
| DBP | established | 15q26.1  | FES                 | rs2521501-T  | 0,3585  | 69,395 European<br>ancestry individuals | Up to 133,361 European<br>ancestry individuals                               | 21909115 | Nature    |

|     |             |          |                   |             |         |                                      |                                             |          |           |
|-----|-------------|----------|-------------------|-------------|---------|--------------------------------------|---------------------------------------------|----------|-----------|
| DBP | established | 15q26.1  | FES               | rs2521501-T | 0,3585  | 69,395 European ancestry individuals | Up to 133,361 European ancestry individuals | 21909115 | Nature    |
| DBP | established | 12q21.33 | ATP2B1            | rs2681472-A | 0,1     | 29,136 individuals                   | 34,433 individuals                          | 19430479 | Nat Genet |
| DBP | established | 12q21.33 | ATP2B1            | rs2681472-A | 0,1     | 29,136 individuals                   | 34,433 individuals                          | 19430479 | Nat Genet |
| DBP | established | 1p13.2   | MOV10             | rs2932538-G | 0,2397  | 74,064 European ancestry individuals | 48,607 European ancestry individuals        | 21909110 | Nat Genet |
| DBP | established | 1p13.2   | MOV10             | rs2932538-G | 0,2397  | 69,395 European ancestry individuals | Up to 133,361 European ancestry individuals | 21909115 | Nature    |
| DBP | established | 1p13.2   | MOV10             | rs2932538-G | 0,2397  | 69,395 European ancestry individuals | Up to 133,361 European ancestry individuals | 21909115 | Nature    |
| DBP | established | 1p13.2   | MOV10             | rs2932538-G | 0,2397  | 69,395 European ancestry individuals | Up to 133,361 European ancestry individuals | 21909115 | Nature    |
| DBP | established | 12q24.12 | SH2B3             | rs3184504-T | 0,1     | 69,395 European ancestry individuals | Up to 133,361 European ancestry individuals | 21909115 | Nature    |
| DBP | established | 12q24.12 | SH2B3             | rs3184504-T | 0,1     | 29,136 individuals                   | 34,433 individuals                          | 19430479 | Nat Genet |
| DBP | established | 12q24.12 | SH2B3             | rs3184504-T | 0,1     | 29,136 individuals                   | 34,433 individuals                          | 19430479 | Nat Genet |
| DBP | established | 3p22.1   | ULK4              | rs3774372-T | -0,3666 | 74,064 European ancestry individuals | 48,607 European ancestry individuals        | 21909110 | Nat Genet |
| DBP | established | 11p15.1  | PLEKHA7           | rs381815-T  | 0,3485  | 74,064 European ancestry individuals | 48,607 European ancestry individuals        | 21909110 | Nat Genet |
| DBP | established | 11p15.1  | PLEKHA7           | rs381815-T  | 0,3485  | 74,064 European ancestry individuals | 48,607 European ancestry individuals        | 21909110 | Nat Genet |
| DBP | established | 11p15.1  | PLEKHA7           | rs381815-T  | 0,3485  | 29,136 individuals                   | 34,433 individuals                          | 19430479 | Nat Genet |
| DBP | established | 3q26.2   | MECOM             | rs419076-T  | 0,2414  | 74,064 European ancestry individuals | 48,607 European ancestry individuals        | 21909110 | Nat Genet |
| DBP | established | 3q26.2   | MECOM             | rs419076-T  | 0,2414  | 69,395 European ancestry individuals | Up to 133,361 European ancestry individuals | 21909115 | Nature    |
| DBP | established | 3q26.2   | MECOM             | rs419076-T  | 0,2414  | 69,395 European ancestry individuals | Up to 133,361 European ancestry individuals | 21909115 | Nature    |
| DBP | established | 10p12.33 | SLC39A12 - CACNB2 | rs4373814-G | -0,2184 | 69,395 European ancestry individuals | Up to 133,361 European ancestry individuals | 21909115 | Nature    |
| DBP | established | 10p12.33 | SLC39A12 - CACNB2 | rs4373814-G | -0,2184 | 69,395 European ancestry individuals | Up to 133,361 European ancestry individuals | 21909115 | Nature    |

|     |             |          |                   |             |         |                                      |                                                                        |          |           |
|-----|-------------|----------|-------------------|-------------|---------|--------------------------------------|------------------------------------------------------------------------|----------|-----------|
| DBP | established | 10p12.33 | SLC39A12 - CACNB2 | rs4373814-G | -0,2184 | 69,395 European ancestry individuals | Up to 133,361 European ancestry individuals                            | 21909115 | Nature    |
| DBP | established | 10q21.2  | C10orf107         | rs4590817-G | 0,4192  | 74,064 European ancestry individuals | 48,607 European ancestry individuals                                   | 21909110 | Nat Genet |
| DBP | established | 20q13.32 | MRPS16P - ZNF831  | rs6015450-G | 0,5568  | 74,064 European ancestry individuals | 48,607 European ancestry individuals                                   | 21909110 | Nat Genet |
| DBP | established | 20q13.32 | MRPS16P - ZNF831  | rs6015450-G | 0,5568  | 74,064 European ancestry individuals | 48,607 European ancestry individuals                                   | 21909110 | Nat Genet |
| DBP | established | 20q13.32 | MRPS16P - ZNF831  | rs6015450-G | 0,5568  | 69,395 European ancestry individuals | Up to 133,361 European ancestry individuals                            | 21909115 | Nature    |
| DBP | established | 20q13.32 | MRPS16P - ZNF831  | rs6015450-G | 0,5568  | 69,395 European ancestry individuals | Up to 133,361 European ancestry individuals                            | 21909115 | Nature    |
| DBP | established | 20q13.32 | MRPS16P - ZNF831  | rs6015450-G | 0,5568  | 69,395 European ancestry individuals | Up to 133,361 European ancestry individuals                            | 21909115 | Nature    |
| DBP | established | 11q22.1  | ARHGAP42          | rs633185-G  | -0,3276 | 74,064 European ancestry individuals | 48,607 European ancestry individuals                                   | 21909110 | Nat Genet |
| DBP | established | 11q22.1  | ARHGAP42          | rs633185-G  | -0,3276 | 69,395 European ancestry individuals | Up to 133,361 European ancestry individuals                            | 21909115 | Nature    |
| DBP | established | 11q22.1  | ARHGAP42          | rs633185-G  | -0,3276 | 69,395 European ancestry individuals | Up to 133,361 European ancestry individuals                            | 21909115 | Nature    |
| DBP | established | 11q22.1  | ARHGAP42          | rs633185-G  | -0,3276 | 69,395 European ancestry individuals | Up to 133,361 European ancestry individuals                            | 21909115 | Nature    |
| DBP | established | 15q24.1  | CPLX3 - ULK3      | rs6495122-A | 0,1     | 29,136 individuals                   | 34,433 individuals                                                     | 19430479 | Nat Genet |
| DBP | established | 12q24.12 | ATXN2             | rs653178-T  | -0,1    | 74,064 European ancestry individuals | 48,607 European ancestry individuals                                   | 21909110 | Nat Genet |
| DBP | established | 12q24.12 | ATXN2             | rs653178-T  | -0,1    | 34,433 individuals                   | Up to 100,347 white individuals, up to 12,889 Indian Asian individuals | 19430483 | Nat Genet |
| DBP | established | 6p21.33  | BAG6              | rs805303-G  | 0,2282  | 69,395 European ancestry individuals | Up to 133,361 European ancestry individuals                            | 21909115 | Nature    |
| DBP | established | 6p21.33  | BAG6              | rs805303-G  | 0,2282  | 69,395 European ancestry individuals | Up to 133,361 European ancestry individuals                            | 21909115 | Nature    |
| DBP | established | 6p21.33  | BAG6              | rs805303-G  | 0,2282  | 69,395 European ancestry individuals | Up to 133,361 European ancestry individuals                            | 21909115 | Nature    |
| DBP | established | 3p22.1   | ULK4              | rs9815354-A | 0,1     | 29,136 individuals                   | 34,433 individuals                                                     | 19430479 | Nat Genet |
| HDL | established | 15q21.3  | RPL28P4 - LIPC    | rs10468017- | 0,1     | 19,840 individuals                   | Up to 20,623 individuals                                               | 19060906 | Nat Genet |

|     |             |          |                |              |      |                                                 |                                                                                       |          |                               |
|-----|-------------|----------|----------------|--------------|------|-------------------------------------------------|---------------------------------------------------------------------------------------|----------|-------------------------------|
|     |             |          |                | T            |      |                                                 |                                                                                       |          |                               |
| HDL | established | 1q42.13  | GALNT2         | rs10489615-G | 0,1  | up to 17,243 white European descent individuals | up to 37,774 white European descent individuals, up to 9,665 Indian Asian individuals | 20864672 | Arterioscler Thromb Vasc Biol |
| HDL | established | 8p21.3   | LPL - RPL30P9  | rs10503669-T | 0,1  | 8,656 individuals                               | 11,399 individuals                                                                    | 18193043 | Nat Genet                     |
| HDL | established | 11q23.3  | BUD13          | rs10790162-A | 0,1  | 22,161 European ancestry individuals            | NR                                                                                    | 21386085 | Diabetes                      |
| HDL | established | 2p24.1   | C2orf43 - APOB | rs11902417-G | -0,1 | up to 17,243 white European descent individuals | up to 37,774 white European descent individuals, up to 9,665 Indian Asian individuals | 20864672 | Arterioscler Thromb Vasc Biol |
| HDL | established | 16q22.1  | GFOD2          | rs12449157-G | 0,1  | up to 17,243 white European descent individuals | up to 37,774 white European descent individuals, up to 9,665 Indian Asian individuals | 20864672 | Arterioscler Thromb Vasc Biol |
| HDL | established | 8p21.3   | LPL - RPL30P9  | rs12678919-G | 0,1  | 99,900 European descent individuals             |                                                                                       | 20686565 | Nature                        |
| HDL | established | 8p21.3   | LPL - RPL30P9  | rs12678919-G | 0,1  | 19,840 individuals                              | Up to 20,623 individuals                                                              | 19060906 | Nat Genet                     |
| HDL | established | 8p21.3   | LPL            | rs13702-A    | 0,1  | 22,161 European ancestry individuals            | NR                                                                                    | 21386085 | Diabetes                      |
| HDL | established | 15q21.3  | RPL28P4 - LIPC | rs1532085-G  | -0,1 | Up to 100,184 European descent individuals      |                                                                                       | 20686565 | Nature                        |
| HDL | established | 15q21.3  | RPL28P4 - LIPC | rs1532085-G  | -0,1 | 99,900 European descent individuals             |                                                                                       | 20686565 | Nature                        |
| HDL | established | 15q21.3  | RPL28P4 - LIPC | rs1532085-G  | -0,1 | 4,763 individuals                               | NR                                                                                    | 19060910 | Nat Genet                     |
| HDL | established | 15q21.3  | RPL28P4 - LIPC | rs1532085-G  | -0,1 | 22,562 individuals                              | NR                                                                                    | 19060911 | Nat Genet                     |
| HDL | established | 15q21.3  | RPL28P4 - LIPC | rs1532085-G  | -0,1 | 21,412 individuals                              | NR                                                                                    | 19060911 | Nat Genet                     |
| HDL | established | 16q13    | CETP           | rs1532624-C  | -0,1 | 656 Swedish individuals                         | Up to 3,996 European individuals                                                      | 20066028 | PLoS Genet                    |
| HDL | established | 16q13    | CETP           | rs1532624-C  | -0,1 | 21,412 individuals                              | NR                                                                                    | 19060911 | Nat Genet                     |
| HDL | established | 19q13.32 | TOMM40         | rs157580-G   | 0,1  | 21,412 individuals                              | NR                                                                                    | 19060911 | Nat Genet                     |



|     |             |          |                |              |      |                                                 |                                                                                       |          |                               |
|-----|-------------|----------|----------------|--------------|------|-------------------------------------------------|---------------------------------------------------------------------------------------|----------|-------------------------------|
| HDL | established | 16q13    | HERPUD1 - CETP | rs173539-T   | 0,1  | 22,161 European ancestry individuals            | NR                                                                                    | 21386085 | Diabetes                      |
| HDL | established | 16q13    | HERPUD1 - CETP | rs173539-T   | 0,1  | 19,840 individuals                              | Up to 20,623 individuals                                                              | 19060906 | Nat Genet                     |
| HDL | established | 11q12.2  | FADS1          | rs174547-C   | -0,1 | 19,840 individuals                              | Up to 20,623 individuals                                                              | 19060906 | Nat Genet                     |
| HDL | established | 11q12.2  | FADS1          | rs174548-G   | -0,1 | up to 17,243 white European descent individuals | up to 37,774 white European descent individuals, up to 9,665 Indian Asian individuals | 20864672 | Arterioscler Thromb Vasc Biol |
| HDL | established | 11q12.2  | FADS2          | rs174570-G   | 0,1  | 22,562 individuals                              | NR                                                                                    | 19060911 | Nat Genet                     |
| HDL | established | 11q12.2  | FADS2          | rs174570-G   | 0,1  | 21,412 individuals                              | NR                                                                                    | 19060911 | Nat Genet                     |
| HDL | established | 8p21.3   | LPL - RPL30P9  | rs17482753-T | 0,1  | Up to 4,274 European ancestry individuals       | Up to 15,873 European ancestry individuals                                            | 20031538 | Circ Cardiovasc Genet         |
| HDL | established | 15q21.3  | LIPC           | rs1800588-T  | 0,1  | 2,758 individuals                               | 18,544 individuals                                                                    | 18193044 | Nat Genet                     |
| HDL | established | 16q13    | CETP           | rs1800775-C  | -0,1 | 18,425 European ancestry females                | NR                                                                                    | 20031564 | Circ Cardiovasc Genet         |
| HDL | established | 16q13    | CETP           | rs1800775-C  | -0,1 | 2,758 individuals                               | 18,544 individuals                                                                    | 18193044 | Nat Genet                     |
| HDL | established | 20q13.12 | HNF4A          | rs1800961-T  | -0,1 | Up to 100,184 European descent individuals      |                                                                                       | 20686565 | Nature                        |
| HDL | established | 20q13.12 | HNF4A          | rs1800961-T  | -0,1 | 99,900 European descent individuals             |                                                                                       | 20686565 | Nature                        |
| HDL | established | 20q13.12 | HNF4A          | rs1800961-T  | -0,1 | 19,840 individuals                              | Up to 20,623 individuals                                                              | 19060906 | Nat Genet                     |
| HDL | established | 16q13    | CETP           | rs1864163-G  | 0,1  | 8,656 individuals                               | 11,399 individuals                                                                    | 18193043 | Nat Genet                     |
| HDL | established | 9q31.1   | ABCA1          | rs1883025-T  | -0,1 | Up to 100,184 European descent individuals      |                                                                                       | 20686565 | Nature                        |
| HDL | established | 9q31.1   | ABCA1          | rs1883025-T  | -0,1 | 99,900 European descent individuals             |                                                                                       | 20686565 | Nature                        |
| HDL | established | 9q31.1   | ABCA1          | rs1883025-T  | -0,1 | 19,840 individuals                              | Up to 20,623 individuals                                                              | 19060906 | Nat Genet                     |
| HDL | established | 11q23.3  | ZNF259         | rs2075290-C  | 0,1  | 22,161 European ancestry individuals            | NR                                                                                    | 21386085 | Diabetes                      |
| HDL | established | 8p21.3   | LPL - RPL30P9  | rs2083637-G  | 0,1  | 21,412 individuals                              | NR                                                                                    | 19060911 | Nat Genet                     |

|     |             |          |                |             |      |                                                 |                                                                                       |          |                               |
|-----|-------------|----------|----------------|-------------|------|-------------------------------------------------|---------------------------------------------------------------------------------------|----------|-------------------------------|
| HDL | established | 1q42.13  | GALNT2         | rs2144300-T | 0,1  | 8,656 individuals                               | 11,399 individuals                                                                    | 18193043 | Nat Genet                     |
| HDL | established | 18q21.1  | LIPG - ACAA2   | rs2156552-T | 0,1  | 2,758 individuals                               | 18,544 individuals                                                                    | 18193044 | Nat Genet                     |
| HDL | established | 18q21.1  | LIPG - ACAA2   | rs2156552-T | 0,1  | up to 17,243 white European descent individuals | up to 37,774 white European descent individuals, up to 9,665 Indian Asian individuals | 20864672 | Arterioscler Thromb Vasc Biol |
| HDL | established | 18q21.1  | LIPG - ACAA2   | rs2156552-T | 0,1  | 8,656 individuals                               | 11,399 individuals                                                                    | 18193043 | Nat Genet                     |
| HDL | established | 11q23.3  | ZNF259;APOA5   | rs2266788-C | 0,1  | 22,161 European ancestry individuals            | NR                                                                                    | 21386085 | Diabetes                      |
| HDL | established | 16q22.1  | NUTF2          | rs2271293-G | -0,1 | 19,840 individuals                              | Up to 20,623 individuals                                                              | 19060906 | Nat Genet                     |
| HDL | established | 16q22.1  | NUTF2          | rs2271293-G | -0,1 | 21,412 individuals                              | NR                                                                                    | 19060911 | Nat Genet                     |
| HDL | established | 12q24.11 | KCTD10         | rs2338104-G | 0,1  | 19,840 individuals                              | Up to 20,623 individuals                                                              | 19060906 | Nat Genet                     |
| HDL | established | 12q24.11 | KCTD10         | rs2338104-G | 0,1  | 8,656 individuals                               | 11,399 individuals                                                                    | 18193043 | Nat Genet                     |
| HDL | established | 16q22.1  | DPEP3          | rs255049-G  | 0,1  | 4,763 individuals                               | NR                                                                                    | 19060910 | Nat Genet                     |
| HDL | established | 16q22.1  | DPEP2          | rs255052-A  | -0,1 | 8,656 individuals                               | 11,399 individuals                                                                    | 18193043 | Nat Genet                     |
| HDL | established | 15q21.3  | LIPC           | rs261334-G  | 0,1  | up to 17,243 white European descent individuals | up to 37,774 white European descent individuals, up to 9,665 Indian Asian individuals | 20864672 | Arterioscler Thromb Vasc Biol |
| HDL | established | 8q24.13  | TRIB1 - FAM84B | rs2954026-G | -0,1 | 22,161 European ancestry individuals            | NR                                                                                    | 21386085 | Diabetes                      |
| HDL | established | 19p13.2  | RAB11B         | rs2967605-T | -0,1 | 19,840 individuals                              | Up to 20,623 individuals                                                              | 19060906 | Nat Genet                     |
| HDL | established | 8p21.3   | LPL            | rs325-T     | 0,1  | up to 17,243 white European descent individuals | up to 37,774 white European descent individuals, up to 9,665 Indian Asian individuals | 20864672 | Arterioscler Thromb Vasc Biol |
| HDL | established | 8p21.3   | LPL            | rs328-G     | 0,1  | 2,758 individuals                               | 18,544 individuals                                                                    | 18193044 | Nat Genet                     |
| HDL | established | 16q13    | HERPUD1 - CETP | rs3764261-A | 0,1  | Up to 100,184 European descent individuals      |                                                                                       | 20686565 | Nature                        |

|     |             |          |                |             |      |                                                 |                                                                                       |          |                               |
|-----|-------------|----------|----------------|-------------|------|-------------------------------------------------|---------------------------------------------------------------------------------------|----------|-------------------------------|
| HDL | established | 16q13    | HERPUD1 - CETP | rs3764261-A | 0,1  | 99,900 European descent individuals             |                                                                                       | 20686565 | Nature                        |
| HDL | established | 16q13    | HERPUD1 - CETP | rs3764261-A | 0,1  | 4,763 individuals                               | NR                                                                                    | 19060910 | Nat Genet                     |
| HDL | established | 16q13    | HERPUD1 - CETP | rs3764261-A | 0,1  | 8,656 individuals                               | 11,399 individuals                                                                    | 18193043 | Nat Genet                     |
| HDL | established | 9q31.1   | ABCA1          | rs3890182-G | 0,1  | 2,758 individuals                               | 18,544 individuals                                                                    | 18193044 | Nat Genet                     |
| HDL | established | 9q31.1   | ABCA1          | rs3890182-G | 0,1  | up to 17,243 white European descent individuals | up to 37,774 white European descent individuals, up to 9,665 Indian Asian individuals | 20864672 | Arterioscler Thromb Vasc Biol |
| HDL | established | 9q31.1   | ABCA1          | rs3905000-G | 0,1  | 21,412 individuals                              | NR                                                                                    | 19060911 | Nat Genet                     |
| HDL | established | 9q31.1   | ABCA1          | rs4149268-C | 0,1  | 8,656 individuals                               | 11,399 individuals                                                                    | 18193043 | Nat Genet                     |
| HDL | established | 19q13.32 | APOE - APOC1   | rs439401-C  | 0,1  | 22,161 European ancestry individuals            | NR                                                                                    | 21386085 | Diabetes                      |
| HDL | established | 9p22.3   | TTC39B         | rs471364-C  | -0,1 | 19,840 individuals                              | Up to 20,623 individuals                                                              | 19060906 | Nat Genet                     |
| HDL | established | 15q21.3  | RPL28P4 - LIPC | rs4775041-C | 0,1  | 8,656 individuals                               | 11,399 individuals                                                                    | 18193043 | Nat Genet                     |
| HDL | established | 1q42.13  | GALNT2         | rs4846914-G | -0,1 | 99,900 European descent individuals             |                                                                                       | 20686565 | Nature                        |
| HDL | established | 1q42.13  | GALNT2         | rs4846914-G | -0,1 | 19,840 individuals                              | Up to 20,623 individuals                                                              | 19060906 | Nat Genet                     |
| HDL | established | 1q42.13  | GALNT2         | rs4846914-G | -0,1 | 2,758 individuals                               | 18,544 individuals                                                                    | 18193044 | Nat Genet                     |
| HDL | established | 18q21.1  | LIPG - ACAA2   | rs4939883-T | -0,1 | 22,562 individuals                              | NR                                                                                    | 19060911 | Nat Genet                     |
| HDL | established | 18q21.1  | LIPG - ACAA2   | rs4939883-T | -0,1 | 21,412 individuals                              | NR                                                                                    | 19060911 | Nat Genet                     |
| HDL | established | 18q21.1  | LIPG - ACAA2   | rs4939883-T | -0,1 | 19,840 individuals                              | Up to 20,623 individuals                                                              | 19060906 | Nat Genet                     |
| HDL | established | 9p22.3   | TTC39B         | rs643531-C  | -0,1 | up to 17,243 white European descent individuals | up to 37,774 white European descent individuals, up to 9,665 Indian Asian individuals | 20864672 | Arterioscler Thromb Vasc Biol |
| HDL | established | 2p24.1   | C2orf43 - APOB | rs6754295-  | 0,1  | 21,412 individuals                              | NR                                                                                    | 19060911 | Nat Genet                     |

|     |             |          |                    |             |      |                                                 |                                                                                       |          |                               |
|-----|-------------|----------|--------------------|-------------|------|-------------------------------------------------|---------------------------------------------------------------------------------------|----------|-------------------------------|
|     |             |          |                    | C           |      |                                                 |                                                                                       |          |                               |
| HDL | established | 11p11.2  | NR1H3              | rs7120118-G | 0,1  | 4,763 individuals                               | NR                                                                                    | 19060910 | Nat Genet                     |
| HDL | established | 18q21.1  | LIPG - ACAA2       | rs7240405-A | -0,1 | Up to 4,274 European ancestry individuals       | Up to 15,873 European ancestry individuals                                            | 20031538 | Circ Cardiovasc Genet         |
| HDL | established | 11p11.2  | OR4A46P            | rs7395662-G | -0,1 | 21,412 individuals                              | NR                                                                                    | 19060911 | Nat Genet                     |
| HDL | established | 20q13.12 | PCIF1              | rs7679-C    | -0,1 | 19,840 individuals                              | Up to 20,623 individuals                                                              | 19060906 | Nat Genet                     |
| HDL | established | 11q23.3  | ZNF259             | rs964184-G  | -0,1 | Up to 100,184 European descent individuals      |                                                                                       | 20686565 | Nature                        |
| HDL | established | 11q23.3  | ZNF259             | rs964184-G  | -0,1 | up to 17,243 white European descent individuals | up to 37,774 white European descent individuals, up to 9,665 Indian Asian individuals | 20864672 | Arterioscler Thromb Vasc Biol |
| HDL | established | 11q23.3  | ZNF259             | rs964184-G  | -0,1 | 99,900 European descent individuals             |                                                                                       | 20686565 | Nature                        |
| HDL | established | 11q23.3  | ZNF259             | rs964184-G  | -0,1 | 19,840 individuals                              | Up to 20,623 individuals                                                              | 19060906 | Nat Genet                     |
| HDL | established | 17p13.3  | METTL16 - EIF4A1P9 | rs9891572-A | 0,1  | 4,763 individuals                               | NR                                                                                    | 19060910 | Nat Genet                     |
| HDL | established | 12q24.11 | MYO1H              | rs9943753-G | 0,1  | up to 17,243 white European descent individuals | up to 37,774 white European descent individuals, up to 9,665 Indian Asian individuals | 20864672 | Arterioscler Thromb Vasc Biol |
| HDL | established | 8p23.1   | PPP1R3B - TNKS     | rs9987289-A | 0,1  | 99,900 European descent individuals             |                                                                                       | 20686565 | Nature                        |
| HDL | established | 8p23.1   | PPP1R3B - TNKS     | rs9987289-A | 0,1  | 22,161 European ancestry individuals            | NR                                                                                    | 21386085 | Diabetes                      |
| HDL | established | 8p23.1   | PPP1R3B - TNKS     | rs9987289-A | 0,1  | Up to 100,184 European descent individuals      |                                                                                       | 20686565 | Nature                        |
| HDL | established | 16q13    | HERPUD1 - CETP     | rs9989419-G | 0,1  | Up to 4,274 European ancestry individuals       | Up to 15,873 European ancestry individuals                                            | 20031538 | Circ Cardiovasc Genet         |
| HDL | established | 16q13    | HERPUD1 - CETP     | rs9989419-G | 0,1  | up to 17,243 white European descent individuals | up to 37,774 white European descent individuals, up to 9,665 Indian Asian individuals | 20864672 | Arterioscler Thromb Vasc Biol |
| HDL | established | 16q13    | HERPUD1 - CETP     | rs9989419-G | 0,1  | 8,656 individuals                               | 11,399 individuals                                                                    | 18193043 | Nat Genet                     |

|             |                       |         |          |              |        |                                  |                               |          |                       |
|-------------|-----------------------|---------|----------|--------------|--------|----------------------------------|-------------------------------|----------|-----------------------|
| homocystein | less well established | 11q14.3 | NOX4     | rs10501705-C | -0,05  | 13,974 European ancestry females | 840 European ancestry females | 20031578 | Circ Cardiovasc Genet |
| homocystein | less well established | 11q14.3 | NOX4     | rs11018628-G | -0,05  | 13,974 European ancestry females | 840 European ancestry females | 20031578 | Circ Cardiovasc Genet |
| homocystein | less well established | 16q24.3 | DPEP1    | rs1126464-G  | -0,031 | 13,974 European ancestry females | 840 European ancestry females | 20031578 | Circ Cardiovasc Genet |
| homocystein | less well established | 1p36.22 | C1orf167 | rs12564559-G | -0,034 | 13,974 European ancestry females | 840 European ancestry females | 20031578 | Circ Cardiovasc Genet |
| homocystein | less well established | 1p36.22 | MTHFR    | rs17367504-G | -0,035 | 13,974 European ancestry females | 840 European ancestry females | 20031578 | Circ Cardiovasc Genet |
| homocystein | less well established | 1p36.22 | MTHFR    | rs1801133-A  | 0,048  | 13,974 European ancestry females | 840 European ancestry females | 20031578 | Circ Cardiovasc Genet |
| homocystein | less well established | 1p36.22 | NPPA     | rs198358-G   | -0,034 | 13,974 European ancestry females | 840 European ancestry females | 20031578 | Circ Cardiovasc Genet |
| homocystein | less well established | 1p36.22 | CLCN6    | rs198414-A   | -0,031 | 13,974 European ancestry females | 840 European ancestry females | 20031578 | Circ Cardiovasc Genet |
| homocystein | less well established | 1p36.22 | RNU5E    | rs1999594-A  | -0,025 | 13,974 European ancestry females | 840 European ancestry females | 20031578 | Circ Cardiovasc Genet |
| homocystein | less well established | 15q25.3 | AKAP13   | rs2061821-A  | 0,019  | 13,974 European ancestry females | 840 European ancestry females | 20031578 | Circ Cardiovasc Genet |
| homocystein | less well established | 1p36.22 | CLCN6    | rs2076003-G  | -0,062 | 13,974 European ancestry females | 840 European ancestry females | 20031578 | Circ Cardiovasc Genet |
| homocystein | less well established | 1p36.22 | MTHFR    | rs2274976-A  | -0,062 | 13,974 European ancestry females | 840 European ancestry females | 20031578 | Circ Cardiovasc Genet |
| homocystein | less well established | 16q24.3 | C16orf55 | rs2377058-G  | -0,019 | 13,974 European ancestry females | 840 European ancestry females | 20031578 | Circ Cardiovasc Genet |
| homocystein | less well established | 6p12.3  | MUT      | rs2501976-A  | 0,021  | 13,974 European ancestry females | 840 European ancestry females | 20031578 | Circ Cardiovasc Genet |
| homocystein | less well established | 1p36.22 | KIAA2013 | rs2639453-A  | 0,032  | 13,974 European ancestry females | 840 European ancestry females | 20031578 | Circ Cardiovasc Genet |
| homocystein | less well established | 11q14.3 | NOX4     | rs317148-G   | -0,019 | 13,974 European ancestry females | 840 European ancestry females | 20031578 | Circ Cardiovasc Genet |
| homocystein | less well established | 11q14.3 | NOX4     | rs317150-A   | -0,041 | 13,974 European ancestry females | 840 European ancestry females | 20031578 | Circ Cardiovasc Genet |
| homocystein | less well established | 11q14.3 | NOX4     | rs317191-A   | -0,048 | 13,974 European ancestry females | 840 European ancestry females | 20031578 | Circ Cardiovasc Genet |
| homocystein | less well established | 11q14.3 | NOX4     | rs319016-A   | 0,019  | 13,974 European ancestry females | 840 European ancestry females | 20031578 | Circ Cardiovasc Genet |

|             |                       |          |                  |              |         |                                  |                               |          |                      |
|-------------|-----------------------|----------|------------------|--------------|---------|----------------------------------|-------------------------------|----------|----------------------|
| homocystein | less well established | 1p36.22  | MTHFR            | rs3737967-A  | -0,063  | 13,974 European ancestry females | 840 European ancestry females | 20031578 | Circ Cardioasc Genet |
| homocystein | less well established | 6p12.3   | CENPQ            | rs4267943-A  | 0,024   | 13,974 European ancestry females | 840 European ancestry females | 20031578 | Circ Cardioasc Genet |
| homocystein | less well established | 16q24.3  | C16orf55         | rs459920-G   | 0,024   | 13,974 European ancestry females | 840 European ancestry females | 20031578 | Circ Cardioasc Genet |
| homocystein | less well established | 16q24.3  | CHMP1A           | rs460879-A   | 0,026   | 13,974 European ancestry females | 840 European ancestry females | 20031578 | Circ Cardioasc Genet |
| homocystein | less well established | 1p36.22  | NPPA             | rs5063-A     | -0,055  | 13,974 European ancestry females | 840 European ancestry females | 20031578 | Circ Cardioasc Genet |
| homocystein | less well established | 1p36.22  | NPPA             | rs5065-G     | -0,028  | 13,974 European ancestry females | 840 European ancestry females | 20031578 | Circ Cardioasc Genet |
| homocystein | less well established | 6p12.3   | MUT              | rs6458690-G  | 0,021   | 13,974 European ancestry females | 840 European ancestry females | 20031578 | Circ Cardioasc Genet |
| homocystein | less well established | 21q22.3  | CBS              | rs6586282-A  | -0,03   | 13,974 European ancestry females | 840 European ancestry females | 20031578 | Circ Cardioasc Genet |
| homocystein | less well established | 1p36.22  | KIAA2013         | rs6682554-A  | 0,024   | 13,974 European ancestry females | 840 European ancestry females | 20031578 | Circ Cardioasc Genet |
| homocystein | less well established | 2q34     | CPS1             | rs7422339-A  | 0,027   | 13,974 European ancestry females | 840 European ancestry females | 20031578 | Circ Cardioasc Genet |
| homocystein | less well established | 1p36.22  | CLCN6            | rs7537765-G  | -0,035  | 13,974 European ancestry females | 840 European ancestry females | 20031578 | Circ Cardioasc Genet |
| homocystein | less well established | 1p36.22  | MFN2             | rs7550536-A  | 0,021   | 13,974 European ancestry females | 840 European ancestry females | 20031578 | Circ Cardioasc Genet |
| homocystein | less well established | 11q14.3  | NOX4             | rs7929532-G  | -0,048  | 13,974 European ancestry females | 840 European ancestry females | 20031578 | Circ Cardioasc Genet |
| homocystein | less well established | 11q14.3  | NOX4             | rs9299894-A  | -0,05   | 13,974 European ancestry females | 840 European ancestry females | 20031578 | Circ Cardioasc Genet |
| homocystein | less well established | 6p12.3   | MUT              | rs9473558-A  | 0,02    | 13,974 European ancestry females | 840 European ancestry females | 20031578 | Circ Cardioasc Genet |
| HTN         | established           | 10p12.31 | CACNB2           | rs11014166-A | 0,09    | 29,136 individuals               | 34,433 individuals            | 19430479 | Nat Genet            |
| HTN         | established           | 10p12.31 | CACNB2           | rs11014166-A | 0,09    | 29,136 individuals               | 34,433 individuals            | 19430479 | Nat Genet            |
| HTN         | established           | 10p12.31 | CACNB2           | rs11014166-A | 0,09    | 29,136 individuals               | 34,433 individuals            | 19430479 | Nat Genet            |
| HTN         | established           | 16q23.3  | MPHOSPH6 - CDH13 | rs11646213-T | 0,24686 | 364 cases, 590 controls          | 1,043 cases, 1,769 controls   | 19304780 | Hum Mol Genet        |

|     |             |          |                  |              |         |                                                                          |                                                                        |          |            |
|-----|-------------|----------|------------------|--------------|---------|--------------------------------------------------------------------------|------------------------------------------------------------------------|----------|------------|
| HTN | established | 5p13.3   | -                | rs1173771-G  | 0,062   | 69,395 European ancestry individuals                                     | Up to 133,361 European ancestry individuals                            | 21909115 | Nature     |
| HTN | established | 5p13.3   | -                | rs1173771-G  | 0,062   | 69,395 European ancestry individuals                                     | Up to 133,361 European ancestry individuals                            | 21909115 | Nature     |
| HTN | established | 5p13.3   | -                | rs1173771-G  | 0,062   | 69,395 European ancestry individuals                                     | Up to 133,361 European ancestry individuals                            | 21909115 | Nature     |
| HTN | established | 5p13.3   | -                | rs1173771-G  | 0,062   | 74,064 European ancestry individuals                                     | 48,607 European ancestry individuals                                   | 21909110 | Nat Genet  |
| HTN | established | 5p13.3   | -                | rs1173771-G  | 0,062   | 74,064 European ancestry individuals                                     | 48,607 European ancestry individuals                                   | 21909110 | Nat Genet  |
| HTN | established | 8p23.1   | MSRA             | rs11775334-A | 0,08    | 29,136 individuals                                                       | 34,433 individuals                                                     | 19430479 | Nat Genet  |
| HTN | established | 16p12.3  | UMOD             | rs13333226-A | 0,13976 | 1,621 Swedish cases, 1,699 Swedish controls                              | 19,845 European ancestry cases, 16,541 European ancestry controls      | 21082022 | PLoS Genet |
| HTN | established | 15q24.1  | CSK              | rs1378942-C  | 0,0726  | 69,395 European ancestry individuals                                     | Up to 133,361 European ancestry individuals                            | 21909115 | Nature     |
| HTN | established | 15q24.1  | CSK              | rs1378942-C  | 0,0726  | 69,395 European ancestry individuals                                     | Up to 133,361 European ancestry individuals                            | 21909115 | Nature     |
| HTN | established | 15q24.1  | CSK              | rs1378942-C  | 0,0726  | 74,064 European ancestry individuals                                     | 48,607 European ancestry individuals                                   | 21909110 | Nat Genet  |
| HTN | established | 15q24.1  | CSK              | rs1378942-C  | 0,0726  | 34,433 individuals                                                       | Up to 100,347 white individuals, up to 12,889 Indian Asian individuals | 19430483 | Nat Genet  |
| HTN | established | 20q13.32 | MRPS16P - ZNF831 | rs16982520-A | 0,13    | 29,136 individuals                                                       | 34,433 individuals                                                     | 19430479 | Nat Genet  |
| HTN | established | 12q21.33 | ATP2B1 - MRPL2P1 | rs17249754-G | 0,1261  | 8,842 Korean ancestry individuals                                        | 7,861 Korean ancestry individuals                                      | 19396169 | Nat Genet  |
| HTN | established | 12q21.33 | ATP2B1 - MRPL2P1 | rs17249754-G | 0,1261  | 8,842 Korean ancestry individuals                                        | 7,861 Korean ancestry individuals                                      | 19396169 | Nat Genet  |
| HTN | established | 12q21.33 | ATP2B1 - MRPL2P1 | rs17249754-G | 0,1261  | 74,064 European ancestry individuals                                     | 48,607 European ancestry individuals                                   | 21909110 | Nat Genet  |
| HTN | established | 12q21.33 | ATP2B1 - MRPL2P1 | rs17249754-G | 0,1261  | 74,064 European ancestry individuals                                     | 48,607 European ancestry individuals                                   | 21909110 | Nat Genet  |
| HTN | established | 12q21.33 | ATP2B1 - MRPL2P1 | rs17249754-G | 0,1261  | 17,089 East Asian ancestry individuals, 2,519 Malay ancestry individuals | 30,765 East Asian ancestry individuals                                 | 21572416 | Nat Genet  |

|     |             |          |                  |              |         |                                                                          |                                                                        |          |               |
|-----|-------------|----------|------------------|--------------|---------|--------------------------------------------------------------------------|------------------------------------------------------------------------|----------|---------------|
| HTN | established | 12q21.33 | ATP2B1 - MRPL2P1 | rs17249754-G | 0,1261  | 17,089 East Asian ancestry individuals, 2,519 Malay ancestry individuals | 30,765 East Asian ancestry individuals                                 | 21572416 | Nat Genet     |
| HTN | established | 1p36.22  | MTHFR            | rs17367504-G | -0,1031 | 74,064 European ancestry individuals                                     | 48,607 European ancestry individuals                                   | 21909110 | Nat Genet     |
| HTN | established | 1p36.22  | MTHFR            | rs17367504-G | -0,1031 | 34,433 individuals                                                       | Up to 100,347 white individuals, up to 12,889 Indian Asian individuals | 19430483 | Nat Genet     |
| HTN | established | 6p22.2   | HFE              | rs1799945-G  | 0,0947  | Up to 5,633 Caucasian individuals                                        | Up to 3,457 Caucasian individuals                                      | 21208937 | Hum Mol Genet |
| HTN | established | 6p22.2   | HFE              | rs1799945-G  | 0,0947  | 69,395 European ancestry individuals                                     | Up to 133,361 European ancestry individuals                            | 21909115 | Nature        |
| HTN | established | 6p22.2   | HFE              | rs1799945-G  | 0,0947  | 69,395 European ancestry individuals                                     | Up to 133,361 European ancestry individuals                            | 21909115 | Nature        |
| HTN | established | 6p22.2   | HFE              | rs1799945-G  | 0,0947  | 69,395 European ancestry individuals                                     | Up to 133,361 European ancestry individuals                            | 21909115 | Nature        |
| HTN | established | 15q26.2  | -                | rs2398162-A  | 0,27003 | 1,952 cases,2,938 controls                                               | NR                                                                     | 17554300 | Nature        |
| HTN | established | 12q21.33 | ATP2B1           | rs2681472-A  | 0,15    | 29,136 individuals                                                       | 34,433 individuals                                                     | 19430479 | Nat Genet     |
| HTN | established | 12q21.33 | ATP2B1           | rs2681472-A  | 0,15    | 29,136 individuals                                                       | 34,433 individuals                                                     | 19430479 | Nat Genet     |
| HTN | established | 1q43     | RPL39P10 - CHRM3 | rs2820037-T  | 0,43178 | 1,952 cases,2,938 controls                                               | NR                                                                     | 17554300 | Nature        |
| HTN | established | 10q21.2  | C10orf107        | rs4590817-G  | 0,0961  | 74,064 European ancestry individuals                                     | 48,607 European ancestry individuals                                   | 21909110 | Nat Genet     |
| HTN | established | 20q13.32 | MRPS16P - ZNF831 | rs6015450-G  | 0,1104  | 69,395 European ancestry individuals                                     | Up to 133,361 European ancestry individuals                            | 21909115 | Nature        |
| HTN | established | 20q13.32 | MRPS16P - ZNF831 | rs6015450-G  | 0,1104  | 69,395 European ancestry individuals                                     | Up to 133,361 European ancestry individuals                            | 21909115 | Nature        |
| HTN | established | 20q13.32 | MRPS16P - ZNF831 | rs6015450-G  | 0,1104  | 69,395 European ancestry individuals                                     | Up to 133,361 European ancestry individuals                            | 21909115 | Nature        |
| HTN | established | 20q13.32 | MRPS16P - ZNF831 | rs6015450-G  | 0,1104  | 74,064 European ancestry individuals                                     | 48,607 European ancestry individuals                                   | 21909110 | Nat Genet     |
| HTN | established | 20q13.32 | MRPS16P - ZNF831 | rs6015450-G  | 0,1104  | 74,064 European ancestry individuals                                     | 48,607 European ancestry individuals                                   | 21909110 | Nat Genet     |
| HTN | established | 11q22.1  | ARHGAP42         | rs633185-G   | -0,0702 | 69,395 European                                                          | Up to 133,361 European                                                 | 21909115 | Nature        |



|     |             |          |              |              |         |                                                 |                                                                                       |          |                               |
|-----|-------------|----------|--------------|--------------|---------|-------------------------------------------------|---------------------------------------------------------------------------------------|----------|-------------------------------|
|     |             |          |              |              |         | ancestry individuals                            | ancestry individuals                                                                  |          |                               |
| HTN | established | 11q22.1  | ARHGAP42     | rs633185-G   | -0,0702 | 69,395 European ancestry individuals            | Up to 133,361 European ancestry individuals                                           | 21909115 | Nature                        |
| HTN | established | 11q22.1  | ARHGAP42     | rs633185-G   | -0,0702 | 69,395 European ancestry individuals            | Up to 133,361 European ancestry individuals                                           | 21909115 | Nature                        |
| HTN | established | 11q22.1  | ARHGAP42     | rs633185-G   | -0,0702 | 74,064 European ancestry individuals            | 48,607 European ancestry individuals                                                  | 21909110 | Nat Genet                     |
| HTN | established | 6p21.33  | BAG6         | rs805303-G   | 0,0537  | 69,395 European ancestry individuals            | Up to 133,361 European ancestry individuals                                           | 21909115 | Nature                        |
| HTN | established | 6p21.33  | BAG6         | rs805303-G   | 0,0537  | 69,395 European ancestry individuals            | Up to 133,361 European ancestry individuals                                           | 21909115 | Nature                        |
| HTN | established | 6p21.33  | BAG6         | rs805303-G   | 0,0537  | 69,395 European ancestry individuals            | Up to 133,361 European ancestry individuals                                           | 21909115 | Nature                        |
| HTN | established | 10q23.33 | PLCE1        | rs932764-G   | 0,0551  | 69,395 European ancestry individuals            | Up to 133,361 European ancestry individuals                                           | 21909115 | Nature                        |
| HTN | established | 10q23.33 | PLCE1        | rs932764-G   | 0,0551  | 69,395 European ancestry individuals            | Up to 133,361 European ancestry individuals                                           | 21909115 | Nature                        |
| HTN | established | 10q23.33 | PLCE1        | rs932764-G   | 0,0551  | 69,395 European ancestry individuals            | Up to 133,361 European ancestry individuals                                           | 21909115 | Nature                        |
| LDL | established | 19p13.11 | SUGP1        | rs10401969-T | 0,1     | Up to 100,184 European descent individuals      |                                                                                       | 20686565 | Nature                        |
| LDL | established | 19p13.11 | SUGP1        | rs10401969-T | 0,1     | Up to 95,454 European descent individuals       |                                                                                       | 20686565 | Nature                        |
| LDL | established | 19p13.11 | SUGP1        | rs10401969-T | 0,1     | 19,840 individuals                              | Up to 20,623 individuals                                                              | 19060906 | Nat Genet                     |
| LDL | established | 19p13.11 | SUGP1        | rs10401969-T | 0,1     | up to 17,243 white European descent individuals | up to 37,774 white European descent individuals, up to 9,665 Indian Asian individuals | 20864672 | Arterioscler Thromb Vasc Biol |
| LDL | established | 1p31.3   | DOCK7        | rs10889353-C | -0,1    | 22,562 individuals                              | NR                                                                                    | 19060911 | Nat Genet                     |
| LDL | established | 1p31.3   | DOCK7        | rs10889353-C | -0,1    | 17,797 individuals                              | NR                                                                                    | 19060911 | Nat Genet                     |
| LDL | established | 1p32.3   | BSND - PCSK9 | rs11206510-T | 0,1     | 19,840 individuals                              | Up to 20,623 individuals                                                              | 19060906 | Nat Genet                     |
| LDL | established | 1p32.3   | BSND - PCSK9 | rs11206510-T | 0,1     | up to 17,243 white European descent individuals | up to 37,774 white European descent individuals, up to 9,665                          | 20864672 | Arterioscler Thromb Vasc Biol |

|     |             |          |                  |              |      |                                                 |                                                                                       |          |                               |
|-----|-------------|----------|------------------|--------------|------|-------------------------------------------------|---------------------------------------------------------------------------------------|----------|-------------------------------|
|     |             |          |                  |              |      |                                                 | Indian Asian individuals                                                              |          |                               |
| LDL | established | 1p32.3   | BSND - PCSK9     | rs11206510-T | 0,1  | 8,589 individuals                               | 7,440-10,783 individuals                                                              | 18193043 | Nat Genet                     |
| LDL | established | 1p32.3   | PCSK9            | rs11591147-T | -0,1 | 2,758 individuals                               | 18,544 individuals                                                                    | 18193044 | Nat Genet                     |
| LDL | established | 19p13.2  | SMARCA4 - LDLR   | rs11668477-G | -0,1 | 4,763 individuals                               | NR                                                                                    | 19060910 | Nat Genet                     |
| LDL | established | 11q23.3  | RPL15P15 - BUD13 | rs12272004-C | -0,1 | 22,562 individuals                              | NR                                                                                    | 19060911 | Nat Genet                     |
| LDL | established | 11q23.3  | RPL15P15 - BUD13 | rs12272004-C | -0,1 | 17,797 individuals                              | NR                                                                                    | 19060911 | Nat Genet                     |
| LDL | established | 5q13.3   | HMGCR            | rs12654264-T | 0,1  | 2,758 individuals                               | 18,544 individuals                                                                    | 18193044 | Nat Genet                     |
| LDL | established | 7p15.3   | DNAH11           | rs12670798-G | 0,1  | Up to 95,454 European descent individuals       |                                                                                       | 20686565 | Nature                        |
| LDL | established | 7p15.3   | DNAH11           | rs12670798-G | 0,1  | 22,562 individuals                              | NR                                                                                    | 19060911 | Nat Genet                     |
| LDL | established | 7p15.3   | DNAH11           | rs12670798-G | 0,1  | 17,797 individuals                              | NR                                                                                    | 19060911 | Nat Genet                     |
| LDL | established | 7p15.3   | DNAH11           | rs12670798-G | 0,1  | Up to 100,184 European descent individuals      |                                                                                       | 20686565 | Nature                        |
| LDL | established | 1p13.3   | CELSR2           | rs12740374-T | -0,1 | 19,840 individuals                              | Up to 20,623 individuals                                                              | 19060906 | Nat Genet                     |
| LDL | established | 5q13.3   | HMGCR            | rs12916-T    | -0,1 | Up to 100,184 European descent individuals      |                                                                                       | 20686565 | Nature                        |
| LDL | established | 5q13.3   | HMGCR            | rs12916-T    | -0,1 | Up to 95,454 European descent individuals       |                                                                                       | 20686565 | Nature                        |
| LDL | established | 5q13.3   | HMGCR            | rs12916-T    | -0,1 | up to 17,243 white European descent individuals | up to 37,774 white European descent individuals, up to 9,665 Indian Asian individuals | 20864672 | Arterioscler Thromb Vasc Biol |
| LDL | established | 5q33.3   | TIMD4 - HAVCR1   | rs1501908-G  | -0,1 | 19,840 individuals                              | Up to 20,623 individuals                                                              | 19060906 | Nat Genet                     |
| LDL | established | 11q23.3  | RPL15P15 - BUD13 | rs1558861-T  | -0,1 | up to 17,243 white European descent individuals | up to 37,774 white European descent individuals, up to 9,665 Indian Asian individuals | 20864672 | Arterioscler Thromb Vasc Biol |
| LDL | established | 19q13.32 | TOMM40           | rs157580-G   | -0,1 | 17,797 individuals                              | NR                                                                                    | 19060911 | Nat Genet                     |

|     |             |          |                      |              |      |                                                 |                                                                                       |          |                               |
|-----|-------------|----------|----------------------|--------------|------|-------------------------------------------------|---------------------------------------------------------------------------------------|----------|-------------------------------|
| LDL | established | 19q13.32 | TOMM40               | rs157580-G   | -0,1 | 4,763 individuals                               | NR                                                                                    | 19060910 | Nat Genet                     |
| LDL | established | 19p13.11 | CILP2 - PBX4         | rs16996148-T | -0,1 | 8,589 individuals                               | 7,440-10,783 individuals                                                              | 18193043 | Nat Genet                     |
| LDL | established | 19p13.11 | CILP2 - PBX4         | rs16996148-T | -0,1 | 2,758 individuals                               | 18,544 individuals                                                                    | 18193044 | Nat Genet                     |
| LDL | established | 11q12.2  | FADS1                | rs174546-A   | -0,1 | 4,763 individuals                               | NR                                                                                    | 19060910 | Nat Genet                     |
| LDL | established | 11q12.2  | FADS1                | rs174546-A   | -0,1 | Up to 100,184 European descent individuals      |                                                                                       | 20686565 | Nature                        |
| LDL | established | 11q12.2  | FADS1                | rs174546-A   | -0,1 | Up to 95,454 European descent individuals       |                                                                                       | 20686565 | Nature                        |
| LDL | established | 11q12.2  | FADS2                | rs174570-G   | 0,1  | 22,562 individuals                              | NR                                                                                    | 19060911 | Nat Genet                     |
| LDL | established | 11q12.2  | FADS2                | rs174570-G   | 0,1  | 17,797 individuals                              | NR                                                                                    | 19060911 | Nat Genet                     |
| LDL | established | 8p23.1   | PPP1R3B - TNKS       | rs2126259-A  | -0,1 | up to 17,243 white European descent individuals | up to 37,774 white European descent individuals, up to 9,665 Indian Asian individuals | 20864672 | Arterioscler Thromb Vasc Biol |
| LDL | established | 6p22.3   | MRPL42P2 - GMPR      | rs2142672-C  | 0,1  | up to 17,243 white European descent individuals | up to 37,774 white European descent individuals, up to 9,665 Indian Asian individuals | 20864672 | Arterioscler Thromb Vasc Biol |
| LDL | established | 19p13.2  | LDLR                 | rs2228671-G  | 0,1  | 22,562 individuals                              | NR                                                                                    | 19060911 | Nat Genet                     |
| LDL | established | 19p13.2  | LDLR                 | rs2228671-G  | 0,1  | 17,797 individuals                              | NR                                                                                    | 19060911 | Nat Genet                     |
| LDL | established | 6p21.32  | COL11A2;RXRB         | rs2254287-G  | 0,1  | 8,589 individuals                               | 7,440-10,783 individuals                                                              | 18193043 | Nat Genet                     |
| LDL | established | 19p13.11 | ZNF101               | rs2304130-G  | -0,1 | 22,562 individuals                              | NR                                                                                    | 19060911 | Nat Genet                     |
| LDL | established | 19p13.11 | ZNF101               | rs2304130-G  | -0,1 | 17,797 individuals                              | NR                                                                                    | 19060911 | Nat Genet                     |
| LDL | established | 12q24.31 | RPL12P33 - HNF1A-AS1 | rs2650000-A  | 0,1  | 19,840 individuals                              | Up to 20,623 individuals                                                              | 19060906 | Nat Genet                     |
| LDL | established | 19p13.2  | LDLR                 | rs2738459-C  | -0,1 | up to 17,243 white European descent individuals | up to 37,774 white European descent individuals, up to 9,665 Indian Asian individuals | 20864672 | Arterioscler Thromb Vasc Biol |
| LDL | established | 8q24.13  | TRIB1 - FAM84B       | rs2954021-   | -0,1 | up to 17,243 white                              | up to 37,774 white                                                                    | 20864672 | Arterioscler                  |

|     |             |          |               |             |      |                                                 |                                                                                       |          |                               |
|-----|-------------|----------|---------------|-------------|------|-------------------------------------------------|---------------------------------------------------------------------------------------|----------|-------------------------------|
|     |             |          |               | G           |      | European descent individuals                    | European descent individuals, up to 9,665<br>Indian Asian individuals                 |          | Thromb Vasc Biol              |
| LDL | established | 5q13.3   | HMGCR         | rs3846662-G | 0,1  | 22,562 individuals                              | NR                                                                                    | 19060911 | Nat Genet                     |
| LDL | established | 5q13.3   | HMGCR         | rs3846662-G | 0,1  | 17,797 individuals                              | NR                                                                                    | 19060911 | Nat Genet                     |
| LDL | established | 5q13.3   | HMGCR         | rs3846663-T | 0,1  | 19,840 individuals                              | Up to 20,623 individuals                                                              | 19060906 | Nat Genet                     |
| LDL | established | 19q13.32 | APOC1         | rs4420638-G | 0,1  | 2,346 Micronesian individuals                   | 1,464 European ancestry cases,1,467 European ancestry controls                        | 18802019 | Arterioscler Thromb Vasc Biol |
| LDL | established | 19q13.32 | APOC1         | rs4420638-G | 0,1  | Up to 100,184 European descent individuals      |                                                                                       | 20686565 | Nature                        |
| LDL | established | 19q13.32 | APOC1         | rs4420638-G | 0,1  | up to 17,243 white European descent individuals | up to 37,774 white European descent individuals, up to 9,665 Indian Asian individuals | 20864672 | Arterioscler Thromb Vasc Biol |
| LDL | established | 19q13.32 | APOC1         | rs4420638-G | 0,1  | Up to 95,454 European descent individuals       |                                                                                       | 20686565 | Nature                        |
| LDL | established | 19q13.32 | APOC1         | rs4420638-G | 0,1  | 19,840 individuals                              | Up to 20,623 individuals                                                              | 19060906 | Nat Genet                     |
| LDL | established | 19q13.32 | APOC1         | rs4420638-G | 0,1  | 11,685 individuals                              | 5,036 individuals                                                                     | 18262040 | Lancet                        |
| LDL | established | 19q13.32 | APOC1         | rs4420638-G | 0,1  | 2,758 individuals                               | 18,544 individuals                                                                    | 18193044 | Nat Genet                     |
| LDL | established | 19q13.32 | APOC1         | rs4420638-G | 0,1  | 8,589 individuals                               | 7,440-10,783 individuals                                                              | 18193043 | Nat Genet                     |
| LDL | established | 1q32.2   | CR1L          | rs4844614-A | 0,1  | 4,763 individuals                               | NR                                                                                    | 19060910 | Nat Genet                     |
| LDL | established | Xq12     | AR            | rs5031002-A | 0,1  | 4,763 individuals                               | NR                                                                                    | 19060910 | Nat Genet                     |
| LDL | established | 2p24.1   | APOB - KLHL29 | rs515135-A  | -0,1 | up to 17,243 white European descent individuals | up to 37,774 white European descent individuals, up to 9,665 Indian Asian individuals | 20864672 | Arterioscler Thromb Vasc Biol |
| LDL | established | 2p24.1   | APOB - KLHL29 | rs515135-A  | -0,1 | 19,840 individuals                              | Up to 20,623 individuals                                                              | 19060906 | Nat Genet                     |
| LDL | established | 2p24.1   | APOB - KLHL29 | rs562338-T  | -0,1 | 8,589 individuals                               | 7,440-10,783 individuals                                                              | 18193043 | Nat Genet                     |

|     |             |         |                |             |      |                                                 |                                                                                       |          |                               |
|-----|-------------|---------|----------------|-------------|------|-------------------------------------------------|---------------------------------------------------------------------------------------|----------|-------------------------------|
| LDL | established | 2p24.1  | APOB - KLHL29  | rs562338-T  | -0,1 | 11,685 individuals                              | 5,036 individuals                                                                     | 18262040 | Lancet                        |
| LDL | established | 1p13.3  | PSRC1          | rs599839-G  | -0,1 | 8,589 individuals                               | 7,440-10,783 individuals                                                              | 18193043 | Nat Genet                     |
| LDL | established | 1p13.3  | PSRC1          | rs599839-G  | -0,1 | 11,685 individuals                              | 5,036 individuals                                                                     | 18262040 | Lancet                        |
| LDL | established | 1p13.3  | PSRC1          | rs599839-G  | -0,1 | 1,955 hypertensive individuals                  | 2,033 individuals in 519 families; 1,461 twins (1/pair selected randomly)             | 18179892 | Am J Hum Genet                |
| LDL | established | 20q12   | HSPE1P1 - MAFB | rs6102059-T | -0,1 | 19,840 individuals                              | Up to 20,623 individuals                                                              | 19060906 | Nat Genet                     |
| LDL | established | 19p13.2 | LDLR           | rs6511720-T | 0,1  | 8,589 individuals                               | 7,440-10,783 individuals                                                              | 18193043 | Nat Genet                     |
| LDL | established | 19p13.2 | LDLR           | rs6511720-T | 0,1  | Up to 100,184 European descent individuals      |                                                                                       | 20686565 | Nature                        |
| LDL | established | 19p13.2 | LDLR           | rs6511720-T | 0,1  | Up to 95,454 European descent individuals       |                                                                                       | 20686565 | Nature                        |
| LDL | established | 19p13.2 | LDLR           | rs6511720-T | 0,1  | 19,840 individuals                              | Up to 20,623 individuals                                                              | 19060906 | Nat Genet                     |
| LDL | established | 19p13.2 | LDLR           | rs6511720-T | 0,1  | 2,758 individuals                               | 18,544 individuals                                                                    | 18193044 | Nat Genet                     |
| LDL | established | 2p21    | ABCG8          | rs6544713-T | 0,1  | 19,840 individuals                              | Up to 20,623 individuals                                                              | 19060906 | Nat Genet                     |
| LDL | established | 1p13.3  | CELSR2         | rs660240-A  | -0,1 | up to 17,243 white European descent individuals | up to 37,774 white European descent individuals, up to 9,665 Indian Asian individuals | 20864672 | Arterioscler Thromb Vasc Biol |
| LDL | established | 2p21    | ABCG5;ABCG8    | rs6756629-G | 0,1  | 22,562 individuals                              | NR                                                                                    | 19060911 | Nat Genet                     |
| LDL | established | 2p21    | ABCG5;ABCG8    | rs6756629-G | 0,1  | 17,797 individuals                              | NR                                                                                    | 19060911 | Nat Genet                     |
| LDL | established | 2p24.1  | APOB           | rs693-A     | 0,1  | 4,763 individuals                               | NR                                                                                    | 19060910 | Nat Genet                     |
| LDL | established | 2p24.1  | APOB           | rs693-A     | 0,1  | 2,758 individuals                               | 18,544 individuals                                                                    | 18193044 | Nat Genet                     |
| LDL | established | 2p24.1  | APOB           | rs693-A     | 0,1  | 22,562 individuals                              | NR                                                                                    | 19060911 | Nat Genet                     |
| LDL | established | 2p24.1  | APOB           | rs693-A     | 0,1  | 17,797 individuals                              | NR                                                                                    | 19060911 | Nat Genet                     |
| LDL | established | 8q24.13 | TRIB1 - FAM84B | rs6987702-G | 0,1  | 22,562 individuals                              | NR                                                                                    | 19060911 | Nat Genet                     |
| LDL | established | 8q24.13 | TRIB1 - FAM84B | rs6987702-G | 0,1  | 17,797 individuals                              | NR                                                                                    | 19060911 | Nat Genet                     |

|                       |             |          |                    |              |             |                                                                    |                                                                                       |          |              |
|-----------------------|-------------|----------|--------------------|--------------|-------------|--------------------------------------------------------------------|---------------------------------------------------------------------------------------|----------|--------------|
| myocardial infarction | established | 9p21.3   | UBA52P6 - DMRTA1   | rs10757278-G | 0,246860078 | 1,607 cases,6,728 controls                                         | 2,980 cases,6,309 controls                                                            | 17478679 | Science      |
| myocardial infarction | established | 1p32.3   | BSND - PCSK9       | rs11206510-T | 0,139761942 | 22,233 European ancestry cases, 64,762 European ancestry controls  | 28,834 cases, 27,674 controls, 2,115 individuals.                                     | 21378990 | Nat Genet    |
| myocardial infarction | established | 1p32.3   | BSND - PCSK9       | rs11206510-T | 0,139761942 | 2,967 cases, 3,075 controls                                        | 9,746 cases, 9,746 controls                                                           | 19198609 | Nat Genet    |
| myocardial infarction | established | 19p13.2  | SMARCA4            | rs1122608-G  | 0,139761942 | 22,233 European ancestry cases, 64,762 European ancestry controls  | 28,834 cases, 27,674 controls, 2,115 individuals.                                     | 21378990 | Nat Genet    |
| myocardial infarction | established | 19p13.2  | SMARCA4            | rs1122608-G  | 0,139761942 | 2,967 cases, 3,075 controls                                        | 9,746 cases, 9,746 controls                                                           | 19198609 | Nat Genet    |
| myocardial infarction | established | 6p24.1   | PHACTR1            | rs12526453-C | 0,113328685 | 22,233 European ancestry cases, 64,762 European ancestry controls  | 28,834 cases, 27,674 controls, 2,115 individuals.                                     | 21378990 | Nat Genet    |
| myocardial infarction | established | 6p24.1   | PHACTR1            | rs12526453-C | 0,113328685 | 2,967 cases, 3,075 controls                                        | 9,746 cases, 9,746 controls                                                           | 19198609 | Nat Genet    |
| myocardial infarction | established | 10q11.21 | HNRNPA3P1 - CXCL12 | rs1746048-C  | 0,157003749 | 22,233 European ancestry cases, 64,762 European ancestry controls  | 28,834 cases, 27,674 controls, 2,115 individuals.                                     | 21378990 | Nat Genet    |
| myocardial infarction | established | 10q11.21 | HNRNPA3P1 - CXCL12 | rs1746048-C  | 0,157003749 | 2,967 cases, 3,075 controls                                        | 9,746 cases, 9,746 controls                                                           | 19198609 | Nat Genet    |
| myocardial infarction | established | 1q41     | MIA3               | rs17465637-C | 0,131028262 | 22,233 European ancestry cases, 64,762 European ancestry controls  | 28,834 cases, 27,674 controls, 2,115 individuals.                                     | 21378990 | Nat Genet    |
| myocardial infarction | established | 1q41     | MIA3               | rs17465637-C | 0,131028262 | 2,967 cases, 3,075 controls                                        | 9,746 cases, 9,746 controls                                                           | 19198609 | Nat Genet    |
| myocardial infarction | established | 1q41     | MIA3               | rs17465637-C | 0,131028262 | 1,926 cases,2,938 controls                                         | 875 cases,1,644 controls                                                              | 17634449 | N Engl J Med |
| myocardial infarction | established | 15q25.1  | ADAMTS7            | rs1994016-C  | 0,173953307 | 1,808 European ancestry AngCAD cases, 915 European ancestry AngCAD | 10,585 European ancestry AngCAD cases, 6,468 European ancestry AngCAD controls, 1,211 | 21239051 | Lancet       |

|                       |             |        |            |             |             |                                                                                                                                                                               |                                                                                                                                                                                |          |           |
|-----------------------|-------------|--------|------------|-------------|-------------|-------------------------------------------------------------------------------------------------------------------------------------------------------------------------------|--------------------------------------------------------------------------------------------------------------------------------------------------------------------------------|----------|-----------|
|                       |             |        |            |             |             | controls, 4,572 European ancestry AngCAD with MI cases, 2,739 European ancestry AngCAD without MI controls                                                                    | European ancestry AngCAD with MI cases, 905 European ancestry AngCAD without MI controls                                                                                       |          |           |
| myocardial infarction | established | 9p21.3 | CDKN2B-AS1 | rs4977574-G | 0,254642218 | 22,233 European ancestry cases, 64,762 European ancestry controls                                                                                                             | 28,834 cases, 27,674 controls, 2,115 individuals.                                                                                                                              | 21378990 | Nat Genet |
| myocardial infarction | established | 9p21.3 | CDKN2B-AS1 | rs4977574-G | 0,254642218 | 8,424 European ancestry cases, 7,268 European ancestry controls, 6,996 South Asian cases, 7,794 South Asian controls                                                          | 18,049 European ancestry cases, 16,357 European ancestry controls, 3,359 South Asian cases, 2,828 South Asian controls                                                         | 21378988 | Nat Genet |
| myocardial infarction | established | 9p21.3 | CDKN2B-AS1 | rs4977574-G | 0,254642218 | 2,967 cases, 3,075 controls                                                                                                                                                   | 9,746 cases, 9,746 controls                                                                                                                                                    | 19198609 | Nat Genet |
| myocardial infarction | established | 9q34.2 | ABO        | rs514659-C  | 0,190620359 | 1,808 European ancestry AngCAD cases, 915 European ancestry AngCAD controls, 4,572 European ancestry AngCAD with MI cases, 2,739 European ancestry AngCAD without MI controls | 10,585 European ancestry AngCAD cases, 6,468 European ancestry AngCAD controls, 1,211 European ancestry AngCAD with MI cases, 905 European ancestry AngCAD without MI controls | 21239051 | Lancet    |
| myocardial infarction | established | 1p13.3 | CELSR2     | rs646776-T  | 0,173953307 | 8,424 European ancestry cases, 7,268 European ancestry controls, 6,996 South Asian cases, 7,794 South Asian controls                                                          | 18,049 European ancestry cases, 16,357 European ancestry controls, 3,359 South Asian cases, 2,828 South Asian controls                                                         | 21378988 | Nat Genet |
| myocardial infarction | established | 1p13.3 | CELSR2     | rs646776-T  | 0,173953307 | 2,967 cases, 3,075 controls                                                                                                                                                   | 9,746 cases, 9,746 controls                                                                                                                                                    | 19198609 | Nat Genet |
| myocardial infarction | established | 2q33.2 | WDR12      | rs6725887-C | 0,157003749 | 22,233 European ancestry cases, 64,762 European ancestry                                                                                                                      | 28,834 cases, 27,674 controls, 2,115 individuals.                                                                                                                              | 21378990 | Nat Genet |

|                       |             |          |                   |              |             |                                                                   |                                                                        |          |           |
|-----------------------|-------------|----------|-------------------|--------------|-------------|-------------------------------------------------------------------|------------------------------------------------------------------------|----------|-----------|
|                       |             |          |                   |              |             | controls                                                          |                                                                        |          |           |
| myocardial infarction | established | 2q33.2   | WDR12             | rs6725887-C  | 0,157003749 | 2,967 cases, 3,075 controls                                       | 9,746 cases, 9,746 controls                                            | 19198609 | Nat Genet |
| myocardial infarction | established | 21q22.11 | LINC00310 - KCNE2 | rs9982601-T  | 0,182321557 | 22,233 European ancestry cases, 64,762 European ancestry controls | 28,834 cases, 27,674 controls, 2,115 individuals.                      | 21378990 | Nat Genet |
| myocardial infarction | established | 21q22.11 | LINC00310 - KCNE2 | rs9982601-T  | 0,182321557 | 2,967 cases, 3,075 controls                                       | 9,746 cases, 9,746 controls                                            | 19198609 | Nat Genet |
| SBP                   | established | 10q24.32 | CYP17A1           | rs1004467-A  | 0,1         | 29,136 individuals                                                | 34,433 individuals                                                     | 19430479 | Nat Genet |
| SBP                   | established | 10p12.31 | CACNB2            | rs11014166-A | 0,1         | 29,136 individuals                                                | 34,433 individuals                                                     | 19430479 | Nat Genet |
| SBP                   | established | 10p12.31 | CACNB2            | rs11014166-A | 0,1         | 29,136 individuals                                                | 34,433 individuals                                                     | 19430479 | Nat Genet |
| SBP                   | established | 10p12.31 | CACNB2            | rs11014166-A | 0,1         | 29,136 individuals                                                | 34,433 individuals                                                     | 19430479 | Nat Genet |
| SBP                   | established | 10q24.32 | NT5C2             | rs11191548-T | 0,1         | 74,064 European ancestry individuals                              | 48,607 European ancestry individuals                                   | 21909110 | Nat Genet |
| SBP                   | established | 10q24.32 | NT5C2             | rs11191548-T | 0,1         | 69,395 European ancestry individuals                              | Up to 133,361 European ancestry individuals                            | 21909115 | Nature    |
| SBP                   | established | 10q24.32 | NT5C2             | rs11191548-T | 0,1         | 34,433 individuals                                                | Up to 100,347 white individuals, up to 12,889 Indian Asian individuals | 19430483 | Nat Genet |
| SBP                   | established | 5p13.3   | -                 | rs1173771-G  | 0,5041      | 74,064 European ancestry individuals                              | 48,607 European ancestry individuals                                   | 21909110 | Nat Genet |
| SBP                   | established | 5p13.3   | -                 | rs1173771-G  | 0,5041      | 74,064 European ancestry individuals                              | 48,607 European ancestry individuals                                   | 21909110 | Nat Genet |
| SBP                   | established | 5p13.3   | -                 | rs1173771-G  | 0,5041      | 69,395 European ancestry individuals                              | Up to 133,361 European ancestry individuals                            | 21909115 | Nature    |
| SBP                   | established | 5p13.3   | -                 | rs1173771-G  | 0,5041      | 69,395 European ancestry individuals                              | Up to 133,361 European ancestry individuals                            | 21909115 | Nature    |
| SBP                   | established | 5p13.3   | -                 | rs1173771-G  | 0,5041      | 69,395 European ancestry individuals                              | Up to 133,361 European ancestry individuals                            | 21909115 | Nature    |
| SBP                   | established | 5q33.3   | RPL2P2 - EBF1     | rs11953630-T | -0,4119     | 69,395 European ancestry individuals                              | Up to 133,361 European ancestry individuals                            | 21909115 | Nature    |
| SBP                   | established | 5q33.3   | RPL2P2 - EBF1     | rs11953630-T | -0,4119     | 69,395 European ancestry individuals                              | Up to 133,361 European ancestry individuals                            | 21909115 | Nature    |



|     |             |          |                  |              |         |                                      |                                                                        |          |           |
|-----|-------------|----------|------------------|--------------|---------|--------------------------------------|------------------------------------------------------------------------|----------|-----------|
| SBP | established | 5q33.3   | RPLP2P2 - EBF1   | rs11953630-T | -0,4119 | 69,395 European ancestry individuals | Up to 133,361 European ancestry individuals                            | 21909115 | Nature    |
| SBP | established | 1p36.22  | CASZ1            | rs12046278-T | -0,1    | 29,136 individuals                   | 34,433 individuals                                                     | 19430479 | Nat Genet |
| SBP | established | 17q21.31 | ACBD4;PLCD3      | rs12946454-T | 0,1     | 34,433 individuals                   | Up to 100,347 white individuals, up to 12,889 Indian Asian individuals | 19430483 | Nat Genet |
| SBP | established | 4q24     | SLC39A8          | rs13107325-T | -0,9811 | 74,064 European ancestry individuals | 48,607 European ancestry individuals                                   | 21909110 | Nat Genet |
| SBP | established | 4q24     | SLC39A8          | rs13107325-T | -0,9811 | 69,395 European ancestry individuals | Up to 133,361 European ancestry individuals                            | 21909115 | Nature    |
| SBP | established | 4q24     | SLC39A8          | rs13107325-T | -0,9811 | 69,395 European ancestry individuals | Up to 133,361 European ancestry individuals                            | 21909115 | Nature    |
| SBP | established | 4q24     | SLC39A8          | rs13107325-T | -0,9811 | 69,395 European ancestry individuals | Up to 133,361 European ancestry individuals                            | 21909115 | Nature    |
| SBP | established | 20p12.2  | FAT1P1 - RPS11P1 | rs1327235-G  | 0,3404  | 74,064 European ancestry individuals | 48,607 European ancestry individuals                                   | 21909110 | Nat Genet |
| SBP | established | 20p12.2  | FAT1P1 - RPS11P1 | rs1327235-G  | 0,3404  | 69,395 European ancestry individuals | Up to 133,361 European ancestry individuals                            | 21909115 | Nature    |
| SBP | established | 20p12.2  | FAT1P1 - RPS11P1 | rs1327235-G  | 0,3404  | 69,395 European ancestry individuals | Up to 133,361 European ancestry individuals                            | 21909115 | Nature    |
| SBP | established | 15q24.1  | CSK              | rs1378942-C  | 0,6125  | 74,064 European ancestry individuals | 48,607 European ancestry individuals                                   | 21909110 | Nat Genet |
| SBP | established | 15q24.1  | CSK              | rs1378942-C  | 0,6125  | 69,395 European ancestry individuals | Up to 133,361 European ancestry individuals                            | 21909115 | Nature    |
| SBP | established | 15q24.1  | CSK              | rs1378942-C  | 0,6125  | 34,433 individuals                   | Up to 100,347 white individuals, up to 12,889 Indian Asian individuals | 19430483 | Nat Genet |
| SBP | established | 15q24.1  | CSK              | rs1378942-C  | 0,6125  | 69,395 European ancestry individuals | Up to 133,361 European ancestry individuals                            | 21909115 | Nature    |
| SBP | established | 4q21.21  | PRDM8 - FGF5     | rs1458038-T  | 0,7057  | 74,064 European ancestry individuals | 48,607 European ancestry individuals                                   | 21909110 | Nat Genet |
| SBP | established | 4q21.21  | PRDM8 - FGF5     | rs1458038-T  | 0,7057  | 69,395 European ancestry individuals | Up to 133,361 European ancestry individuals                            | 21909115 | Nature    |
| SBP | established | 4q21.21  | PRDM8 - FGF5     | rs1458038-T  | 0,7057  | 69,395 European ancestry individuals | Up to 133,361 European ancestry individuals                            | 21909115 | Nature    |
| SBP | established | 12q21.33 | ATP2B1 - MRPL2P1 | rs17249754-G | 0,9282  | 74,064 European ancestry individuals | 48,607 European ancestry individuals                                   | 21909110 | Nat Genet |

|     |             |          |                  |              |         |                                      |                                                                        |          |           |
|-----|-------------|----------|------------------|--------------|---------|--------------------------------------|------------------------------------------------------------------------|----------|-----------|
| SBP | established | 12q21.33 | ATP2B1 - MRPL2P1 | rs17249754-G | 0,9282  | 74,064 European ancestry individuals | 48,607 European ancestry individuals                                   | 21909110 | Nat Genet |
| SBP | established | 1p36.22  | MTHFR            | rs17367504-G | -0,9031 | 74,064 European ancestry individuals | 48,607 European ancestry individuals                                   | 21909110 | Nat Genet |
| SBP | established | 1p36.22  | MTHFR            | rs17367504-G | -0,9031 | 34,433 individuals                   | Up to 100,347 white individuals, up to 12,889 Indian Asian individuals | 19430483 | Nat Genet |
| SBP | established | 17q21.32 | GOSR2            | rs17608766-T | -0,5564 | 74,064 European ancestry individuals | 48,607 European ancestry individuals                                   | 21909110 | Nat Genet |
| SBP | established | 17q21.32 | GOSR2            | rs17608766-T | -0,5564 | 74,064 European ancestry individuals | 48,607 European ancestry individuals                                   | 21909110 | Nat Genet |
| SBP | established | 17q21.32 | GOSR2            | rs17608766-T | -0,5564 | 69,395 European ancestry individuals | Up to 133,361 European ancestry individuals                            | 21909115 | Nature    |
| SBP | established | 6p22.2   | HFE              | rs1799945-G  | 0,627   | 69,395 European ancestry individuals | Up to 133,361 European ancestry individuals                            | 21909115 | Nature    |
| SBP | established | 6p22.2   | HFE              | rs1799945-G  | 0,627   | 69,395 European ancestry individuals | Up to 133,361 European ancestry individuals                            | 21909115 | Nature    |
| SBP | established | 6p22.2   | HFE              | rs1799945-G  | 0,627   | 69,395 European ancestry individuals | Up to 133,361 European ancestry individuals                            | 21909115 | Nature    |
| SBP | established | 10p12.31 | CACN2B           | rs1813353-T  | 0,5686  | 69,395 European ancestry individuals | Up to 133,361 European ancestry individuals                            | 21909115 | Nature    |
| SBP | established | 15q26.1  | FES              | rs2521501-T  | 0,6498  | 74,064 European ancestry individuals | 48,607 European ancestry individuals                                   | 21909110 | Nat Genet |
| SBP | established | 15q26.1  | FES              | rs2521501-T  | 0,6498  | 69,395 European ancestry individuals | Up to 133,361 European ancestry individuals                            | 21909115 | Nature    |
| SBP | established | 15q26.1  | FES              | rs2521501-T  | 0,6498  | 69,395 European ancestry individuals | Up to 133,361 European ancestry individuals                            | 21909115 | Nature    |
| SBP | established | 15q26.1  | FES              | rs2521501-T  | 0,6498  | 69,395 European ancestry individuals | Up to 133,361 European ancestry individuals                            | 21909115 | Nature    |
| SBP | established | 12q21.33 | ATP2B1           | rs2681492-T  | 0,1     | 29,136 individuals                   | 34,433 individuals                                                     | 19430479 | Nat Genet |
| SBP | established | 1p13.2   | MOV10            | rs2932538-G  | 0,3884  | 74,064 European ancestry individuals | 48,607 European ancestry individuals                                   | 21909110 | Nat Genet |
| SBP | established | 1p13.2   | MOV10            | rs2932538-G  | 0,3884  | 69,395 European ancestry individuals | Up to 133,361 European ancestry individuals                            | 21909115 | Nature    |
| SBP | established | 1p13.2   | MOV10            | rs2932538-G  | 0,3884  | 69,395 European ancestry individuals | Up to 133,361 European ancestry individuals                            | 21909115 | Nature    |
| SBP | established | 1p13.2   | MOV10            | rs2932538-G  | 0,3884  | 69,395 European                      | Up to 133,361 European                                                 | 21909115 | Nature    |

|     |             |          |                   |             |         |                                      |                                             |          |           |
|-----|-------------|----------|-------------------|-------------|---------|--------------------------------------|---------------------------------------------|----------|-----------|
|     |             |          |                   | G           |         | ancestry individuals                 | ancestry individuals                        |          |           |
| SBP | established | 12q24.12 | SH2B3             | rs3184504-T | 0,1     | 69,395 European ancestry individuals | Up to 133,361 European ancestry individuals | 21909115 | Nature    |
| SBP | established | 12q24.12 | SH2B3             | rs3184504-T | 0,1     | 29,136 individuals                   | 34,433 individuals                          | 19430479 | Nat Genet |
| SBP | established | 12q24.12 | SH2B3             | rs3184504-T | 0,1     | 29,136 individuals                   | 34,433 individuals                          | 19430479 | Nat Genet |
| SBP | established | 11p15.1  | PLEKHA7           | rs381815-T  | 0,1     | 74,064 European ancestry individuals | 48,607 European ancestry individuals        | 21909110 | Nat Genet |
| SBP | established | 11p15.1  | PLEKHA7           | rs381815-T  | 0,1     | 74,064 European ancestry individuals | 48,607 European ancestry individuals        | 21909110 | Nat Genet |
| SBP | established | 11p15.1  | PLEKHA7           | rs381815-T  | 0,1     | 29,136 individuals                   | 34,433 individuals                          | 19430479 | Nat Genet |
| SBP | established | 3q26.2   | MECOM             | rs419076-T  | 0,4088  | 74,064 European ancestry individuals | 48,607 European ancestry individuals        | 21909110 | Nat Genet |
| SBP | established | 3q26.2   | MECOM             | rs419076-T  | 0,4088  | 69,395 European ancestry individuals | Up to 133,361 European ancestry individuals | 21909115 | Nature    |
| SBP | established | 3q26.2   | MECOM             | rs419076-T  | 0,4088  | 69,395 European ancestry individuals | Up to 133,361 European ancestry individuals | 21909115 | Nature    |
| SBP | established | 10p12.33 | SLC39A12 - CACNB2 | rs4373814-G | -0,3726 | 69,395 European ancestry individuals | Up to 133,361 European ancestry individuals | 21909115 | Nature    |
| SBP | established | 10p12.33 | SLC39A12 - CACNB2 | rs4373814-G | -0,3726 | 69,395 European ancestry individuals | Up to 133,361 European ancestry individuals | 21909115 | Nature    |
| SBP | established | 10p12.33 | SLC39A12 - CACNB2 | rs4373814-G | -0,3726 | 69,395 European ancestry individuals | Up to 133,361 European ancestry individuals | 21909115 | Nature    |
| SBP | established | 3q26.2   | MECOM             | rs448378-A  | -0,1    | 29,136 individuals                   | 34,433 individuals                          | 19430479 | Nat Genet |
| SBP | established | 10q21.2  | C10orf107         | rs4590817-G | 0,6457  | 74,064 European ancestry individuals | 48,607 European ancestry individuals        | 21909110 | Nat Genet |
| SBP | established | 11q22.1  | ARHGAP42          | rs633185-G  | -0,5647 | 74,064 European ancestry individuals | 48,607 European ancestry individuals        | 21909110 | Nat Genet |
| SBP | established | 11q22.1  | ARHGAP42          | rs633185-G  | -0,5647 | 69,395 European ancestry individuals | Up to 133,361 European ancestry individuals | 21909115 | Nature    |
| SBP | established | 11q22.1  | ARHGAP42          | rs633185-G  | -0,5647 | 69,395 European ancestry individuals | Up to 133,361 European ancestry individuals | 21909115 | Nature    |
| SBP | established | 11q22.1  | ARHGAP42          | rs633185-G  | -0,5647 | 69,395 European ancestry individuals | Up to 133,361 European ancestry individuals | 21909115 | Nature    |
| SBP | established | 11p15.4  | ADM - AMPD3       | rs7129220-G | -0,6186 | 74,064 European ancestry individuals | 48,607 European ancestry individuals        | 21909110 | Nat Genet |

|         |             |          |                      |             |         |                                            |                                             |          |               |
|---------|-------------|----------|----------------------|-------------|---------|--------------------------------------------|---------------------------------------------|----------|---------------|
| SBP     | established | 11p15.4  | ADM - AMPD3          | rs7129220-G | -0,6186 | 69,395 European ancestry individuals       | Up to 133,361 European ancestry individuals | 21909115 | Nature        |
| SBP     | established | 11p15.4  | ADM - AMPD3          | rs7129220-G | -0,6186 | 69,395 European ancestry individuals       | Up to 133,361 European ancestry individuals | 21909115 | Nature        |
| SBP     | established | 6p21.33  | BAG6                 | rs805303-G  | 0,3756  | 69,395 European ancestry individuals       | Up to 133,361 European ancestry individuals | 21909115 | Nature        |
| SBP     | established | 6p21.33  | BAG6                 | rs805303-G  | 0,3756  | 69,395 European ancestry individuals       | Up to 133,361 European ancestry individuals | 21909115 | Nature        |
| SBP     | established | 6p21.33  | BAG6                 | rs805303-G  | 0,3756  | 69,395 European ancestry individuals       | Up to 133,361 European ancestry individuals | 21909115 | Nature        |
| SBP     | established | 10q23.33 | PLCE1                | rs932764-G  | 0,4837  | 69,395 European ancestry individuals       | Up to 133,361 European ancestry individuals | 21909115 | Nature        |
| SBP     | established | 10q23.33 | PLCE1                | rs932764-G  | 0,4837  | 69,395 European ancestry individuals       | Up to 133,361 European ancestry individuals | 21909115 | Nature        |
| SBP     | established | 10q23.33 | PLCE1                | rs932764-G  | 0,4837  | 69,395 European ancestry individuals       | Up to 133,361 European ancestry individuals | 21909115 | Nature        |
| smoking | established | 15q25.1  | CHRNA3               | rs1051730-T | 0,1     | 31,266 European ancestry individuals       | 54,731 European descent individuals         | 20418888 | Nat Genet     |
| smoking | established | 15q25.1  | CHRNA3               | rs1051730-T | 0,1     | 41,150 European descent individuals        | 120,516 European descent individuals        | 20418889 | Nat Genet     |
| smoking | established | 15q25.1  | CHRNA3               | rs1051730-T | 0,1     | Up to 74,035 European ancestry individuals | Up to 68,988 participants                   | 20418890 | Nat Genet     |
| smoking | established | 15q25.1  | CHRNA3               | rs1051730-T | 0,1     | 10,995 smokers                             | 4,848 smokers                               | 18385739 | Nature        |
| smoking | established | 10q23.32 | RPS27P1 - PPP1R3C    | rs1329650-T | 0,37    | Up to 74,035 European ancestry individuals | Up to 68,988 participants                   | 20418890 | Nat Genet     |
| smoking | established | 7p14.3   | PDE1C - SLC25A5P5    | rs215614-G  | 0,22    | 31,266 European ancestry individuals       | 54,731 European descent individuals         | 20418888 | Nat Genet     |
| smoking | established | 21q22.2  | FLJ45139 - RPL23AP12 | rs2836823-T | 0,38    | 1,050 cases,879 controls                   | NR                                          | 17158188 | Hum Mol Genet |
| smoking | established | 9q34.2   | FAM163B - DBH        | rs3025343-G | 0,113   | Up to 74,035 European ancestry individuals | Up to 68,988 participants                   | 20418890 | Nat Genet     |
| smoking | established | 19q13.2  | EGLN2                | rs3733829-G | 0,33    | Up to 74,035 European ancestry individuals | Up to 68,988 participants                   | 20418890 | Nat Genet     |
| smoking | established | 19q13.2  | CYP2A6 - CYP2A7      | rs4105144-C | 0,39    | 31,266 European ancestry individuals       | 54,731 European descent individuals         | 20418888 | Nat Genet     |
| smoking | established | 10q21.3  | CTNNA3               | rs4142041-G | 0,13    | 1,050 cases,879 controls                   | NR                                          | 17158188 | Hum Mol Genet |

|         |             |          |                 |              |             |                                            |                                              |          |            |
|---------|-------------|----------|-----------------|--------------|-------------|--------------------------------------------|----------------------------------------------|----------|------------|
| smoking | established | 11p14.1  | BDNF            | rs6265-G     | 0,058       | Up to 74,035 European ancestry individuals | Up to 68,988 participants                    | 20418890 | Nat Genet  |
| smoking | established | 8p11.21  | C8orf40 - CHRN3 | rs6474412-T  | 0,29        | 31,266 European ancestry individuals       | 54,731 European descent individuals          | 20418888 | Nat Genet  |
| smoking | established | 19q13.2  | CYP2B6          | rs7260329-G  | 0,2         | 31,266 European ancestry individuals       | 54,731 European descent individuals          | 20418888 | Nat Genet  |
| T1D     | established | 11p15.5  | IGF2;INS-IGF2   | rs1004446-C  | 0,476234179 | 467 trios, 561 cases, 1,143 controls       | 2,350 individuals in 549 families; 390 trios | 17632545 | Nature     |
| T1D     | established | 11p15.5  | IGF2;INS-IGF2   | rs1004446-C  | 0,476234179 | 12,501 European ancestry cases             | 3,598 affected siblings                      | 21829393 | PLoS Genet |
| T1D     | established | 4p15.2   | C4orf52 - RBPJ  | rs10517086-A | 0,086177696 | 7,514 cases, 9,045 controls                | 4,267 cases, 4,670 controls, 4,342 trios     | 19430480 | Nat Genet  |
| T1D     | established | 12p13.31 | -               | rs11052552-G | 0,39877612  | 1,963 cases, 2,938 controls                | (see Todd 2007)                              | 17554300 | Nature     |
| T1D     | established | 12q13.2  | RPS26 - ERBB3   | rs11171739-C | 0,292669614 | 1,963 cases, 2,938 controls                | (see Todd 2007)                              | 17554300 | Nature     |
| T1D     | established | 6q15     | BACH2           | rs11755527-G | 0,122217633 | 7,514 cases, 9,045 controls                | 4,267 cases, 4,670 controls, 4,342 trios     | 19430480 | Nat Genet  |
| T1D     | established | 6q15     | BACH2           | rs11755527-G | 0,122217633 | 3,561 cases, 4,646 controls                | 6,225 cases, 6,946 controls, 3,064 trios     | 18978792 | Nat Genet  |
| T1D     | established | 6q15     | BACH2           | rs11755527-G | 0,122217633 | 12,501 European ancestry cases             | 3,598 affected siblings                      | 21829393 | PLoS Genet |
| T1D     | established | 16p12.3  | GP2 - UMOD      | rs12444268-A | 0,09531018  | 7,514 cases, 9,045 controls                | 4,267 cases, 4,670 controls, 4,342 trios     | 19430480 | Nat Genet  |
| T1D     | established | 16p13.13 | CLEC16A         | rs12708716-A | 0,207014169 | 7,514 cases, 9,045 controls                | 4,267 cases, 4,670 controls, 4,342 trios     | 19430480 | Nat Genet  |
| T1D     | established | 16p13.13 | CLEC16A         | rs12708716-A | 0,207014169 | 1,963 cases, 2,938 controls                | (see Todd 2007)                              | 17554300 | Nature     |
| T1D     | established | 16p13.13 | CLEC16A         | rs12708716-A | 0,207014169 | 1,963 cases, 2,938 controls                | 2997 trios, 4,000 cases, 5,000 controls      | 17554260 | Nat Genet  |
| T1D     | established | 16p13.13 | CLEC16A         | rs12708716-A | 0,207014169 | 3,561 cases, 4,646 controls                | 6,225 cases, 6,946 controls, 3,064 trios     | 18978792 | Nat Genet  |
| T1D     | established | 16p13.13 | CLEC16A         | rs12708716-A | 0,207014169 | 12,501 European ancestry cases             | 3,598 affected siblings                      | 21829393 | PLoS Genet |
| T1D     | established | 5p13.2   | CAPSL           | rs1445898-G  | 0,113328685 | 1,963 cases, 2,938 controls                | 2997 trios, 4,000 cases, 5,000 controls      | 17554260 | Nat Genet  |
| T1D     | established | 2p24.3   | ST13P1 - TRIB2  | rs1534422-G  | 0,076961041 | 7,514 cases, 9,045 controls                | 4,267 cases, 4,670 controls, 4,342 trios     | 19430480 | Nat Genet  |

|     |             |          |                   |              |             |                                      |                                          |          |            |
|-----|-------------|----------|-------------------|--------------|-------------|--------------------------------------|------------------------------------------|----------|------------|
| T1D | established | 12q13.2  | SUOX - IKZF4      | rs1701704-C  | 0,223143551 | 467 trios, 561 cases, 1,143 controls | 549 families, 364 trios                  | 18198356 | Diabetes   |
| T1D | established | 12q13.2  | SUOX - IKZF4      | rs1701704-C  | 0,223143551 | 12,501 European ancestry cases       | 3,598 affected siblings                  | 21829393 | PLoS Genet |
| T1D | established | 5q31.1   | FSTL4             | rs17166496-G | 0,262364264 | 1,963 cases,2,938 controls           | (see Todd 2007)                          | 17554300 | Nature     |
| T1D | established | 4q27     | ADAD1             | rs17388568-A | 0,231111721 | 1,963 cases,2,938 controls           | (see Todd 2007)                          | 17554300 | Nature     |
| T1D | established | 4q27     | ADAD1             | rs17388568-A | 0,231111721 | 12,501 European ancestry cases       | 3,598 affected siblings                  | 21829393 | PLoS Genet |
| T1D | established | 12q24.13 | NAA25             | rs17696736-G | 0,292669614 | 3,561 cases,4,646 controls           | 6,225 cases,6,946 controls, 3,064 trios  | 18978792 | Nat Genet  |
| T1D | established | 12q24.13 | NAA25             | rs17696736-G | 0,292669614 | 1,963 cases,2,938 controls           | (see Todd 2007)                          | 17554300 | Nature     |
| T1D | established | 12q24.13 | NAA25             | rs17696736-G | 0,292669614 | 1,963 cases,2,938 controls           | 2997 trios, 4,000 cases, 5,000 controls  | 17554260 | Nat Genet  |
| T1D | established | 2q24.2   | IFIH1             | rs1990760-A  | 0,165514438 | 7,514 cases, 9,045 controls          | 4,267 cases, 4,670 controls, 4,342 trios | 19430480 | Nat Genet  |
| T1D | established | 2q24.2   | IFIH1             | rs1990760-A  | 0,165514438 | 1,963 cases,2,938 controls           | 2997 trios, 4,000 cases, 5,000 controls  | 17554260 | Nat Genet  |
| T1D | established | 2q24.2   | IFIH1             | rs1990760-A  | 0,165514438 | 12,501 European ancestry cases       | 3,598 affected siblings                  | 21829393 | PLoS Genet |
| T1D | established | 2p23.3   | RPL36AP13 - NCOA1 | rs2165738-C  | 0,067658648 | 3,561 cases,4,646 controls           | 6,225 cases,6,946 controls, 3,064 trios  | 18978792 | Nat Genet  |
| T1D | established | 1p31.3   | PGM1              | rs2269241-G  | 0,09531018  | 7,514 cases, 9,045 controls          | 4,267 cases, 4,670 controls, 4,342 trios | 19430480 | Nat Genet  |
| T1D | established | 12q13.2  | ERBB3             | rs2292239-A  | 0,246860078 | 7,514 cases, 9,045 controls          | 4,267 cases, 4,670 controls, 4,342 trios | 19430480 | Nat Genet  |
| T1D | established | 12q13.2  | ERBB3             | rs2292239-A  | 0,246860078 | 3,561 cases,4,646 controls           | 6,225 cases,6,946 controls, 3,064 trios  | 18978792 | Nat Genet  |
| T1D | established | 12q13.2  | ERBB3             | rs2292239-A  | 0,246860078 | 1,963 cases,2,938 controls           | 2997 trios, 4,000 cases, 5,000 controls  | 17554260 | Nat Genet  |
| T1D | established | 12q13.2  | ERBB3             | rs2292239-A  | 0,246860078 | 12,501 European ancestry cases       | 3,598 affected siblings                  | 21829393 | PLoS Genet |
| T1D | established | 22q12.3  | C1QTNF6 - SSTR3   | rs229541-T   | 0,104360015 | 7,514 cases, 9,045 controls          | 4,267 cases, 4,670 controls, 4,342 trios | 19430480 | Nat Genet  |
| T1D | established | 22q12.3  | C1QTNF6 - SSTR3   | rs229541-T   | 0,104360015 | 3,561 cases,4,646 controls           | 6,225 cases,6,946 controls, 3,064 trios  | 18978792 | Nat Genet  |

|     |             |          |                     |             |             |                                                                 |                                                                                                          |          |            |
|-----|-------------|----------|---------------------|-------------|-------------|-----------------------------------------------------------------|----------------------------------------------------------------------------------------------------------|----------|------------|
| T1D | established | 19p13.2  | TYK2                | rs2304256-C | 0,148420005 | 12,501 European ancestry cases                                  | 3,598 affected siblings                                                                                  | 21829393 | PLoS Genet |
| T1D | established | 19p13.2  | TYK2                | rs2304256-C | 0,148420005 | 7,514 European ancestry cases, 9,045 European ancestry controls | 4,840 European ancestry cases, 2,670 European ancestry controls, 4,152 European ancestry familial triads | 19966805 | Nat Genet  |
| T1D | established | 1p13.2   | PTPN22              | rs2476601-T | 0,683096845 | 7,514 cases, 9,045 controls                                     | 4,267 cases, 4,670 controls, 4,342 trios                                                                 | 19430480 | Nat Genet  |
| T1D | established | 1p13.2   | PTPN22              | rs2476601-T | 0,683096845 | 467 trios, 561 cases, 1,143 controls                            | 2,350 individuals in 549 families; 390 trios                                                             | 17632545 | Nature     |
| T1D | established | 1p13.2   | PTPN22              | rs2476601-T | 0,683096845 | 12,501 European ancestry cases                                  | 3,598 affected siblings                                                                                  | 21829393 | PLoS Genet |
| T1D | established | 1p13.2   | PTPN22              | rs2476601-T | 0,683096845 | 1,963 cases, 2,938 controls                                     | 2997 trios, 4,000 cases, 5,000 controls                                                                  | 17554260 | Nat Genet  |
| T1D | established | 18p11.21 | PSMG2 - PTPN2       | rs2542151-C | 0,262364264 | 3,561 cases, 4,646 controls                                     | 6,225 cases, 6,946 controls, 3,064 trios                                                                 | 18978792 | Nat Genet  |
| T1D | established | 18p11.21 | PSMG2 - PTPN2       | rs2542151-C | 0,262364264 | 1,963 cases, 2,938 controls                                     | 2997 trios, 4,000 cases, 5,000 controls                                                                  | 17554260 | Nat Genet  |
| T1D | established | 18p11.21 | PSMG2 - PTPN2       | rs2542151-C | 0,262364264 | 12,501 European ancestry cases                                  | 3,598 affected siblings                                                                                  | 21829393 | PLoS Genet |
| T1D | established | 6p21.32  | HLA-DQB1 - HLA-DQA2 | rs2647044-A | 2,116255515 | 467 trios, 561 cases, 1,143 controls                            | 2,350 individuals in 549 families; 390 trios                                                             | 17632545 | Nature     |
| T1D | established | Xq28     | GAB3                | rs2664170-G | 0,148420005 | 7,514 cases, 9,045 controls                                     | 4,267 cases, 4,670 controls, 4,342 trios                                                                 | 19430480 | Nat Genet  |
| T1D | established | 16p13.13 | CLEC16A             | rs2903692-G | 0,431782416 | 467 trios, 561 cases, 1,143 controls                            | 2,350 individuals in 549 families; 390 trios                                                             | 17632545 | Nature     |
| T1D | established | 11p15.5  | IGF2;INS-IGF2       | rs3741208-T | 0,223143551 | 1,963 cases, 2,938 controls                                     | 2997 trios, 4,000 cases, 5,000 controls                                                                  | 17554260 | Nat Genet  |
| T1D | established | 12p13.31 | CLEC2D              | rs3764021-C | 0,451075619 | 1,963 cases, 2,938 controls                                     | (see Todd 2007)                                                                                          | 17554300 | Nature     |
| T1D | established | 15q25.1  | CTSH                | rs3825932-T | 0,148420005 | 7,514 cases, 9,045 controls                                     | 4,267 cases, 4,670 controls, 4,342 trios                                                                 | 19430480 | Nat Genet  |
| T1D | established | 15q25.1  | CTSH                | rs3825932-T | 0,148420005 | 3,561 cases, 4,646 controls                                     | 6,225 cases, 6,946 controls, 3,064 trios                                                                 | 18978792 | Nat Genet  |
| T1D | established | 16p13.13 | TNP2                | rs416603-T  | 0,058268908 | 3,561 cases, 4,646 controls                                     | 6,225 cases, 6,946 controls, 3,064 trios                                                                 | 18978792 | Nat Genet  |
| T1D | established | 12p13.31 | CD69                | rs4763879-  | 0,086177696 | 7,514 cases, 9,045                                              | 4,267 cases, 4,670                                                                                       | 19430480 | Nat Genet  |

|     |             |         |                      |             |             |                                                                 |                                                                                                          |          |            |
|-----|-------------|---------|----------------------|-------------|-------------|-----------------------------------------------------------------|----------------------------------------------------------------------------------------------------------|----------|------------|
|     |             |         |                      | A           |             | controls                                                        | controls, 4,342 trios                                                                                    |          |            |
| T1D | established | 16p11.2 | IL27 - NUPR1         | rs4788084-G | 0,086177696 | 12,501 European ancestry cases                                  | 3,598 affected siblings                                                                                  | 21829393 | PLoS Genet |
| T1D | established | 16p11.2 | IL27 - NUPR1         | rs4788084-G | 0,086177696 | 7,514 cases, 9,045 controls                                     | 4,267 cases, 4,670 controls, 4,342 trios                                                                 | 19430480 | Nat Genet  |
| T1D | established | 14q32.2 | C14orf64 - C14orf177 | rs4900384-G | 0,086177696 | 7,514 cases, 9,045 controls                                     | 4,267 cases, 4,670 controls, 4,342 trios                                                                 | 19430480 | Nat Genet  |
| T1D | established | 22q12.2 | RPS3AP51 - LIF       | rs5753037-T | 0,09531018  | 7,514 cases, 9,045 controls                                     | 4,267 cases, 4,670 controls, 4,342 trios                                                                 | 19430480 | Nat Genet  |
| T1D | established | 4q27    | KIAA1109             | rs6534347-A | 0,262364264 | 1,963 cases, 2,938 controls                                     | (see Todd 2007)                                                                                          | 17554300 | Nature     |
| T1D | established | 1p13.2  | RPS2P14 - RSBN1      | rs6679677-A | 0,636576829 | 3,561 cases, 4,646 controls                                     | 6,225 cases, 6,946 controls, 3,064 trios                                                                 | 18978792 | Nat Genet  |
| T1D | established | 1p13.2  | RPS2P14 - RSBN1      | rs6679677-A | 0,636576829 | 1,963 cases, 2,938 controls                                     | (see Todd 2007)                                                                                          | 17554300 | Nature     |
| T1D | established | 1p13.2  | RPS2P14 - RSBN1      | rs6679677-A | 0,636576829 | 1,963 cases, 2,938 controls                                     | 2997 trios, 4,000 cases, 5,000 controls                                                                  | 17554260 | Nat Genet  |
| T1D | established | 5p13.2  | IL7R                 | rs6897932-G | 0,113328685 | 1,963 cases, 2,938 controls                                     | 2997 trios, 4,000 cases, 5,000 controls                                                                  | 17554260 | Nat Genet  |
| T1D | established | 16q23.1 | CTRB2 - CTRB1        | rs7202877-G | 0,246860078 | 7,514 cases, 9,045 controls                                     | 4,267 cases, 4,670 controls, 4,342 trios                                                                 | 19430480 | Nat Genet  |
| T1D | established | 18q22.2 | CD226                | rs763361-A  | 0,148420005 | 1,963 cases, 2,938 controls                                     | 2997 trios, 4,000 cases, 5,000 controls                                                                  | 17554260 | Nat Genet  |
| T1D | established | 18q22.2 | CD226                | rs763361-A  | 0,148420005 | 12,501 European ancestry cases                                  | 3,598 affected siblings                                                                                  | 21829393 | PLoS Genet |
| T1D | established | 6p21.32 | HLA-DQA1             | rs9272346-G | 1,702928256 | 3,561 cases, 4,646 controls                                     | 6,225 cases, 6,946 controls, 3,064 trios                                                                 | 18978792 | Nat Genet  |
| T1D | established | 6p21.32 | HLA-DQA1             | rs9272346-G | 1,702928256 | 1,963 cases, 2,938 controls                                     | (see Todd 2007)                                                                                          | 17554300 | Nature     |
| T1D | established | 6q22.32 | CENPW - RPS4XP9      | rs9388489-G | 0,157003749 | 7,514 cases, 9,045 controls                                     | 4,267 cases, 4,670 controls, 4,342 trios                                                                 | 19430480 | Nat Genet  |
| T1D | established | 14q32.2 | MEG3                 | rs941576-A  | 0,104360015 | 7,514 European ancestry cases, 9,045 European ancestry controls | 4,840 European ancestry cases, 2,670 European ancestry controls, 4,152 European ancestry familial triads | 19966805 | Nat Genet  |
| T1D | established | 10p15.1 | DKFZp667F0711        | rs947474-G  | 0,09531018  | 3,561 cases, 4,646 controls                                     | 6,225 cases, 6,946 controls, 3,064 trios                                                                 | 18978792 | Nat Genet  |



|     |             |          |                  |              |             |                                                                  |                                                                                |          |           |
|-----|-------------|----------|------------------|--------------|-------------|------------------------------------------------------------------|--------------------------------------------------------------------------------|----------|-----------|
| T1D | established | 2q11.2   | AFF3 - LONRF2    | rs9653442-G  | 0,104360015 | 1,963 cases,2,938 controls                                       | 2997 trios, 4,000 cases, 5,000 controls                                        | 17554260 | Nat Genet |
| T2D | established | 6p22.3   | CDKAL1           | rs10440833-A | 0,223143551 | 8,130 European ancestry cases, 38,987 European ancestry controls | Up to 34,412 European ancestry cases, 59,925 European ancestry controls        | 20581827 | Nat Genet |
| T2D | established | 9p21.3   | UBA52P6 - DMRTA1 | rs10811661-T | 0,182321557 | 1,924 cases, 2,938 controls                                      | 3,757 cases, 5,346 controls                                                    | 19056611 | Diabetes  |
| T2D | established | 9p21.3   | UBA52P6 - DMRTA1 | rs10811661-T | 0,182321557 | 1,464 cases,1,467 controls                                       | 5,065 cases,5,785 controls (also includes meta-analysis from DGI+FUSION+WTCCC) | 17463246 | Science   |
| T2D | established | 9p21.3   | UBA52P6 - DMRTA1 | rs10811661-T | 0,182321557 | 1,161 cases,1,174 controls                                       | 1,215 cases,1,258 controls (also includes meta-analysis from DGI+FUSION+WTCCC) | 17463248 | Science   |
| T2D | established | 9p21.3   | UBA52P6 - DMRTA1 | rs10811661-T | 0,182321557 | 1,924 cases,2,938 controls                                       | 3,757 cases,5,346 controls (also includes meta-analysis from DGI+FUSION+WTCCC) | 17463249 | Science   |
| T2D | established | 1p12     | NOTCH2           | rs10923931-T | 0,122217633 | 4,549 cases,5,579 controls                                       | 24,194 cases,55,598 controls                                                   | 18372903 | Nat Genet |
| T2D | established | 6p22.3   | CDKAL1           | rs10946398-C | 0,148420005 | 1,924 cases, 2,938 controls                                      | 3,757 cases, 5,346 controls                                                    | 19056611 | Diabetes  |
| T2D | established | 6p22.3   | CDKAL1           | rs10946398-C | 0,148420005 | 1,924 cases,2,938 controls                                       | 3,757 cases,5,346 controls (also includes meta-analysis from DGI+FUSION+WTCCC) | 17463249 | Science   |
| T2D | established | 9p21.3   | UBA52P6 - DMRTA1 | rs10965250-G | 0,182321557 | 8,130 European ancestry cases, 38,987 European ancestry controls | Up to 34,412 European ancestry cases, 59,925 European ancestry controls        | 20581827 | Nat Genet |
| T2D | established | 10q23.33 | HHEX - EXOC6     | rs1111875-C  | 0,122217633 | 1,464 cases,1,467 controls                                       | 5,065 cases,5,785 controls (also includes meta-analysis from DGI+FUSION+WTCCC) | 17463246 | Science   |
| T2D | established | 10q23.33 | HHEX - EXOC6     | rs1111875-C  | 0,122217633 | 1,161 cases,1,174 controls                                       | 1,215 cases,1,258 controls (also includes meta-                                | 17463248 | Science   |

|     |             |          |                    |                  |             |                                                                           |                                                                                          |          |           |
|-----|-------------|----------|--------------------|------------------|-------------|---------------------------------------------------------------------------|------------------------------------------------------------------------------------------|----------|-----------|
|     |             |          |                    |                  |             |                                                                           | analysis from<br>DGI+FUSION+WTCCC)                                                       |          |           |
| T2D | established | 10q23.33 | HHEX - EXOC6       | rs1111875-<br>C  | 0,122217633 | 661 cases,614 controls                                                    | 2,617 cases,2,894 controls                                                               | 17293876 | Nature    |
| T2D | established | 12q13.2  | DCD - VDAC1P5      | rs1153188-<br>A  | 0,076961041 | 4,549 cases,5,579<br>controls                                             | 24,194 cases,55,598<br>controls                                                          | 18372903 | Nat Genet |
| T2D | established | 15q25.1  | ZFAND6 - FAH       | rs11634397-<br>G | 0,058268908 | 8,130 European<br>ancestry cases, 38,987<br>European ancestry<br>controls | Up to 34,412 European<br>ancestry cases, 59,925<br>European ancestry<br>controls         | 20581827 | Nat Genet |
| T2D | established | 16q12.2  | FTO                | rs11642841-<br>A | 0,122217633 | 8,130 European<br>ancestry cases, 38,987<br>European ancestry<br>controls | Up to 34,412 European<br>ancestry cases, 59,925<br>European ancestry<br>controls         | 20581827 | Nat Genet |
| T2D | established | 12q13.12 | HIGD1C             | rs12304921-<br>G | 0,916290732 | 1,924 cases,2,938<br>controls                                             | (see Zeggini 2007)                                                                       | 17554300 | Nature    |
| T2D | established | 5q14.3   | MEF2C - CETN3      | rs12518099-<br>C | 0,148420005 | 679 French cases, 697<br>French controls                                  | 5,579 European cases,<br>7,096 European controls                                         | 19734900 | Nat Genet |
| T2D | established | 10p13    | CDC123 -<br>CAMK1D | rs12779790-<br>G | 0,104360015 | 4,549 cases,5,579<br>controls                                             | 24,194 cases,55,598<br>controls                                                          | 18372903 | Nat Genet |
| T2D | established | 3p25.2   | TIMP4 -<br>GSTM5P1 | rs13081389-<br>A | 0,21511138  | 8,130 European<br>ancestry cases, 38,987<br>European ancestry<br>controls | Up to 34,412 European<br>ancestry cases, 59,925<br>European ancestry<br>controls         | 20581827 | Nat Genet |
| T2D | established | 8q24.11  | SLC30A8            | rs13266634-<br>C | 0,148420005 | 1,924 cases, 2,938<br>controls                                            | 3,757 cases, 5,346 controls                                                              | 19056611 | Diabetes  |
| T2D | established | 8q24.11  | SLC30A8            | rs13266634-<br>C | 0,148420005 | 1,464 cases,1,467<br>controls                                             | 5,065 cases,5,785 controls<br>(also includes meta-<br>analysis from<br>DGI+FUSION+WTCCC) | 17463246 | Science   |
| T2D | established | 8q24.11  | SLC30A8            | rs13266634-<br>C | 0,148420005 | 1,161 cases,1,174<br>controls                                             | 1,215 cases,1,258 controls<br>(also includes meta-<br>analysis from<br>DGI+FUSION+WTCCC) | 17463248 | Science   |
| T2D | established | 8q24.11  | SLC30A8            | rs13266634-<br>C | 0,148420005 | 1,399 EA cases,5,275<br>EA controls                                       | 2,437 EA cases,7,287 EA<br>controls                                                      | 17460697 | Nat Genet |
| T2D | established | 8q24.11  | SLC30A8            | rs13266634-<br>C | 0,148420005 | 1,924 cases,2,938<br>controls                                             | 3,757 cases,5,346 controls<br>(also includes meta-                                       | 17463249 | Science   |

|     |             |         |                        |                  |             |                                                                           |                                                                                          |          |           |
|-----|-------------|---------|------------------------|------------------|-------------|---------------------------------------------------------------------------|------------------------------------------------------------------------------------------|----------|-----------|
|     |             |         |                        |                  |             |                                                                           | analysis from<br>DGI+FUSION+WTCCC)                                                       |          |           |
| T2D | established | 8q24.11 | SLC30A8                | rs13266634-<br>C | 0,148420005 | 661 cases,614 controls                                                    | 2,617 cases,2,894 controls                                                               | 17293876 | Nature    |
| T2D | established | 8q24.11 | SLC30A8                | rs13266634-<br>C | 0,148420005 | 679 French cases, 697<br>French controls                                  | 5,579 European cases,<br>7,096 European controls                                         | 19734900 | Nat Genet |
| T2D | established | 9q21.31 | KRT18P24 -<br>CHCHD2P9 | rs13292136-<br>C | 0,104360015 | 8,130 European<br>ancestry cases, 38,987<br>European ancestry<br>controls | Up to 34,412 European<br>ancestry cases, 59,925<br>European ancestry controls            | 20581827 | Nat Genet |
| T2D | established | 11q14.3 | RPS3AP42 -<br>MTNR1B   | rs1387153-<br>T  | 0,086177696 | 8,130 European<br>ancestry cases, 38,987<br>European ancestry<br>controls | Up to 34,412 European<br>ancestry cases, 59,925<br>European ancestry controls            | 20581827 | Nat Genet |
| T2D | established | 3q27.2  | IGF2BP2                | rs1470579-<br>C  | 0,131028262 | 8,130 European<br>ancestry cases, 38,987<br>European ancestry<br>controls | Up to 34,412 European<br>ancestry cases, 59,925<br>European ancestry controls            | 20581827 | Nat Genet |
| T2D | established | 12q21.1 | TSPAN8 - LGR5          | rs1495377-<br>G  | 0,246860078 | 1,924 cases,2,938<br>controls                                             | (see Zeggini 2007)                                                                       | 17554300 | Nature    |
| T2D | established | 12q14.3 | RPSAP52                | rs1531343-<br>C  | 0,09531018  | 8,130 European<br>ancestry cases, 38,987<br>European ancestry<br>controls | Up to 34,412 European<br>ancestry cases, 59,925<br>European ancestry controls            | 20581827 | Nat Genet |
| T2D | established | 11q13.4 | ARAP1                  | rs1552224-<br>A  | 0,131028262 | 8,130 European<br>ancestry cases, 38,987<br>European ancestry<br>controls | Up to 34,412 European<br>ancestry cases, 59,925<br>European ancestry controls            | 20581827 | Nat Genet |
| T2D | established | 3p25.2  | TIMP4 -<br>GSTM5P1     | rs17036101-<br>G | 0,139761942 | 4,549 cases,5,579<br>controls                                             | 24,194 cases,55,598<br>controls                                                          | 18372903 | Nat Genet |
| T2D | established | 4p16.1  | WFS1                   | rs1801214-<br>T  | 0,122217633 | 8,130 European<br>ancestry cases, 38,987<br>European ancestry<br>controls | Up to 34,412 European<br>ancestry cases, 59,925<br>European ancestry controls            | 20581827 | Nat Genet |
| T2D | established | 3p25.2  | PPARG                  | rs1801282-<br>C  | 0,131028262 | 1,464 cases,1,467<br>controls                                             | 5,065 cases,5,785 controls<br>(also includes meta-<br>analysis from<br>DGI+FUSION+WTCCC) | 17463246 | Science   |

|     |             |         |                  |             |             |                                                                                      |                                                                                      |          |            |
|-----|-------------|---------|------------------|-------------|-------------|--------------------------------------------------------------------------------------|--------------------------------------------------------------------------------------|----------|------------|
| T2D | established | 3p25.2  | PPARG            | rs1801282-C | 0,131028262 | 1,161 cases,1,174 controls                                                           | 1,215 cases,1,258 controls (also includes meta-analysis from DGI+FUSION+WTCCC)       | 17463248 | Science    |
| T2D | established | 3p25.2  | PPARG            | rs1801282-C | 0,131028262 | 1,924 cases,2,938 controls                                                           | 3,757 cases,5,346 controls (also includes meta-analysis from DGI+FUSION+WTCCC)       | 17463249 | Science    |
| T2D | established | 11p15.5 | KCNQ1            | rs231362-G  | 0,076961041 | 8,130 European ancestry cases, 38,987 European ancestry controls                     | Up to 34,412 European ancestry cases, 59,925 European ancestry controls              | 20581827 | Nat Genet  |
| T2D | established | 2p16.1  | EIF3FP3 - BCL11A | rs243021-A  | 0,076961041 | 8,130 European ancestry cases, 38,987 European ancestry controls                     | Up to 34,412 European ancestry cases, 59,925 European ancestry controls              | 20581827 | Nat Genet  |
| T2D | established | 2q36.3  | NYAP2 - IRS1     | rs2943641-C | 0,173953307 | 679 French cases, 697 French controls                                                | 5,579 European cases, 7,096 European controls                                        | 19734900 | Nat Genet  |
| T2D | established | 8q24.11 | SLC30A8          | rs3802177-G | 0,139761942 | 2,112 lean type 2 diabetes cases, 4,123 obese type 2 diabetes cases, 54,412 controls | 2,881 lean type 2 diabetes cases, 8,702 obese type 2 diabetes cases, 18,957 controls | 22693455 | PLoS Genet |
| T2D | established | 8q24.11 | SLC30A8          | rs3802177-G | 0,139761942 | 8,130 European ancestry cases, 38,987 European ancestry controls                     | Up to 34,412 European ancestry cases, 59,925 European ancestry controls              | 20581827 | Nat Genet  |
| T2D | established | 3q27.2  | IGF2BP2          | rs4402960-T | 0,157003749 | 2,112 lean type 2 diabetes cases, 4,123 obese type 2 diabetes cases, 54,412 controls | 2,881 lean type 2 diabetes cases, 8,702 obese type 2 diabetes cases, 18,957 controls | 22693455 | PLoS Genet |
| T2D | established | 3q27.2  | IGF2BP2          | rs4402960-T | 0,157003749 | 4,549 cases,5,579 controls                                                           | 24,194 cases,55,598 controls                                                         | 18372903 | Nat Genet  |
| T2D | established | 3q27.2  | IGF2BP2          | rs4402960-T | 0,157003749 | 1,464 cases,1,467 controls                                                           | 5,065 cases,5,785 controls (also includes meta-analysis from DGI+FUSION+WTCCC)       | 17463246 | Science    |
| T2D | established | 3q27.2  | IGF2BP2          | rs4402960-T | 0,157003749 | 1,161 cases,1,174 controls                                                           | 1,215 cases,1,258 controls (also includes meta-                                      | 17463248 | Science    |

|     |             |          |                 |             |             |                                                                                      |                                                                                      |          |            |
|-----|-------------|----------|-----------------|-------------|-------------|--------------------------------------------------------------------------------------|--------------------------------------------------------------------------------------|----------|------------|
|     |             |          |                 |             |             |                                                                                      | analysis from<br>DGI+FUSION+WTCCC)                                                   |          |            |
| T2D | established | 3q27.2   | IGF2BP2         | rs4402960-T | 0,157003749 | 1,924 cases,2,938 controls                                                           | 3,757 cases,5,346 controls (also includes meta-analysis from DGI+FUSION+WTCCC)       | 17463249 | Science    |
| T2D | established | 17q12    | HNF1B           | rs4430796-G | 0,131028262 | 8,130 European ancestry cases, 38,987 European ancestry controls                     | Up to 34,412 European ancestry cases, 59,925 European ancestry controls              | 20581827 | Nat Genet  |
| T2D | established | 5q13.3   | SNORA47 - PDE8B | rs4457053-G | 0,076961041 | 8,130 European ancestry cases, 38,987 European ancestry controls                     | Up to 34,412 European ancestry cases, 59,925 European ancestry controls              | 20581827 | Nat Genet  |
| T2D | established | 10q25.2  | TCF7L2          | rs4506565-T | 0,3074847   | 1,924 cases,2,938 controls                                                           | (see Zeggini 2007)                                                                   | 17554300 | Nature     |
| T2D | established | 3p14.1   | ADAMTS9 - MAGI1 | rs4607103-C | 0,086177696 | 4,549 cases,5,579 controls                                                           | 24,194 cases,55,598 controls                                                         | 18372903 | Nat Genet  |
| T2D | established | 4p16.1   | WFS1            | rs4689388-T | 0,148420005 | 679 French cases, 697 French controls                                                | 5,579 European cases, 7,096 European controls                                        | 19734900 | Nat Genet  |
| T2D | established | 6p22.3   | CDKAL1          | rs4712523-G | 0,182321557 | 679 French cases, 697 French controls                                                | 5,579 European cases, 7,096 European controls                                        | 19734900 | Nat Genet  |
| T2D | established | 12q21.1  | TSPAN8 - LGR5   | rs4760790-A | 0,104360015 | 8,130 European ancestry cases, 38,987 European ancestry controls                     | Up to 34,412 European ancestry cases, 59,925 European ancestry controls              | 20581827 | Nat Genet  |
| T2D | established | 10q23.33 | HHEX - EXOC6    | rs5015480-C | 0,165514438 | 2,112 lean type 2 diabetes cases, 4,123 obese type 2 diabetes cases, 54,412 controls | 2,881 lean type 2 diabetes cases, 8,702 obese type 2 diabetes cases, 18,957 controls | 22693455 | PLoS Genet |
| T2D | established | 10q23.33 | HHEX - EXOC6    | rs5015480-C | 0,165514438 | 8,130 European ancestry cases, 38,987 European ancestry controls                     | Up to 34,412 European ancestry cases, 59,925 European ancestry controls              | 20581827 | Nat Genet  |
| T2D | established | 10q23.33 | HHEX - EXOC6    | rs5015480-C | 0,165514438 | 4,549 cases,5,579 controls                                                           | 24,194 cases,55,598 controls                                                         | 18372903 | Nat Genet  |
| T2D | established | 10q23.33 | HHEX - EXOC6    | rs5015480-C | 0,165514438 | 1,924 cases,2,938 controls                                                           | 3,757 cases,5,346 controls (also includes meta-                                      | 17463249 | Science    |

|     |             |         |                     |                 |             |                                                                           |                                                                                          |          |           |
|-----|-------------|---------|---------------------|-----------------|-------------|---------------------------------------------------------------------------|------------------------------------------------------------------------------------------|----------|-----------|
|     |             |         |                     |                 |             |                                                                           | analysis from<br>DGI+FUSION+WTCCC)                                                       |          |           |
| T2D | established | 11p15.1 | KCNJ11              | rs5215-C        | 0,148420005 | 4,549 cases,5,579<br>controls                                             | 24,194 cases,55,598<br>controls                                                          | 18372903 | Nat Genet |
| T2D | established | 11p15.1 | KCNJ11              | rs5215-C        | 0,148420005 | 1,924 cases,2,938<br>controls                                             | 3,757 cases,5,346 controls<br>(also includes meta-<br>analysis from<br>DGI+FUSION+WTCCC) | 17463249 | Science   |
| T2D | established | 11p15.1 | KCNJ11              | rs5219-T        | 0,139761942 | 1,924 cases, 2,938<br>controls                                            | 3,757 cases, 5,346 controls                                                              | 19056611 | Diabetes  |
| T2D | established | 11p15.1 | KCNJ11              | rs5219-T        | 0,139761942 | 1,924 cases, 2,938<br>controls                                            | 3,757 cases, 5,346 controls                                                              | 19056611 | Diabetes  |
| T2D | established | 11p15.1 | KCNJ11              | rs5219-T        | 0,139761942 | 1,464 cases,1,467<br>controls                                             | 5,065 cases,5,785 controls<br>(also includes meta-<br>analysis from<br>DGI+FUSION+WTCCC) | 17463246 | Science   |
| T2D | established | 11p15.1 | KCNJ11              | rs5219-T        | 0,139761942 | 1,161 cases,1,174<br>controls                                             | 1,215 cases,1,258 controls<br>(also includes meta-<br>analysis from<br>DGI+FUSION+WTCCC) | 17463248 | Science   |
| T2D | established | 9p21.3  | CDKN2B-AS1          | rs564398-T      | 0,122217633 | 1,924 cases,2,938<br>controls                                             | 3,757 cases,5,346 controls<br>(also includes meta-<br>analysis from<br>DGI+FUSION+WTCCC) | 17463249 | Science   |
| T2D | established | Xq28    | KRT18P48 -<br>DUSP9 | rs5945326-<br>A | 0,2390169   | 8,130 European<br>ancestry cases, 38,987<br>European ancestry<br>controls | Up to 34,412 European<br>ancestry cases, 59,925<br>European ancestry controls            | 20581827 | Nat Genet |
| T2D | established | 6p22.3  | CDKAL1              | rs6931514-<br>G | 0,223143551 | 4,549 cases,5,579<br>controls                                             | 24,194 cases,55,598<br>controls                                                          | 18372903 | Nat Genet |
| T2D | established | 9p21.3  | UBA52P6 -<br>DMRTA1 | rs7020996-<br>C | 0,231111721 | 4,549 cases,5,579<br>controls                                             | 24,194 cases,55,598<br>controls                                                          | 18372903 | Nat Genet |
| T2D | established | 2q36.3  | NYAP2 - IRS1        | rs7578326-<br>A | 0,104360015 | 8,130 European<br>ancestry cases, 38,987<br>European ancestry<br>controls | Up to 34,412 European<br>ancestry cases, 59,925<br>European ancestry controls            | 20581827 | Nat Genet |
| T2D | established | 2p21    | THADA               | rs7578597-<br>T | 0,139761942 | 4,549 cases,5,579<br>controls                                             | 24,194 cases,55,598<br>controls                                                          | 18372903 | Nat Genet |

|     |             |         |                    |                 |             |                                                                                                                                  |                                                                                               |          |                          |
|-----|-------------|---------|--------------------|-----------------|-------------|----------------------------------------------------------------------------------------------------------------------------------|-----------------------------------------------------------------------------------------------|----------|--------------------------|
| T2D | established | 4q27    | ANXA5 -<br>TMEM155 | rs7659604-<br>T | 0,300104592 | 1,924 cases,2,938<br>controls                                                                                                    | (see Zeggini 2007)                                                                            | 17554300 | Nature                   |
| T2D | established | 6p22.3  | CDKAL1             | rs7754840-<br>C | 0,113328685 | 1,464 cases,1,467<br>controls                                                                                                    | 5,065 cases,5,785 controls<br>(also includes meta-<br>analysis from<br>DGI+FUSION+WTCCC)      | 17463246 | Science                  |
| T2D | established | 6p22.3  | CDKAL1             | rs7754840-<br>C | 0,113328685 | 1,161 cases,1,174<br>controls                                                                                                    | 1,215 cases,1,258 controls<br>(also includes meta-<br>analysis from<br>DGI+FUSION+WTCCC)      | 17463248 | Science                  |
| T2D | established | 6p22.3  | CDKAL1             | rs7756992-<br>G | 0,182321557 | 1,399 EA cases,5,275<br>EA controls                                                                                              | 2,437 EA cases,7,287 EA<br>controls                                                           | 17460697 | Nat Genet                |
| T2D | established | 10q25.2 | TCF7L2             | rs7901695-<br>C | 0,31481074  | 1,924 cases,2,938<br>controls                                                                                                    | 3,757 cases,5,346 controls<br>(also includes meta-<br>analysis from<br>DGI+FUSION+WTCCC)      | 17463249 | Science                  |
| T2D | established | 10q25.2 | TCF7L2             | rs7903146-<br>A | 0,500775288 | 1,924 cases, 2,938<br>controls                                                                                                   | 3,757 cases, 5,346 controls                                                                   | 19056611 | Diabetes                 |
| T2D | established | 10q25.2 | TCF7L2             | rs7903146-<br>T | 0,500775288 | 1,924 cases, 2,938<br>controls                                                                                                   | 3,757 cases, 5,346 controls                                                                   | 19056611 | Diabetes                 |
| T2D | established | 10q25.2 | TCF7L2             | rs7903146-<br>T | 0,500775288 | 1,399 EA cases,5,275<br>EA controls                                                                                              | 2,437 EA cases,7,287 EA<br>controls                                                           | 17460697 | Nat Genet                |
| T2D | established | 10q25.2 | TCF7L2             | rs7903146-<br>T | 0,500775288 | 500 cases,497 controls                                                                                                           | 2,573 cases,2,776 controls                                                                    | 17668382 | Am J Hum Genet           |
| T2D | established | 10q25.2 | TCF7L2             | rs7903146-<br>T | 0,500775288 | 2,112 lean type 2<br>diabetes cases, 4,123<br>obese type 2 diabetes<br>cases, 54,412 controls                                    | 2,881 lean type 2 diabetes<br>cases, 8,702 obese type 2<br>diabetes cases, 18,957<br>controls | 22693455 | PLoS Genet               |
| T2D | established | 10q25.2 | TCF7L2             | rs7903146-<br>T | 0,500775288 | 2,112 lean type 2<br>diabetes cases, 4,123<br>obese type 2 diabetes<br>cases, 54,412 controls                                    | 2,881 lean type 2 diabetes<br>cases, 8,702 obese type 2<br>diabetes cases, 18,957<br>controls | 22693455 | PLoS Genet               |
| T2D | established | 10q25.2 | TCF7L2             | rs7903146-<br>T | 0,500775288 | 2,413 European<br>ancestry cases, 810<br>African American cases,<br>2,392 European<br>ancestry controls, 873<br>African American | NR                                                                                            | 22101970 | J Am Med<br>Inform Assoc |

|     |             |          |               |             |             |                                                                  |                                                                                |          |           |
|-----|-------------|----------|---------------|-------------|-------------|------------------------------------------------------------------|--------------------------------------------------------------------------------|----------|-----------|
|     |             |          |               |             |             | controls                                                         |                                                                                |          |           |
| T2D | established | 10q25.2  | TCF7L2        | rs7903146-T | 0,500775288 | 8,130 European ancestry cases, 38,987 European ancestry controls | Up to 34,412 European ancestry cases, 59,925 European ancestry controls        | 20581827 | Nat Genet |
| T2D | established | 10q25.2  | TCF7L2        | rs7903146-T | 0,500775288 | 4,549 cases,5,579 controls                                       | 24,194 cases,55,598 controls                                                   | 18372903 | Nat Genet |
| T2D | established | 10q25.2  | TCF7L2        | rs7903146-T | 0,500775288 | 1,464 cases,1,467 controls                                       | 5,065 cases,5,785 controls (also includes meta-analysis from DGI+FUSION+WTCCC) | 17463246 | Science   |
| T2D | established | 10q25.2  | TCF7L2        | rs7903146-T | 0,500775288 | 1,161 cases,1,174 controls                                       | 1,215 cases,1,258 controls (also includes meta-analysis from DGI+FUSION+WTCCC) | 17463248 | Science   |
| T2D | established | 10q25.2  | TCF7L2        | rs7903146-T | 0,500775288 | 661 cases,614 controls                                           | 2,617 cases,2,894 controls                                                     | 17293876 | Nature    |
| T2D | established | 10q25.2  | TCF7L2        | rs7903146-T | 0,500775288 | 679 French cases, 697 French controls                            | 5,579 European cases, 7,096 European controls                                  | 19734900 | Nat Genet |
| T2D | established | 12q24.31 | OASL          | rs7957197-T | 0,067658648 | 8,130 European ancestry cases, 38,987 European ancestry controls | Up to 34,412 European ancestry cases, 59,925 European ancestry controls        | 20581827 | Nat Genet |
| T2D | established | 12q21.1  | TSPAN8 - LGR5 | rs7961581-C | 0,086177696 | 4,549 cases,5,579 controls                                       | 24,194 cases,55,598 controls                                                   | 18372903 | Nat Genet |
| T2D | established | 15q26.1  | PRC1          | rs8042680-A | 0,067658648 | 8,130 European ancestry cases, 38,987 European ancestry controls | Up to 34,412 European ancestry cases, 59,925 European ancestry controls        | 20581827 | Nat Genet |
| T2D | established | 16q12.2  | FTO           | rs8050136-A | 0,207014169 | 1,924 cases, 2,938 controls                                      | 3,757 cases, 5,346 controls                                                    | 19056611 | Diabetes  |
| T2D | established | 16q12.2  | FTO           | rs8050136-A | 0,207014169 | 4,549 cases,5,579 controls                                       | 24,194 cases,55,598 controls                                                   | 18372903 | Nat Genet |
| T2D | established | 16q12.2  | FTO           | rs8050136-A | 0,207014169 | 1,161 cases,1,174 controls                                       | 1,215 cases,1,258 controls (also includes meta-analysis from DGI+FUSION+WTCCC) | 17463248 | Science   |
| T2D | established | 16q12.2  | FTO           | rs8050136-  | 0,207014169 | 1,924 cases,2,938                                                | 3,757 cases,5,346 controls                                                     | 17463249 | Science   |



|                     |             |         |                  |              |             |                                                                                      |                                                                                       |          |                               |
|---------------------|-------------|---------|------------------|--------------|-------------|--------------------------------------------------------------------------------------|---------------------------------------------------------------------------------------|----------|-------------------------------|
|                     |             |         |                  | A            |             | controls                                                                             | (also includes meta-analysis from DGI+FUSION+WTCCC)                                   |          |                               |
| T2D                 | established | 7p15.1  | JAZF1            | rs849134-A   | 0,122217633 | 8,130 European ancestry cases, 38,987 European ancestry controls                     | Up to 34,412 European ancestry cases, 59,925 European ancestry controls               | 20581827 | Nat Genet                     |
| T2D                 | established | 7p15.1  | JAZF1            | rs864745-T   | 0,09531018  | 4,549 cases,5,579 controls                                                           | 24,194 cases,55,598 controls                                                          | 18372903 | Nat Genet                     |
| T2D                 | established | 8q22.1  | TP53INP1         | rs896854-T   | 0,058268908 | 8,130 European ancestry cases, 38,987 European ancestry controls                     | Up to 34,412 European ancestry cases, 59,925 European ancestry controls               | 20581827 | Nat Genet                     |
| T2D                 | established | 11p12   | RPL9P23 - API5   | rs9300039-C  | 0,392042088 | 1,161 cases,1,174 controls                                                           | 1,215 cases,1,258 controls (also includes meta-analysis from DGI+FUSION+WTCCC)        | 17463248 | Science                       |
| T2D                 | established | 6p22.3  | CDKAL1           | rs9465871-C  | 0,165514438 | 1,924 cases,2,938 controls                                                           | (see Zeggini 2007)                                                                    | 17554300 | Nature                        |
| T2D                 | established | 6p21.1  | VEGFA - C6orf223 | rs9472138-T  | 0,058268908 | 4,549 cases,5,579 controls                                                           | 24,194 cases,55,598 controls                                                          | 18372903 | Nat Genet                     |
| T2D                 | established | 7q32.3  | KLF14 - FLJ43663 | rs972283-G   | 0,067658648 | 8,130 European ancestry cases, 38,987 European ancestry controls                     | Up to 34,412 European ancestry cases, 59,925 European ancestry controls               | 20581827 | Nat Genet                     |
| T2D                 | established | 16q12.2 | FTO              | rs9939609-A  | 0,292669614 | 2,112 lean type 2 diabetes cases, 4,123 obese type 2 diabetes cases, 54,412 controls | 2,881 lean type 2 diabetes cases, 8,702 obese type 2 diabetes cases, 18,957 controls  | 22693455 | PLoS Genet                    |
| T2D                 | established | 16q12.2 | FTO              | rs9939609-A  | 0,292669614 | 1,924 cases,2,938 controls                                                           | (see Zeggini 2007)                                                                    | 17554300 | Nature                        |
| triglyceride levels | established | 8p21.3  | LPL - RPL30P9    | rs10096633-G | 0,1         | 17,815 individuals                                                                   | NR                                                                                    | 19060911 | Nat Genet                     |
| triglyceride levels | established | 8p21.3  | LPL - RPL30P9    | rs10105606-C | 0,1         | up to 17,243 white European descent individuals                                      | up to 37,774 white European descent individuals, up to 9,665 Indian Asian individuals | 20864672 | Arterioscler Thromb Vasc Biol |
| triglyceride        | established | 8p21.3  | LPL - RPL30P9    | rs10503669-  | 0,1         | 8,684 individuals                                                                    | 5,312-9,707 individuals                                                               | 18193043 | Nat Genet                     |

|                     |             |         |                  |              |      |                                                                                  |                                                                                       |          |                               |
|---------------------|-------------|---------|------------------|--------------|------|----------------------------------------------------------------------------------|---------------------------------------------------------------------------------------|----------|-------------------------------|
| levels              |             |         |                  | T            |      |                                                                                  |                                                                                       |          |                               |
| triglyceride levels | established | 1p31.3  | DOCK7            | rs10889353-C | -0,1 | 19,840 individuals                                                               | Up to 20,623 individuals                                                              | 19060906 | Nat Genet                     |
| triglyceride levels | established | 11q23.3 | DSCAML1          | rs10892151-A | 0,1  | 809 individuals                                                                  | 698 individuals                                                                       | 19074352 | Science                       |
| triglyceride levels | established | 1p31.3  | DOCK7            | rs1167998-C  | -0,1 | 17,815 individuals                                                               | NR                                                                                    | 19060911 | Nat Genet                     |
| triglyceride levels | established | 1p31.3  | DOCK7            | rs1168013-G  | 0,1  | up to 17,243 white European descent individuals                                  | up to 37,774 white European descent individuals, up to 9,665 Indian Asian individuals | 20864672 | Arterioscler Thromb Vasc Biol |
| triglyceride levels | established | 7q11.23 | BAZ1B            | rs1178979-A  | 0,1  | up to 17,243 white European descent individuals                                  | up to 37,774 white European descent individuals, up to 9,665 Indian Asian individuals | 20864672 | Arterioscler Thromb Vasc Biol |
| triglyceride levels | established | 1p31.3  | RPL13AP9 - ATG4C | rs12130333-T | -0,1 | 2,758 individuals                                                                | 18,544 individuals                                                                    | 18193044 | Nat Genet                     |
| triglyceride levels | established | 11q23.3 | RPL15P15 - BUD13 | rs12272004-C | -0,1 | 17,815 individuals                                                               | NR                                                                                    | 19060911 | Nat Genet                     |
| triglyceride levels | established | 11q23.3 | ZNF259           | rs12286037-T | 0,1  | 6,668 Caucasian individuals                                                      | NR                                                                                    | 20442857 | PLoS Genet                    |
| triglyceride levels | established | 11q23.3 | ZNF259           | rs12286037-T | 0,1  | 8,684 individuals                                                                | 5,312-9,707 individuals                                                               | 18193043 | Nat Genet                     |
| triglyceride levels | established | 2p23.3  | GCKR             | rs1260326-T  | 0,1  | 463 European ancestry cases, 1,197 European ancestry controls                    | NR                                                                                    | 20657596 | Nat Genet                     |
| triglyceride levels | established | 2p23.3  | GCKR             | rs1260326-T  | 0,1  | Up to 52,350 European ancestry individuals, up to 8,739 Indian Asian individuals | NR                                                                                    | 22001757 | Nat Genet                     |
| triglyceride levels | established | 2p23.3  | GCKR             | rs1260326-T  | 0,1  | Up to 96,598 European descent individuals                                        |                                                                                       | 20686565 | Nature                        |
| triglyceride levels | established | 2p23.3  | GCKR             | rs1260326-T  | 0,1  | 19,840 individuals                                                               | Up to 20,623 individuals                                                              | 19060906 | Nat Genet                     |
| triglyceride levels | established | 2p23.3  | GCKR - C2orf16   | rs1260333-C  | -0,1 | up to 17,243 white European descent individuals                                  | up to 37,774 white European descent individuals, up to 9,665 Indian Asian individuals | 20864672 | Arterioscler Thromb Vasc Biol |

|                     |             |          |                  |              |      |                                                 |                                                                                       |          |                               |
|---------------------|-------------|----------|------------------|--------------|------|-------------------------------------------------|---------------------------------------------------------------------------------------|----------|-------------------------------|
| triglyceride levels | established | 8p21.3   | LPL - RPL30P9    | rs12678919-G | -0,1 | Up to 96,598 European descent individuals       |                                                                                       | 20686565 | Nature                        |
| triglyceride levels | established | 8p21.3   | LPL - RPL30P9    | rs12678919-G | -0,1 | 19,840 individuals                              | Up to 20,623 individuals                                                              | 19060906 | Nat Genet                     |
| triglyceride levels | established | 11q23.3  | RPL15P15 - BUD13 | rs1558861-C  | 0,1  | 2,011 individuals                               | 10,536 individuals                                                                    | 18193046 | Nat Genet                     |
| triglyceride levels | established | 19p13.11 | CILP2 - PBX4     | rs16996148-T | -0,1 | 8,684 individuals                               | 5,312-9,707 individuals                                                               | 18193043 | Nat Genet                     |
| triglyceride levels | established | 19p13.11 | CILP2 - PBX4     | rs16996148-T | -0,1 | 2,758 individuals                               | 18,544 individuals                                                                    | 18193044 | Nat Genet                     |
| triglyceride levels | established | 7q11.23  | TBL2             | rs17145738-T | -0,1 | 8,684 individuals                               | 5,312-9,707 individuals                                                               | 18193043 | Nat Genet                     |
| triglyceride levels | established | 7q11.23  | TBL2             | rs17145738-T | -0,1 | Up to 96,598 European descent individuals       |                                                                                       | 20686565 | Nature                        |
| triglyceride levels | established | 7q11.23  | TBL2             | rs17145738-T | -0,1 | 2,758 individuals                               | 18,544 individuals                                                                    | 18193044 | Nat Genet                     |
| triglyceride levels | established | 19p13.11 | CILP2 - PBX4     | rs17216525-T | -0,1 | 19,840 individuals                              | Up to 20,623 individuals                                                              | 19060906 | Nat Genet                     |
| triglyceride levels | established | 8q24.13  | TRIB1 - FAM84B   | rs17321515-A | 0,1  | 8,684 individuals                               | 5,312-9,707 individuals                                                               | 18193043 | Nat Genet                     |
| triglyceride levels | established | 8q24.13  | TRIB1 - FAM84B   | rs17321515-A | 0,1  | 2,758 individuals                               | 18,544 individuals                                                                    | 18193044 | Nat Genet                     |
| triglyceride levels | established | 11q12.2  | FADS1            | rs174547-C   | 0,1  | 8,330 European ancestry individuals             | NR                                                                                    | 22286219 | Nat Genet                     |
| triglyceride levels | established | 11q12.2  | FADS1            | rs174547-C   | 0,1  | 19,840 individuals                              | Up to 20,623 individuals                                                              | 19060906 | Nat Genet                     |
| triglyceride levels | established | 11q12.2  | FADS1            | rs174547-C   | 0,1  | 8,866 European ancestry individuals             | NR                                                                                    | 21829377 | PLoS Genet                    |
| triglyceride levels | established | 11q12.2  | FADS1            | rs174547-C   | 0,1  | 8,866 European ancestry individuals             | NR                                                                                    | 21829377 | PLoS Genet                    |
| triglyceride levels | established | 11q12.2  | FADS1            | rs174548-G   | 0,1  | up to 17,243 white European descent individuals | up to 37,774 white European descent individuals, up to 9,665 Indian Asian individuals | 20864672 | Arterioscler Thromb Vasc Biol |
| triglyceride levels | established | 1p31.3   | DOCK7            | rs1748195-C  | 0,1  | 8,684 individuals                               | 5,312-9,707 individuals                                                               | 18193043 | Nat Genet                     |
| triglyceride levels | established | 16q13    | CETP             | rs1800775-C  | 0,1  | up to 5,217 individuals                         | NR                                                                                    | 17463246 | Science                       |

|                     |             |          |                |              |      |                                                 |                                                                                       |          |                               |
|---------------------|-------------|----------|----------------|--------------|------|-------------------------------------------------|---------------------------------------------------------------------------------------|----------|-------------------------------|
| triglyceride levels | established | 16q13    | CETP           | rs1800775-C  | 0,1  | up to 5,217 individuals                         | NR                                                                                    | 17463246 | Science                       |
| triglyceride levels | established | 11q23.3  | SIK3           | rs2075292-G  | 0,1  | 2,011 individuals                               | 10,536 individuals                                                                    | 18193046 | Nat Genet                     |
| triglyceride levels | established | 1q42.13  | GALNT2         | rs2144300-C  | 0,1  | 8,684 individuals                               | 5,312-9,707 individuals                                                               | 18193043 | Nat Genet                     |
| triglyceride levels | established | 7q11.23  | BAZ1B          | rs2240466-G  | 0,1  | 17,815 individuals                              | NR                                                                                    | 19060911 | Nat Genet                     |
| triglyceride levels | established | 19p13.11 | ZNF101         | rs2304130-G  | -0,1 | 4,034 European ancestry individuals             | NR                                                                                    | 22359512 | PLoS Genet                    |
| triglyceride levels | established | 19p13.11 | ZNF101         | rs2304130-G  | -0,1 | up to 17,243 white European descent individuals | up to 37,774 white European descent individuals, up to 9,665 Indian Asian individuals | 20864672 | Arterioscler Thromb Vasc Biol |
| triglyceride levels | established | 19p13.11 | ZNF101         | rs2304130-G  | -0,1 | 17,815 individuals                              | NR                                                                                    | 19060911 | Nat Genet                     |
| triglyceride levels | established | 11q23.3  | BUD13          | rs28927680-G | 0,1  | 2,758 individuals                               | 18,544 individuals                                                                    | 18193044 | Nat Genet                     |
| triglyceride levels | established | 8q24.13  | TRIB1 - FAM84B | rs2954029-T  | -0,1 | up to 17,243 white European descent individuals | up to 37,774 white European descent individuals, up to 9,665 Indian Asian individuals | 20864672 | Arterioscler Thromb Vasc Biol |
| triglyceride levels | established | 8q24.13  | TRIB1 - FAM84B | rs2954029-T  | -0,1 | Up to 96,598 European descent individuals       |                                                                                       | 20686565 | Nature                        |
| triglyceride levels | established | 8q24.13  | TRIB1 - FAM84B | rs2954029-T  | -0,1 | 19,840 individuals                              | Up to 20,623 individuals                                                              | 19060906 | Nat Genet                     |
| triglyceride levels | established | 8p21.3   | LPL            | rs326-A      | 0,1  | 2,011 individuals                               | 10,536 individuals                                                                    | 18193046 | Nat Genet                     |
| triglyceride levels | established | 8p21.3   | LPL            | rs328-G      | -0,1 | 2,758 individuals                               | 18,544 individuals                                                                    | 18193044 | Nat Genet                     |
| triglyceride levels | established | 8p21.3   | LPL            | rs328-G      | -0,1 | up to 5,217 individuals                         | NR                                                                                    | 17463246 | Science                       |
| triglyceride levels | established | 7q11.23  | MLXIPL         | rs3812316-C  | 0,1  | 2,011 individuals                               | 10,536 individuals                                                                    | 18193046 | Nat Genet                     |
| triglyceride levels | established | 19q13.32 | APOE - APOC1   | rs439401-G   | 0,1  | 17,815 individuals                              | NR                                                                                    | 19060911 | Nat Genet                     |
| triglyceride levels | established | 19q13.32 | APOE - APOC1   | rs439401-G   | 0,1  | Up to 96,598 European descent individuals       |                                                                                       | 20686565 | Nature                        |

|                     |             |          |                   |             |      |                                                               |                                                                                       |          |                               |
|---------------------|-------------|----------|-------------------|-------------|------|---------------------------------------------------------------|---------------------------------------------------------------------------------------|----------|-------------------------------|
| triglyceride levels | established | 19q13.32 | APOC1             | rs4420638-G | 0,1  | 13,664 European ancestry individuals                          | NR                                                                                    | 22003152 | Eur Heart J                   |
| triglyceride levels | established | 19q13.32 | APOC1             | rs4420638-G | 0,1  | 6,668 Caucasian individuals                                   | NR                                                                                    | 20442857 | PLoS Genet                    |
| triglyceride levels | established | 19q13.32 | APOC1             | rs4420638-G | 0,1  | up to 5,217 individuals                                       | NR                                                                                    | 17463246 | Science                       |
| triglyceride levels | established | 4q22.1   | AFF1              | rs442177-A  | 0,1  | up to 17,243 white European descent individuals               | up to 37,774 white European descent individuals, up to 9,665 Indian Asian individuals | 20864672 | Arterioscler Thromb Vasc Biol |
| triglyceride levels | established | 4q22.1   | AFF1              | rs442177-A  | 0,1  | Up to 96,598 European descent individuals                     |                                                                                       | 20686565 | Nature                        |
| triglyceride levels | established | 2p24.1   | APOB - KLHL29     | rs4635554-G | 0,1  | 463 European ancestry cases, 1,197 European ancestry controls | NR                                                                                    | 20657596 | Nat Genet                     |
| triglyceride levels | established | 15q21.3  | RPL28P4 - LIPC    | rs4775041-C | 0,1  | 8,684 individuals                                             | 5,312-9,707 individuals                                                               | 18193043 | Nat Genet                     |
| triglyceride levels | established | 1q42.13  | GALNT2            | rs4846914-G | 0,1  | 2,758 individuals                                             | 18,544 individuals                                                                    | 18193044 | Nat Genet                     |
| triglyceride levels | established | 1q42.13  | GALNT2            | rs4846914-G | 0,1  | Up to 96,598 European descent individuals                     |                                                                                       | 20686565 | Nature                        |
| triglyceride levels | established | 11q23.3  | RPL15P15 - BUD13  | rs4938303-T | -0,1 | up to 17,243 white European descent individuals               | up to 37,774 white European descent individuals, up to 9,665 Indian Asian individuals | 20864672 | Arterioscler Thromb Vasc Biol |
| triglyceride levels | established | 2p24.1   | C2orf43 - APOB    | rs6544366-T | -0,1 | up to 17,243 white European descent individuals               | up to 37,774 white European descent individuals, up to 9,665 Indian Asian individuals | 20864672 | Arterioscler Thromb Vasc Biol |
| triglyceride levels | established | 2p24.1   | C2orf43 - APOB    | rs6754295-C | -0,1 | 17,815 individuals                                            | NR                                                                                    | 19060911 | Nat Genet                     |
| triglyceride levels | established | 5q11.2   | RPL26P19 - MAP3K1 | rs6867983-T | 0,1  | up to 17,243 white European descent individuals               | up to 37,774 white European descent individuals, up to 9,665 Indian Asian individuals | 20864672 | Arterioscler Thromb Vasc Biol |
| triglyceride levels | established | 2p24.1   | APOB              | rs693-A     | 0,1  | 2,758 individuals                                             | 18,544 individuals                                                                    | 18193044 | Nat Genet                     |
| triglyceride        | established | 2p24.1   | APOB              | rs693-A     | 0,1  | up to 5,217 individuals                                       | NR                                                                                    | 17463246 | Science                       |

|                     |                       |          |                |             |      |                                                               |                          |          |                      |
|---------------------|-----------------------|----------|----------------|-------------|------|---------------------------------------------------------------|--------------------------|----------|----------------------|
| levels              |                       |          |                |             |      |                                                               |                          |          |                      |
| triglyceride levels | established           | 7q11.23  | BAZ1B          | rs714052-G  | -0,1 | 463 European ancestry cases, 1,197 European ancestry controls | NR                       | 20657596 | Nat Genet            |
| triglyceride levels | established           | 7q11.23  | BAZ1B          | rs714052-G  | -0,1 | 19,840 individuals                                            | Up to 20,623 individuals | 19060906 | Nat Genet            |
| triglyceride levels | established           | 2p24.1   | C2orf43 - APOB | rs7557067-G | -0,1 | 19,840 individuals                                            | Up to 20,623 individuals | 19060906 | Nat Genet            |
| triglyceride levels | established           | 20q13.12 | PCIF1          | rs7679-C    | 0,1  | 19,840 individuals                                            | Up to 20,623 individuals | 19060906 | Nat Genet            |
| triglyceride levels | established           | 2p23.3   | GCKR           | rs780094-T  | 0,1  | 17,815 individuals                                            | NR                       | 19060911 | Nat Genet            |
| triglyceride levels | established           | 2p23.3   | GCKR           | rs780094-T  | 0,1  | 8,866 European ancestry individuals                           | NR                       | 21829377 | PLoS Genet           |
| triglyceride levels | established           | 2p23.3   | GCKR           | rs780094-T  | 0,1  | 2,758 individuals                                             | 18,544 individuals       | 18193044 | Nat Genet            |
| triglyceride levels | established           | 2p23.3   | GCKR           | rs780094-T  | 0,1  | 8,684 individuals                                             | 5,312-9,707 individuals  | 18193043 | Nat Genet            |
| triglyceride levels | established           | 8p23.1   | XKR6           | rs7819412-G | -0,1 | 19,840 individuals                                            | Up to 20,623 individuals | 19060906 | Nat Genet            |
| triglyceride levels | established           | 11q23.3  | ZNF259         | rs964184-G  | 0,1  | 4,034 European ancestry individuals                           | NR                       | 22359512 | PLoS Genet           |
| triglyceride levels | established           | 11q23.3  | ZNF259         | rs964184-G  | 0,1  | 13,664 European ancestry individuals                          | NR                       | 22003152 | Eur Heart J          |
| triglyceride levels | established           | 11q23.3  | ZNF259         | rs964184-G  | 0,1  | 463 European ancestry cases, 1,197 European ancestry controls | NR                       | 20657596 | Nat Genet            |
| triglyceride levels | established           | 11q23.3  | ZNF259         | rs964184-G  | 0,1  | Up to 96,598 European descent individuals                     |                          | 20686565 | Nature               |
| triglyceride levels | established           | 11q23.3  | ZNF259         | rs964184-G  | 0,1  | 19,840 individuals                                            | Up to 20,623 individuals | 19060906 | Nat Genet            |
| uric acid           | less well established | 12q13.3  | R3HDM2 - INHBC | rs1106766-T | -0,1 | 28,283 white individuals                                      | 22,054 women             | 20884846 | Circ Cardioasc Genet |
| uric acid           | less well established | 6p22.2   | SLC17A1        | rs1165196-G | -0,1 | 28,283 white individuals                                      | 22,054 women             | 20884846 | Circ Cardioasc Genet |
| uric acid           | less well established | 6p22.2   | SLC17A1        | rs1183201-A | -0,1 | 12,328 European ancestry males, 15,813 European ancestry      | NR                       | 19503597 | PLoS Genet           |

|           |                       |         |               |              |      |                                                                  |                    |          |                       |
|-----------|-----------------------|---------|---------------|--------------|------|------------------------------------------------------------------|--------------------|----------|-----------------------|
|           |                       |         |               |              |      | females                                                          |                    |          |                       |
| uric acid | less well established | 1q21.1  | PDZK1         | rs12129861-A | -0,1 | 12,328 European ancestry males, 15,813 European ancestry females | NR                 | 19503597 | PLoS Genet            |
| uric acid | less well established | 10q21.2 | SLC16A9       | rs12356193-A | 0,1  | 12,328 European ancestry males, 15,813 European ancestry females | NR                 | 19503597 | PLoS Genet            |
| uric acid | less well established | 4p16.1  | SLC2A9        | rs13129697-G | -0,5 | 28,283 white individuals                                         | 22,054 women       | 20884846 | Circ Cardiovasc Genet |
| uric acid | less well established | 4p16.1  | SLC2A9        | rs13129697-G | -0,5 | 1,300 European ancestry individuals                              | NR                 | 22229870 | Ann Hum Genet         |
| uric acid | less well established | 4p16.1  | SLC2A9        | rs13129697-G | -0,5 | 28,283 white individuals                                         | 22,054 women       | 20884846 | Circ Cardiovasc Genet |
| uric acid | less well established | 4p16.1  | SLC2A9        | rs16890979-T | -0,1 | 408 women,460 men                                                | NR                 | 18759275 | Arthritis Rheum       |
| uric acid | less well established | 4p16.1  | SLC2A9        | rs16890979-T | -0,1 | 11,847 individuals                                               | 14,867 individuals | 18834626 | Lancet                |
| uric acid | less well established | 11q13.1 | SLC22A11      | rs17300741-A | 0,1  | 12,328 European ancestry males, 15,813 European ancestry females | NR                 | 19503597 | PLoS Genet            |
| uric acid | less well established | 1q21.1  | CD160 - PDZK1 | rs1967017-T  | 0,1  | 28,283 white individuals                                         | 22,054 women       | 20884846 | Circ Cardiovasc Genet |
| uric acid | less well established | 11q13.1 | SLC22A11      | rs2078267-C  | 0,1  | 28,283 white individuals                                         | 22,054 women       | 20884846 | Circ Cardiovasc Genet |
| uric acid | less well established | 11q13.1 | SLC22A11      | rs2078267-C  | 0,1  | 28,283 white individuals                                         | 22,054 women       | 20884846 | Circ Cardiovasc Genet |
| uric acid | less well established | 1q23.3  | -             | rs2199936-A  | 0,5  | 28,283 white individuals                                         | 22,054 women       | 20884846 | Circ Cardiovasc Genet |
| uric acid | less well established | 1q23.3  | -             | rs2199936-A  | 0,5  | 28,283 white individuals                                         | 22,054 women       | 20884846 | Circ Cardiovasc Genet |
| uric acid | less well established | 4q22.1  | ABCG2         | rs2231142-T  | 0,1  | 11,847 individuals                                               | 14,867 individuals | 18834626 | Lancet                |
| uric acid | less well established | 4q22.1  | ABCG2         | rs2231142-T  | 0,1  | 1,300 European ancestry individuals                              | NR                 | 22229870 | Ann Hum Genet         |
| uric acid | less well             | 4q22.1  | ABCG2         | rs2231142-   | 0,1  | 12,328 European                                                  | NR                 | 19503597 | PLoS Genet            |

|           |                          |         |                |                 |      |                                                                           |                                                                                 |          |                          |
|-----------|--------------------------|---------|----------------|-----------------|------|---------------------------------------------------------------------------|---------------------------------------------------------------------------------|----------|--------------------------|
|           | established              |         |                | T               |      | ancestry males, 15,813<br>European ancestry<br>females                    |                                                                                 |          |                          |
| uric acid | less well<br>established | 4q22.1  | ABCG2          | rs2231142-<br>T | 0,1  | 12,328 European<br>ancestry males, 15,813<br>European ancestry<br>females | NR                                                                              | 19503597 | PLoS Genet               |
| uric acid | less well<br>established | 11q13.1 | SLC22A12       | rs505802-T      | -0,1 | 12,328 European<br>ancestry males, 15,813<br>European ancestry<br>females | NR                                                                              | 19503597 | PLoS Genet               |
| uric acid | less well<br>established | 6p24.3  | BTF3P7 - RREB1 | rs675209-T      | 0,1  | 28,283 white<br>individuals                                               | 22,054 women                                                                    | 20884846 | Circ Cardiovasc<br>Genet |
| uric acid | less well<br>established | 4p16.1  | SLC2A9         | rs6855911-<br>A | 0,1  | 4,305 Sardinian<br>individuals                                            | 1,301 Sardinian<br>individuals                                                  | 17997608 | PLoS Genet               |
| uric acid | less well<br>established | 4p16.1  | SLC2A9         | rs734553-T      | 0,1  | 12,328 European<br>ancestry males, 15,813<br>European ancestry<br>females | NR                                                                              | 19503597 | PLoS Genet               |
| uric acid | less well<br>established | 4p16.1  | SLC2A9         | rs734553-T      | 0,1  | 12,328 European<br>ancestry males, 15,813<br>European ancestry<br>females | NR                                                                              | 19503597 | PLoS Genet               |
| uric acid | less well<br>established | 4p16.1  | SLC2A9         | rs737267-C      | -0,1 | 794 individuals                                                           | 706 individuals                                                                 | 18327257 | Nat Genet                |
| uric acid | less well<br>established | 6p22.2  | LRRRC16A       | rs742132-A      | 0,1  | 12,328 European<br>ancestry males, 15,813<br>European ancestry<br>females | NR                                                                              | 19503597 | PLoS Genet               |
| uric acid | less well<br>established | 4p16.1  | SLC2A9         | rs7442295-<br>A | 0,1  | 1,955 hypertensive<br>individuals                                         | 2,033 individuals in 519<br>families; 1,461 twins<br>(1/pair selected randomly) | 18179892 | Am J Hum Genet           |
| uric acid | less well<br>established | 4p16.1  | SLC2A9         | rs7442295-<br>A | 0,1  | 1,644 individuals                                                         | 9,947 individuals                                                               | 18327256 | Nat Genet                |
| uric acid | less well<br>established | 2p23.3  | GCKR           | rs780093-T      | 0,1  | 28,283 white<br>individuals                                               | 22,054 women                                                                    | 20884846 | Circ Cardiovasc<br>Genet |
| uric acid | less well<br>established | 2p23.3  | GCKR           | rs780094-T      | 0,1  | 12,328 European<br>ancestry males, 15,813                                 | NR                                                                              | 19503597 | PLoS Genet               |



|  |  |  |  |  |  |                              |  |  |  |
|--|--|--|--|--|--|------------------------------|--|--|--|
|  |  |  |  |  |  | European ancestry<br>females |  |  |  |
|--|--|--|--|--|--|------------------------------|--|--|--|

**Supplementary Table II.** Replication p-values and Odds Ratios for the clinic-based case/control replication set and the combined clinic-based derivation and replication set.

| <b>risk factor</b> | <b>p-value clinic-based replication sample</b> | <b>Odds ratio clinic-based replication sample [CI95]</b> | <b>p-value combined clinic-based derivation and replication sample</b> | <b>Odds ratio combined clinic-based derivation and replication sample [CI95]</b> |
|--------------------|------------------------------------------------|----------------------------------------------------------|------------------------------------------------------------------------|----------------------------------------------------------------------------------|
| AF                 | <b>0.0377</b>                                  | <b>1.05 [1.00;1.10]</b>                                  | <b>0.000271</b>                                                        | <b>1.06 [1.03;1.09]</b>                                                          |
| CAD                | <b>0.00912</b>                                 | <b>1.06 [1.02;1.12]</b>                                  | <b>0.000569</b>                                                        | <b>1.07 [1.03;1.11]</b>                                                          |
| DBP                | <b>0.0511</b>                                  | <b>1.05 [1.00;1.09]</b>                                  | <b>0.00867</b>                                                         | <b>1.06 [1.01;1.11]</b>                                                          |
| HTN                | 0.3621                                         | 1.02 [0.98;1.07]                                         | <b>0.04867</b>                                                         | <b>1.04 [1.00;1.09]</b>                                                          |
| SBP                | <b>0.00906</b>                                 | <b>1.06 [1.02;1.11]</b>                                  | <b>0.003219</b>                                                        | <b>1.06 [1.03;1.10]</b>                                                          |

**Supplementary Table III.** SNPs used in the construction of the cGRS

| <b>Risk factor</b>      | <b>Variants included in the cGRS</b> |
|-------------------------|--------------------------------------|
| Atrial Fibrillation     | rs13376333                           |
| Atrial Fibrillation     | rs13038095                           |
| Atrial Fibrillation     | rs6843082                            |
| Atrial Fibrillation     | rs2106261                            |
| Atrial Fibrillation     | rs17042171                           |
| Atrial Fibrillation     | rs17375901                           |
| Atrial Fibrillation     | rs7193343                            |
| Atrial Fibrillation     | rs10033464                           |
| Atrial Fibrillation     | rs2200733                            |
| Atrial Fibrillation     | rs2220427                            |
| Atrial Fibrillation     | rs1448817                            |
| Atrial Fibrillation     | rs2723316                            |
| Atrial Fibrillation     | rs16997168                           |
| Atrial Fibrillation     | rs958800                             |
| Coronary Artery Disease | rs10933436                           |
| Coronary Artery Disease | rs10953541                           |
| Coronary Artery Disease | rs11206510                           |
| Coronary Artery Disease | rs1122608                            |
| Coronary Artery Disease | rs11556924                           |
| Coronary Artery Disease | rs12190287                           |
| Coronary Artery Disease | rs1231206                            |
| Coronary Artery Disease | rs12413409                           |
| Coronary Artery Disease | rs12526453                           |
| Coronary Artery Disease | rs12936587                           |
| Coronary Artery Disease | rs1332844                            |
| Coronary Artery Disease | rs1333049                            |
| Coronary Artery Disease | rs1412444                            |
| Coronary Artery Disease | rs16893526                           |
| Coronary Artery Disease | rs17114036                           |
| Coronary Artery Disease | rs17228212                           |
| Coronary Artery Disease | rs1746048                            |

|                         |            |
|-------------------------|------------|
| Coronary Artery Disease | rs17465637 |
| Coronary Artery Disease | rs17609940 |
| Coronary Artery Disease | rs17672135 |
| Coronary Artery Disease | rs216172   |
| Coronary Artery Disease | rs2259816  |
| Coronary Artery Disease | rs2306374  |
| Coronary Artery Disease | rs2505083  |
| Coronary Artery Disease | rs2895811  |
| Coronary Artery Disease | rs2943634  |
| Coronary Artery Disease | rs3184504  |
| Coronary Artery Disease | rs365302   |
| Coronary Artery Disease | rs3739998  |
| Coronary Artery Disease | rs3798220  |
| Coronary Artery Disease | rs3825807  |
| Coronary Artery Disease | rs4380028  |
| Coronary Artery Disease | rs46522    |
| Coronary Artery Disease | rs4773144  |
| Coronary Artery Disease | rs4937126  |
| Coronary Artery Disease | rs4977574  |
| Coronary Artery Disease | rs501120   |
| Coronary Artery Disease | rs579459   |
| Coronary Artery Disease | rs599839   |
| Coronary Artery Disease | rs646776   |
| Coronary Artery Disease | rs6725887  |
| Coronary Artery Disease | rs688034   |
| Coronary Artery Disease | rs6922269  |
| Coronary Artery Disease | rs7651039  |
| Coronary Artery Disease | rs7808424  |

|                         |            |
|-------------------------|------------|
| Disease                 |            |
| Coronary Artery Disease | rs7865618  |
| Coronary Artery Disease | rs8055236  |
| Coronary Artery Disease | rs964184   |
| Coronary Artery Disease | rs974819   |
| Coronary Artery Disease | rs9818870  |
| Coronary Artery Disease | rs9982601  |
| Hypertension            | rs13333226 |
| Hypertension            | rs11775334 |
| Hypertension            | rs2681472  |
| Hypertension            | rs11014166 |
| Hypertension            | rs16982520 |
| Hypertension            | rs11646213 |
| Hypertension            | rs2820037  |
| Hypertension            | rs2398162  |
| Hypertension            | rs1173771  |
| Hypertension            | rs1799945  |
| Hypertension            | rs805303   |
| Hypertension            | rs932764   |
| Hypertension            | rs633185   |
| Hypertension            | rs6015450  |
| Hypertension            | rs17367504 |
| Hypertension            | rs1813353  |
| Hypertension            | rs4590817  |
| Hypertension            | rs17249754 |
| Hypertension            | rs1378942  |
| Systolic Blood Pressure | rs2932538  |
| Systolic Blood Pressure | rs419076   |
| Systolic Blood Pressure | rs13107325 |
| Systolic Blood Pressure | rs1173771  |
| Systolic Blood Pressure | rs11953630 |
| Systolic Blood Pressure | rs1799945  |
| Systolic Blood Pressure | rs805303   |
| Systolic Blood Pressure | rs4373814  |
| Systolic Blood Pressure | rs932764   |
| Systolic Blood Pressure | rs7129220  |
| Systolic Blood Pressure | rs633185   |
| Systolic Blood Pressure | rs2521501  |
| Systolic Blood Pressure | rs17608766 |
| Systolic Blood Pressure | rs1327235  |
| Systolic Blood Pressure | rs17367504 |
| Systolic Blood Pressure | rs1458038  |

|                         |            |
|-------------------------|------------|
| Systolic Blood Pressure | rs1813353  |
| Systolic Blood Pressure | rs4590817  |
| Systolic Blood Pressure | rs17249754 |
| Systolic Blood Pressure | rs1378942  |
| Systolic Blood Pressure | rs11014166 |
| Systolic Blood Pressure | rs2681492  |
| Systolic Blood Pressure | rs381815   |
| Systolic Blood Pressure | rs3184504  |
| Systolic Blood Pressure | rs1004467  |
| Systolic Blood Pressure | rs448378   |
| Systolic Blood Pressure | rs12046278 |
| Systolic Blood Pressure | rs11191548 |
| Systolic Blood Pressure | rs12946454 |
